# Supplementary material for: Novel tetrahydropyrimidinyl-substituted benzimidazoles and benzothiazoles: synthesis, antibacterial activity, DNA interactions and ADME profiling
Source: Royal Society of Chemistry journal article supplement (doi:10.1039/d2md00143h), 2022-01-01
Supplement: d2md00143h1.pdf [file d2md00143h1.pdf]

## Supplementary Material

### Novel tetrahydropyrimidinyl-substituted benzimidazoles and benzothiazoles:

#### Synthesis, antibacterial activity, DNA interactions and ADME profiling

Valentina Rep,<sup>a</sup> Rebeka Štulić,<sup>a</sup> Sanja Koštrun,<sup>b</sup> Bojan Kuridža,<sup>c</sup> Ivo Crnolatac,<sup>c</sup> Marijana Radić Stojković,<sup>\*c</sup> Hana Čipčić Paljetak,<sup>d</sup> Mihaela Perić,<sup>d</sup> Mario Matijašić<sup>d</sup> and Silvana Raić-Malić<sup>\*a</sup>

<sup>a</sup>Department of Organic Chemistry, Faculty of Chemical Engineering and Technology, University of Zagreb, Marulićev trg 19, 10 000 Zagreb, Croatia.

<sup>b</sup>Selvita d.o.o., Prilaz baruna Filipovića 29, 10 000 Zagreb, Croatia.

<sup>c</sup>Ruđer Bošković Institute, Division of Organic Chemistry and Biochemistry, Bijenička cesta 54, 10 000 Zagreb, Croatia.

<sup>d</sup>Department for Intercellular Communication, Center for Translational and Clinical Research, University of Zagreb School of Medicine, Šalata 2, 10 000 Zagreb, Croatia

| Content                                                                                                                                                          | Pages   |
|------------------------------------------------------------------------------------------------------------------------------------------------------------------|---------|
| 1. Cytotoxic activity assessment of selected compounds <b>12a</b> , <b>12c</b> , <b>15a-c</b> , <b>16a</b> , <b>16c</b> , <b>17a</b> , <b>18a</b> and <b>21b</b> | S1      |
| 2. Spectroscopic characterization of <b>15a-c</b> , <b>16a</b> , <b>16c</b> , <b>17a</b> , <b>21a</b> and <b>21b</b>                                             | S2–S5   |
| 3. Interactions of <b>15a-c</b> , <b>16a</b> , <b>16c</b> , <b>17a</b> , <b>21a</b> and <b>21b</b> with ds-polynucleotides in neutral medium (pH=7.0)            |         |
| 3.1. Fluorimetric titrations                                                                                                                                     | S5–S15  |
| 3.2. Thermal melting experiments                                                                                                                                 | S16–S17 |
| 3.3. Circular dichroism (CD) titration                                                                                                                           | S18–S21 |
| 4. <sup>1</sup> H and <sup>13</sup> C NMR spectra of novel compounds                                                                                             | S22–S52 |

## 1. Cytotoxic activity

Table S1. Cytotoxic activity of selected compounds against HepG2 cell lines

| Compd      | X  | R <sub>1</sub>   | R <sub>2</sub>                                                                      | IC <sub>50</sub> (μM) |
|------------|----|------------------|-------------------------------------------------------------------------------------|-----------------------|
|            |    |                  |                                                                                     | HepG2                 |
| <b>12a</b> | NH | H                |    | >100                  |
| <b>12c</b> | NH | OCH <sub>3</sub> |    | >100                  |
| <b>15a</b> | NH | H                |                                                                                     | >100                  |
| <b>15b</b> | NH | F                |    | >100                  |
| <b>15c</b> | NH | OCH <sub>3</sub> |                                                                                     | >100                  |
| <b>16a</b> | NH | H                |    | >100                  |
| <b>16c</b> | NH | OCH <sub>3</sub> |    | >100                  |
| <b>17a</b> | NH | H                |  | >100                  |
| <b>18a</b> | NH | H                |  | >100                  |
| <b>21b</b> | S  | F                |  | >100                  |

<sup>a</sup>50% inhibitory concentration or compound concentration required to inhibit tumour cell proliferation by 50%.

## 2. Spectroscopic characterization of 15a-c, 16a, 16c, 17a, 21a and 21b

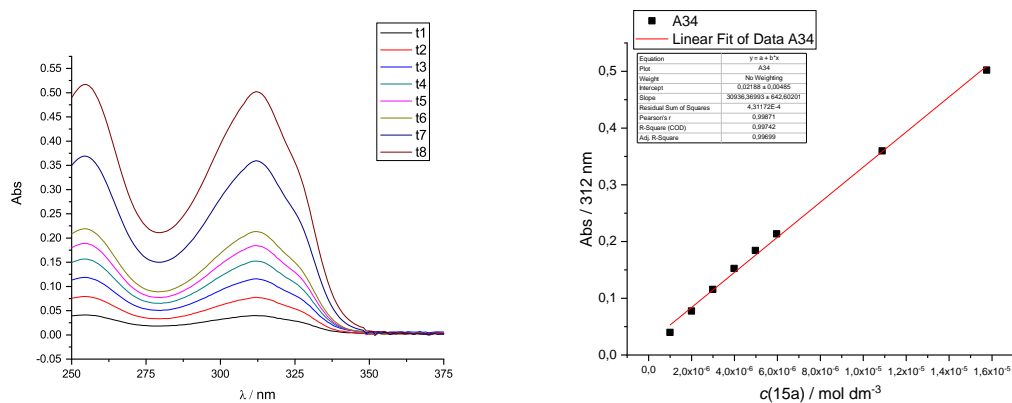

Figure S1. UV/Vis spectra changes of **15a** at different concentrations (concentration range from  $1 \times 10^{-6}$  –  $1.6 \times 10^{-5}$  mol dm<sup>-3</sup>) at pH=7, sodium cacodylate buffer,  $I=0.05$  M.

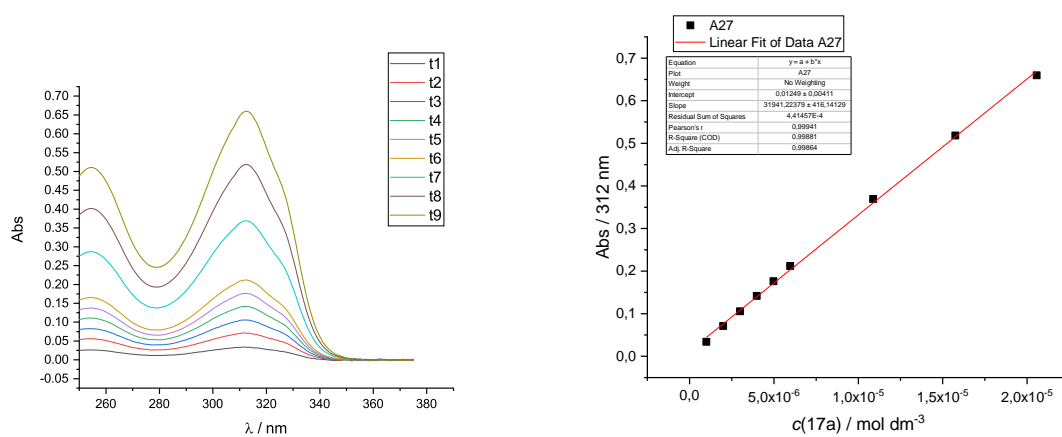

Figure S2. UV/Vis spectra changes of **17a** at different concentrations (concentration range from  $1 \times 10^{-6}$  –  $2 \times 10^{-5}$  mol dm<sup>-3</sup>) at pH=7, sodium cacodylate buffer,  $I=0.05$  M.

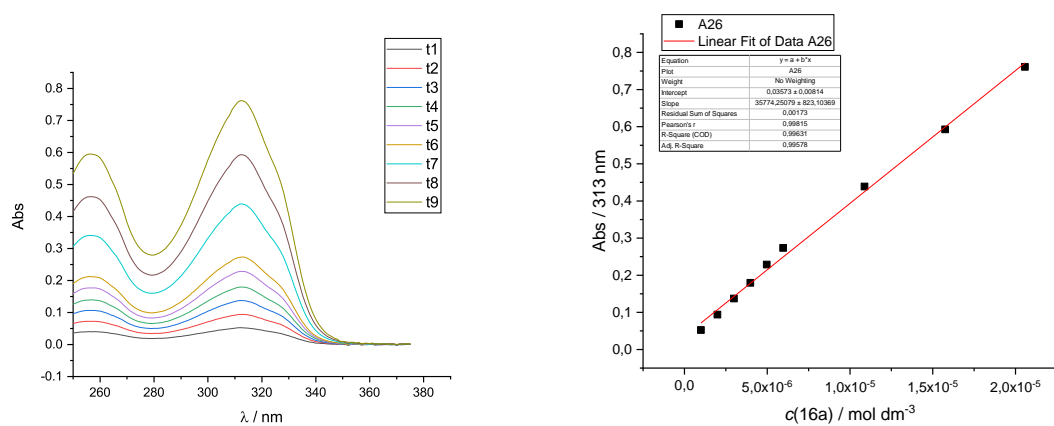

Figure S3. UV/Vis spectra changes of **16a** at different concentrations (concentration range from  $1 \times 10^{-6} - 2 \times 10^{-5} \text{ mol dm}^{-3}$ ) at pH=7, sodium cacodylate buffer,  $I=0.05 \text{ M}$ .

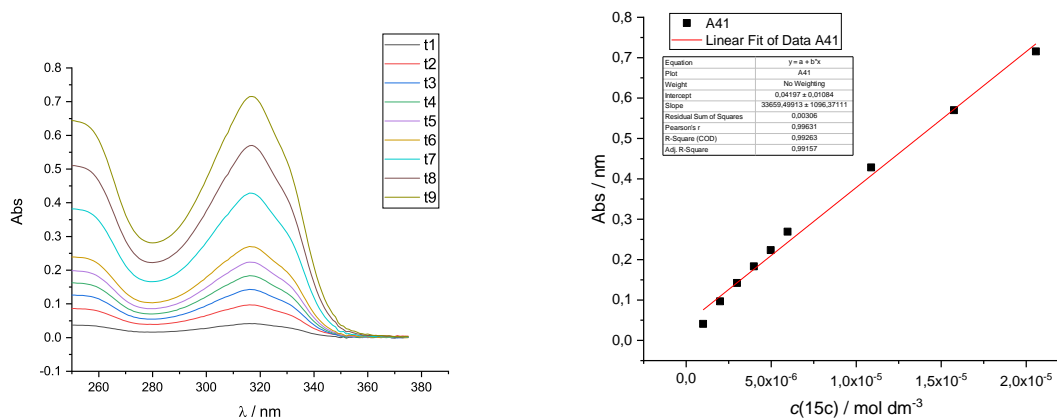

Figure S4. UV/Vis spectra changes of **15c** at different concentrations (concentration range from  $1 \times 10^{-6} - 2 \times 10^{-5} \text{ mol dm}^{-3}$ ) at pH=7, sodium cacodylate buffer,  $I=0.05 \text{ M}$ .

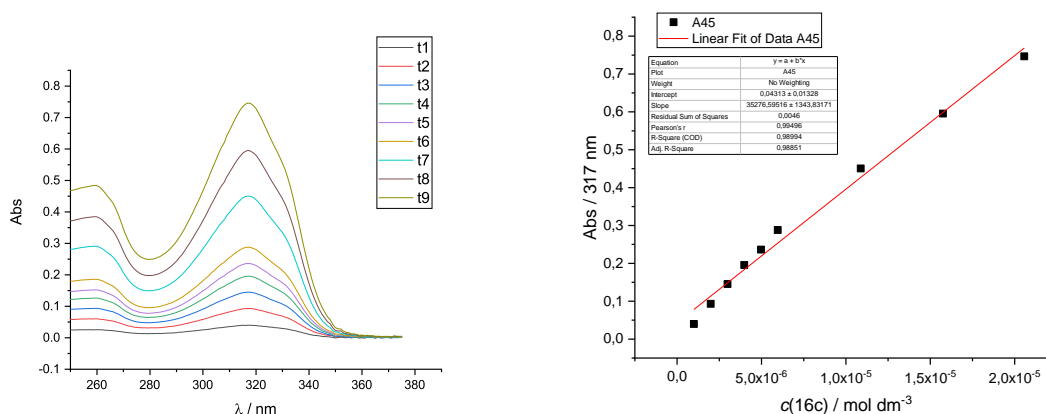

Figure S5. UV/Vis spectra changes of **16c** at different concentrations (concentration range from  $1 \times 10^{-6} - 2 \times 10^{-5} \text{ mol dm}^{-3}$ ) at pH=7, sodium cacodylate buffer,  $I=0.05 \text{ M}$ .

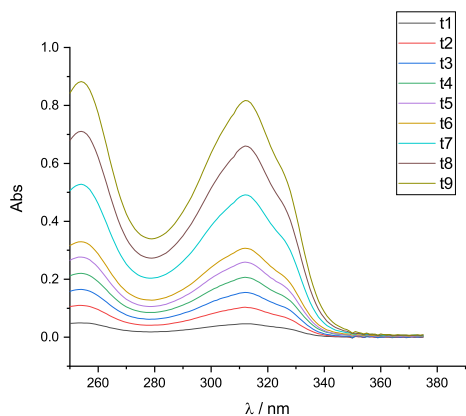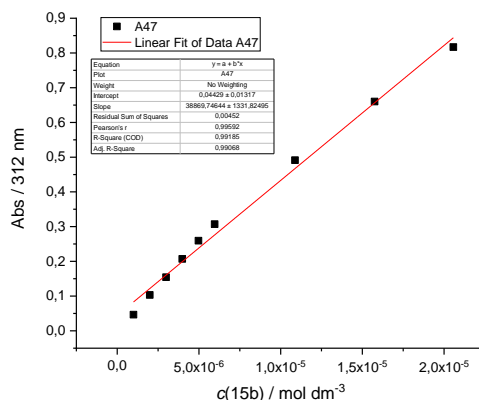

Figure S6. UV/Vis spectra changes of **15b** at different concentrations (concentration range from  $1 \times 10^{-6} - 2 \times 10^{-5} \text{ mol dm}^{-3}$ ) at pH=7, sodium cacodylate buffer,  $I=0.05 \text{ M}$ .

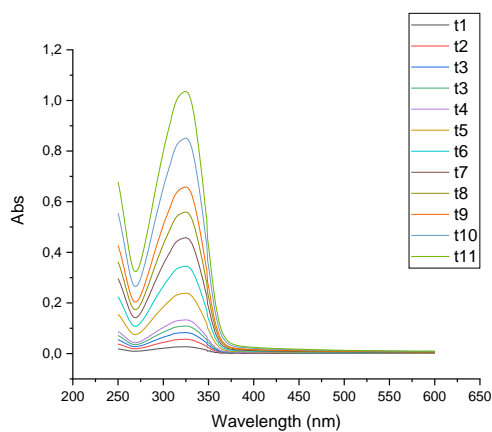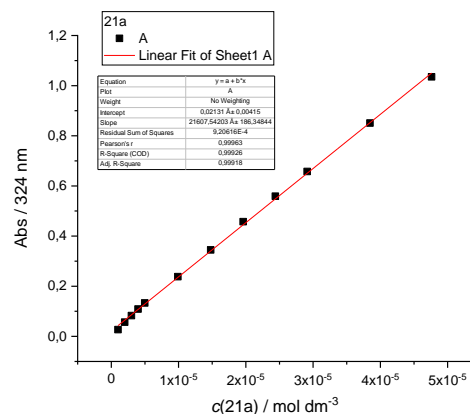

Figure S7. UV/Vis spectra changes of **21a** at different concentrations (concentration range from  $1 \times 10^{-6} - 2 \times 10^{-5} \text{ mol dm}^{-3}$ ) at pH=7, sodium cacodylate buffer,  $I=0.05 \text{ M}$ .

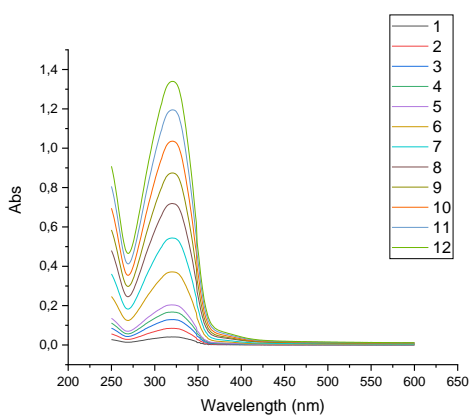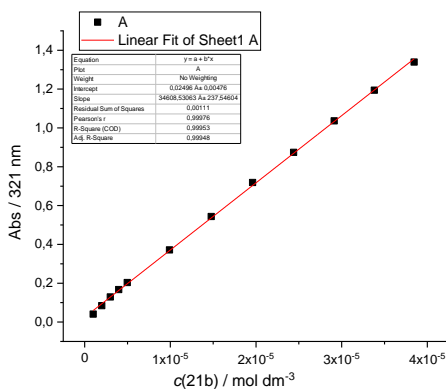

Figure S8. UV/Vis spectra changes of **21b** at different concentrations (concentration range from  $1 \times 10^{-6} - 2 \times 10^{-5} \text{ mol dm}^{-3}$ ) at pH=7, sodium cacodylate buffer,  $l=0.05 \text{ M}$ .

**Table S2.** Electronic absorption data **15a-c**, **16a**, **16c**, **17a**, **21a** and **21b**

|            | pH = 7,0 <sup>a</sup>              |                                                       |
|------------|------------------------------------|-------------------------------------------------------|
|            | $\lambda_{\text{max}} / \text{nm}$ | $\epsilon \times 10^3 / \text{mmol}^{-1} \text{cm}^2$ |
| <b>15a</b> | 312                                | 30.94                                                 |
| <b>15b</b> | 312                                | 38.87                                                 |
| <b>15c</b> | 317                                | 33.66                                                 |
| <b>16a</b> | 313                                | 35.77                                                 |
| <b>16c</b> | 317                                | 35.27                                                 |
| <b>17a</b> | 312                                | 31.94                                                 |
| <b>21a</b> | 324                                | 21.61                                                 |
| <b>21b</b> | 321                                | 34.61                                                 |

<sup>a</sup> Sodium cacodylate buffer,  $l = 0.05 \text{ mol dm}^{-3}$ , pH = 7.0.

### 3. Interactions of 15a-c, 16a, 16c, 17a, 21a and 21b with ds-polynucleotides in neutral medium (pH=7.0)

#### 3.1. Fluorimetric titrations

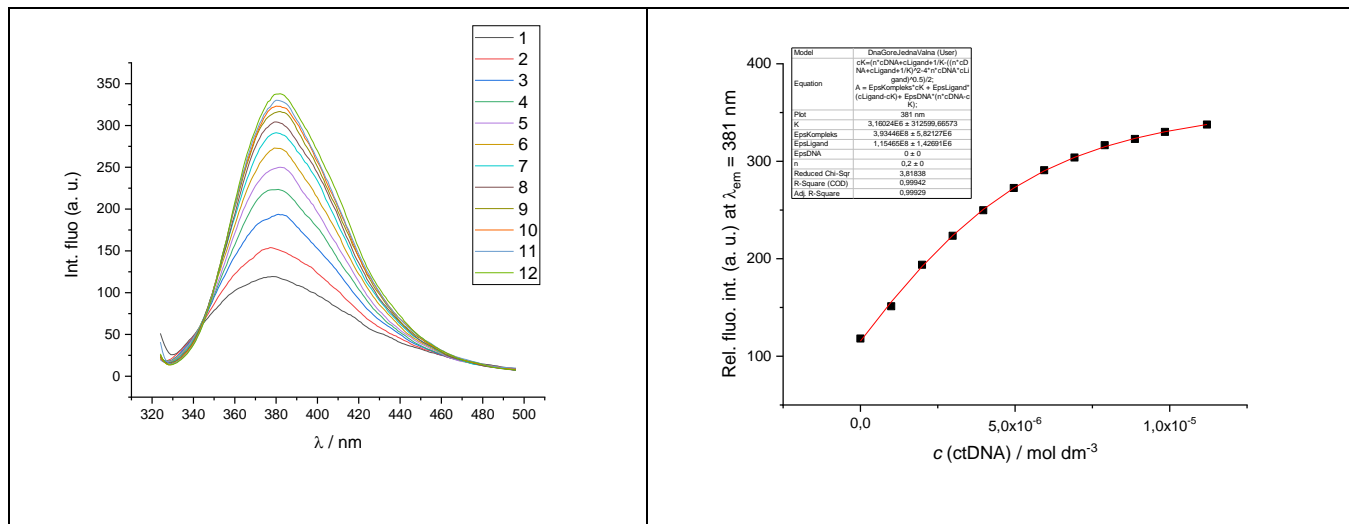

Figure S9. a) Changes in fluorescence spectrum of **15a** ( $c = 1 \times 10^{-6} \text{ mol dm}^{-3}$ ,  $\lambda_{\text{exc}}=312 \text{ nm}$ ) upon titration with ctDNA ( $c = 1.0 \times 10^{-6} - 1.1 \times 10^{-5} \text{ mol dm}^{-3}$ ); b) Dependence of **15a** absorbance at  $\lambda = 381 \text{ nm}$  on  $c(\text{ctDNA})$ , at pH=7, sodium cacodylate buffer,  $l = 0.05 \text{ mol dm}^{-3}$ .

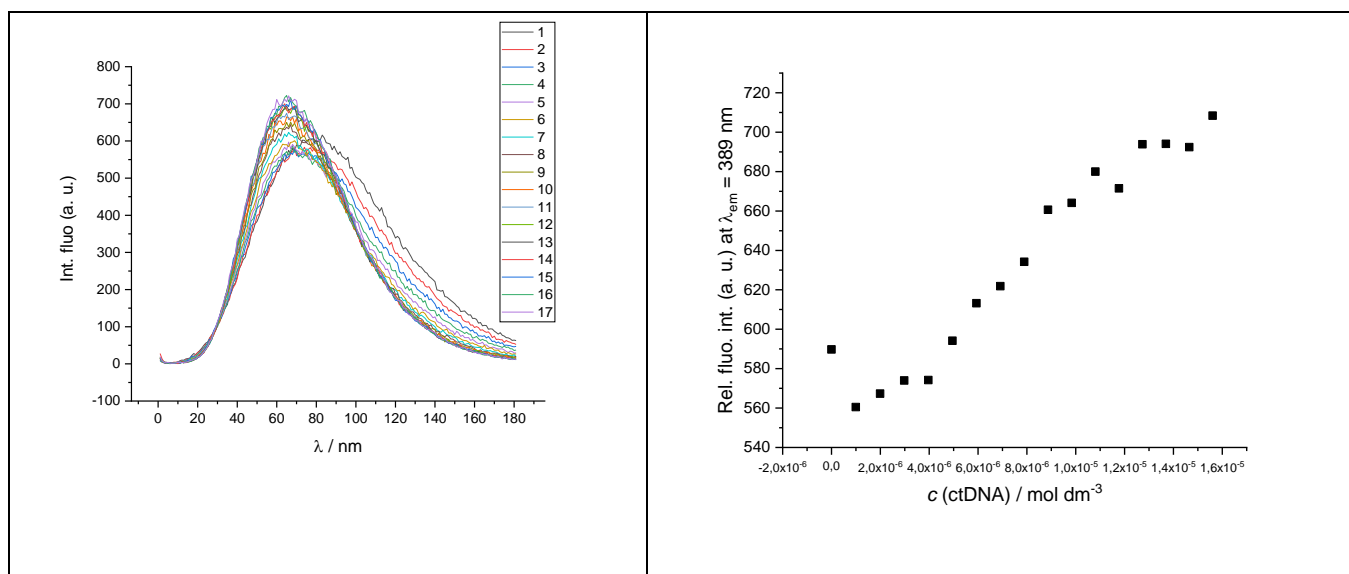

Figure S10. a) Changes in fluorescence spectrum of **17a** ( $c = 1 \times 10^{-6} \text{ mol dm}^{-3}$ ,  $\lambda_{\text{exc}}=312 \text{ nm}$ ) upon titration with ctDNA ( $c = 1.0 \times 10^{-6} - 1.6 \times 10^{-5} \text{ mol dm}^{-3}$ ); b) Dependence of **17a** absorbance at  $\lambda = 389 \text{ nm}$  on  $c(\text{ctDNA})$ , at pH=7, sodium cacodylate buffer,  $l = 0.05 \text{ mol dm}^{-3}$ .

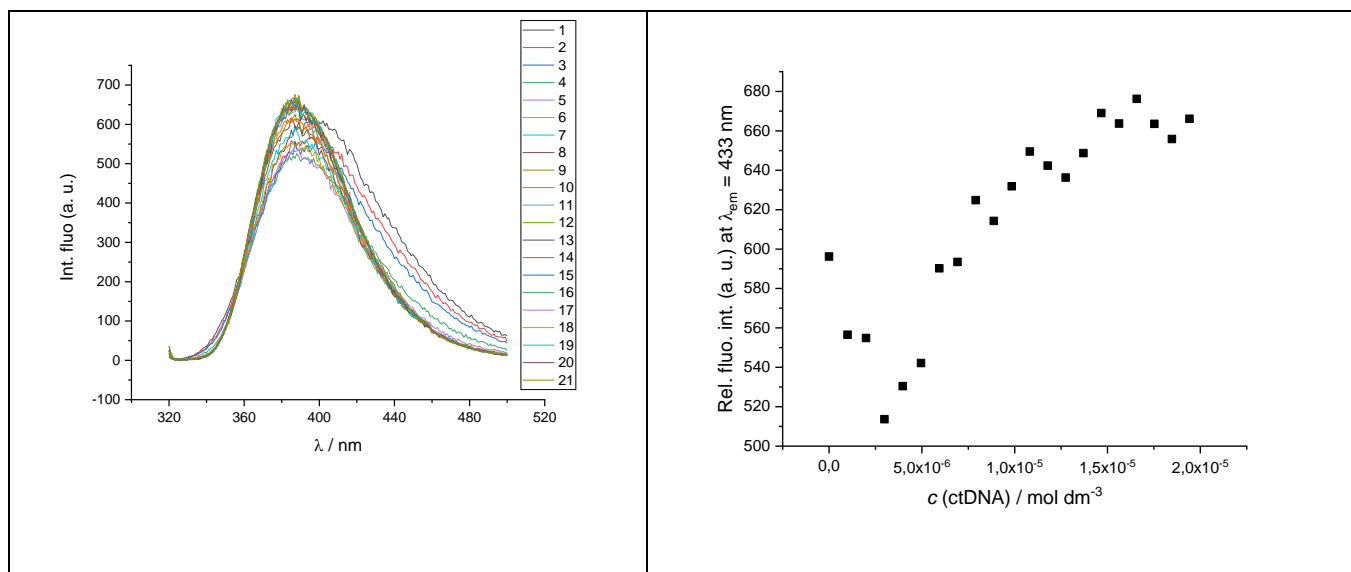

Figure S11. a) Changes in fluorescence spectrum of **16a** ( $c = 1 \times 10^{-6} \text{ mol dm}^{-3}$ ,  $\lambda_{\text{exc}} = 313 \text{ nm}$ ) upon titration with ctDNA ( $c = 1.0 \times 10^{-6} - 1.9 \times 10^{-5} \text{ mol dm}^{-3}$ ); b) Dependence of **16a** absorbance at  $\lambda = 433 \text{ nm}$  on  $c(\text{ctDNA})$ , at  $\text{pH} = 7$ , sodium cacodylate buffer,  $I = 0.05 \text{ mol dm}^{-3}$ .

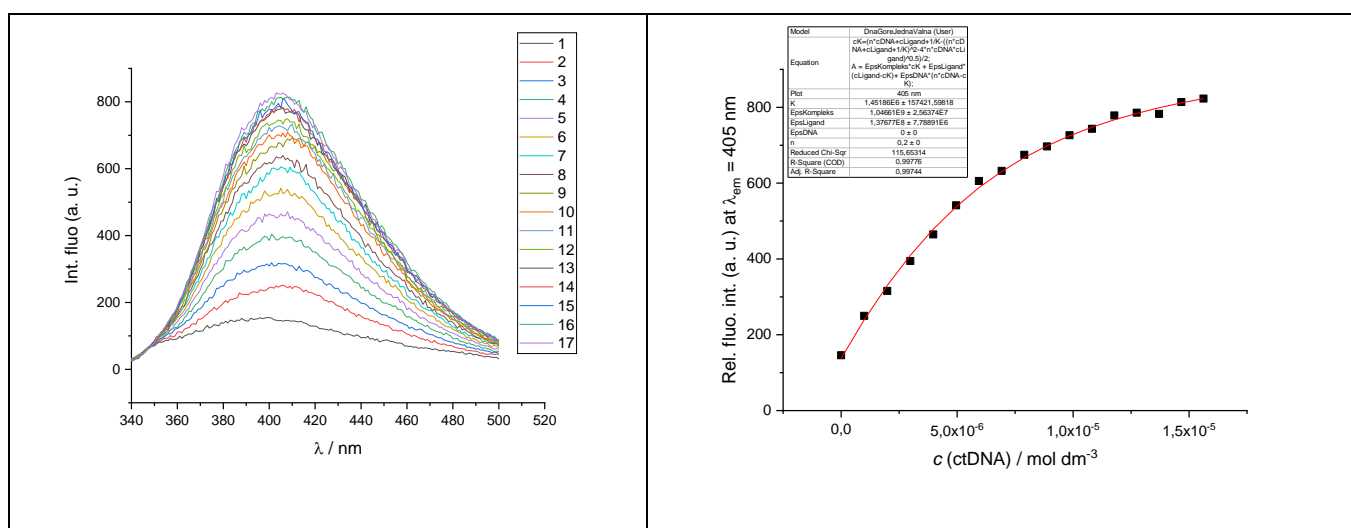

Figure S12. a) Changes in fluorescence spectrum of **15c** ( $c = 1 \times 10^{-6} \text{ mol dm}^{-3}$ ,  $\lambda_{\text{exc}} = 317 \text{ nm}$ ) upon titration with ctDNA ( $c = 1.0 \times 10^{-6} - 1.6 \times 10^{-5} \text{ mol dm}^{-3}$ ); b) Dependence of **15c** absorbance at  $\lambda = 405 \text{ nm}$  on  $c(\text{ctDNA})$ , at  $\text{pH} = 7$ , sodium cacodylate buffer,  $I = 0.05 \text{ mol dm}^{-3}$ .



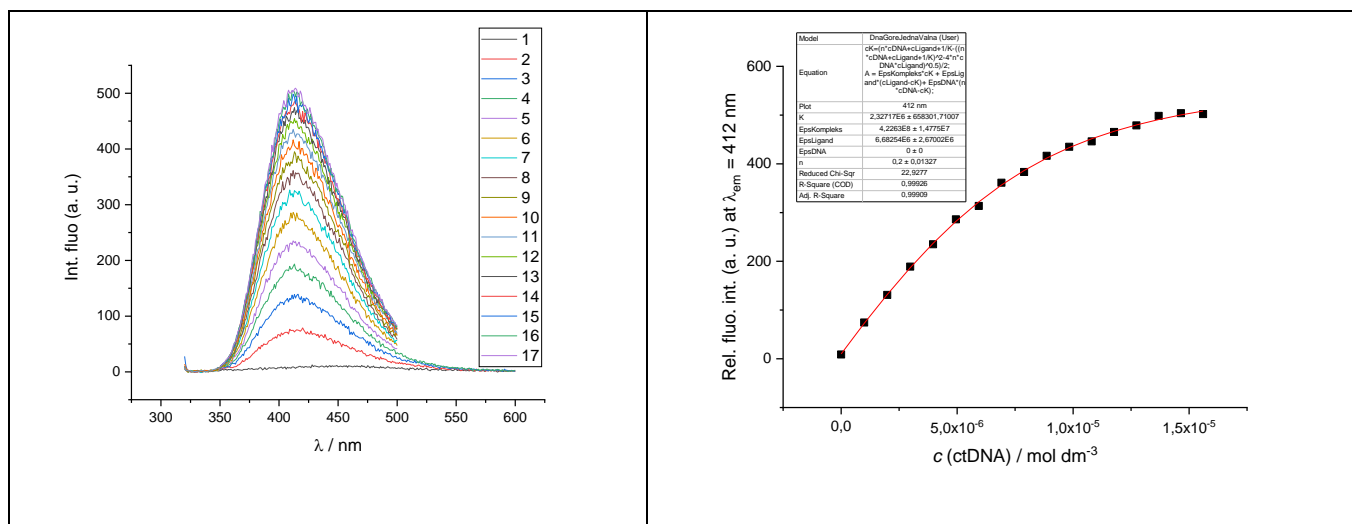

Figure S13. a) Changes in fluorescence spectrum of **16c** ( $c = 1 \times 10^{-6} \text{ mol dm}^{-3}$ ,  $\lambda_{exc} = 317 \text{ nm}$ ) upon titration with ctDNA ( $c = 1.0 \times 10^{-6} - 1.6 \times 10^{-5} \text{ mol dm}^{-3}$ ); b) Dependence of **16c** absorbance at  $\lambda = 412 \text{ nm}$  on  $c(\text{ctDNA})$ , at pH=7, sodium cacodylate buffer,  $I = 0.05 \text{ mol dm}^{-3}$ .

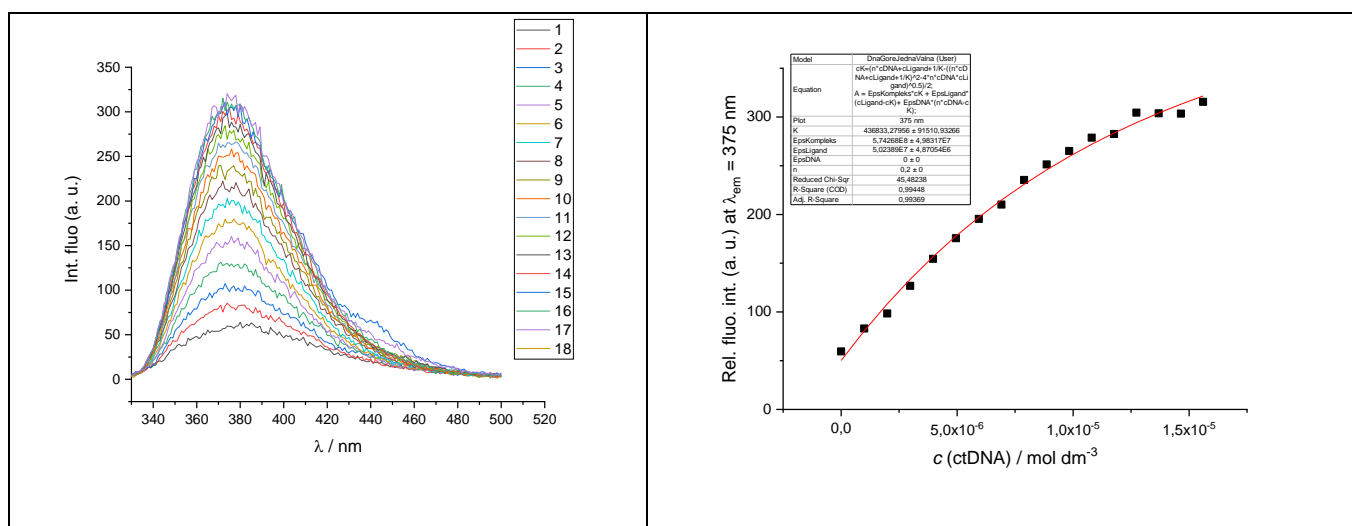

Figure S14. a) Changes in fluorescence spectrum of **15b** ( $c = 1 \times 10^{-6} \text{ mol dm}^{-3}$ ,  $\lambda_{exc} = 312 \text{ nm}$ ) upon titration with ctDNA ( $c = 1.0 \times 10^{-6} - 1.6 \times 10^{-5} \text{ mol dm}^{-3}$ ); b) Dependence of **15b** absorbance at  $\lambda = 375 \text{ nm}$  on  $c(\text{ctDNA})$ , at pH=7, sodium cacodylate buffer,  $I = 0.05 \text{ mol dm}^{-3}$ .

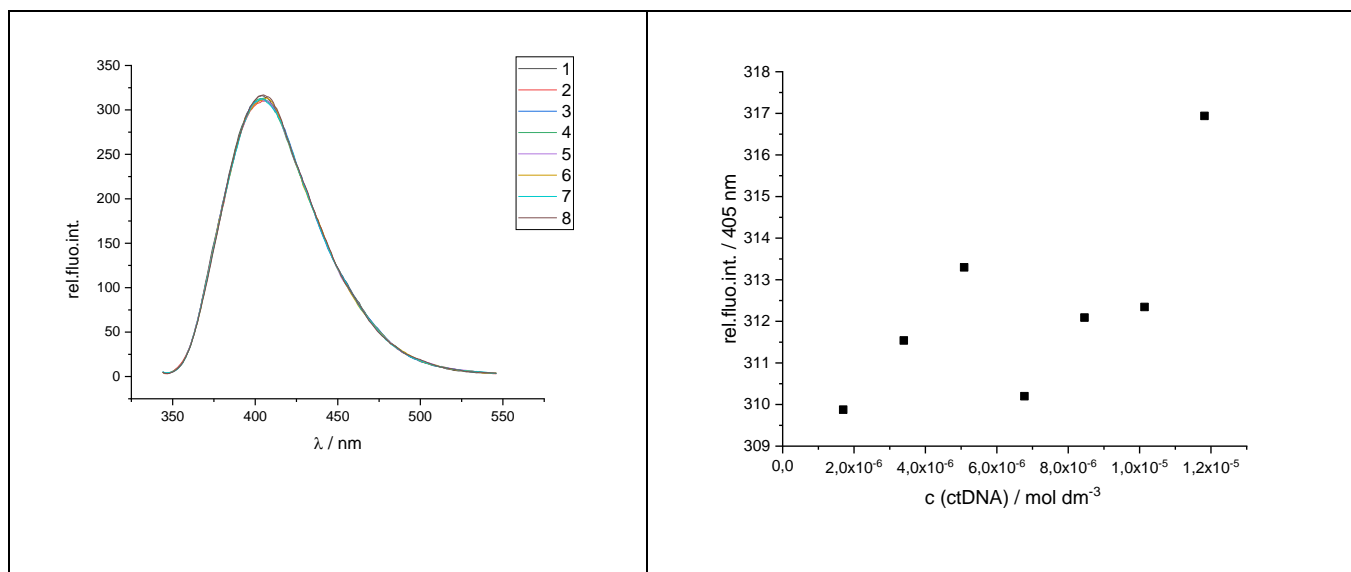

Figure S15. a) Changes in fluorescence spectrum of **21a** ( $c = 2 \times 10^{-6} \text{ mol dm}^{-3}$ ,  $\lambda_{\text{exc}} = 324 \text{ nm}$ ) upon titration with ctDNA ( $c = 1.7 \times 10^{-6} - 1.2 \times 10^{-5} \text{ mol dm}^{-3}$ ); b) Dependence of **21a** absorbance at  $\lambda = 405 \text{ nm}$  on  $c(\text{ctDNA})$ , at  $\text{pH} = 7$ , sodium cacodylate buffer,  $l = 0.05 \text{ mol dm}^{-3}$ .

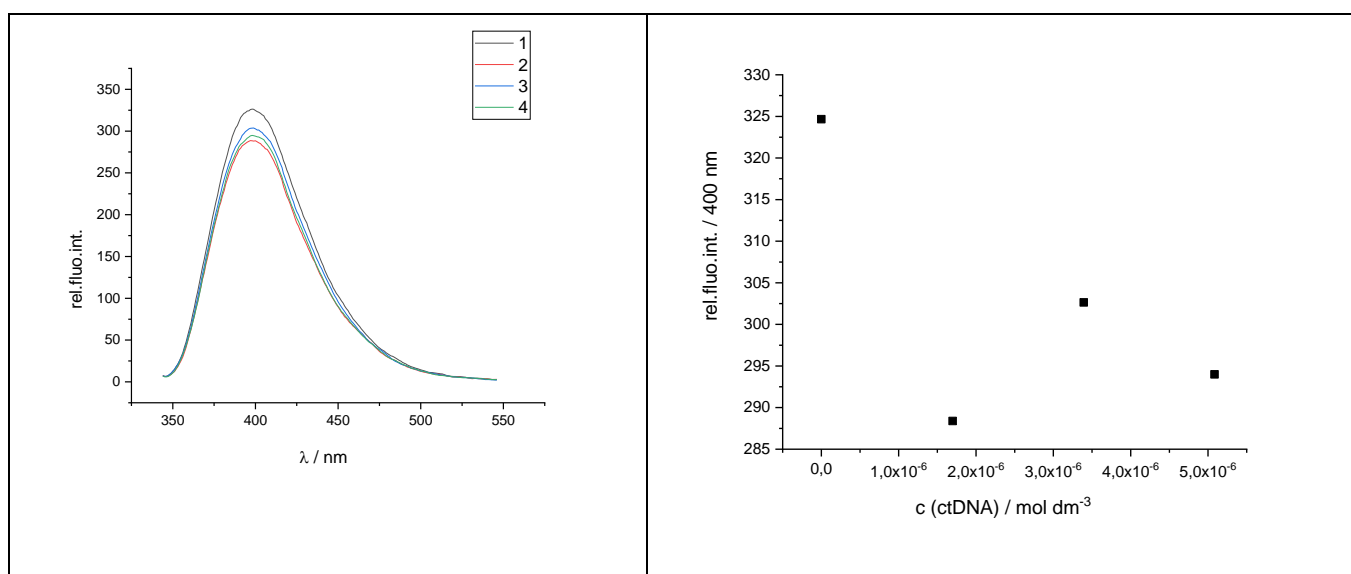

Figure S16. a) Changes in fluorescence spectrum of **21b** ( $c = 2 \times 10^{-6} \text{ mol dm}^{-3}$ ,  $\lambda_{\text{exc}} = 321 \text{ nm}$ ) upon titration with ctDNA ( $c = 1.7 \times 10^{-6} - 1.2 \times 10^{-5} \text{ mol dm}^{-3}$ ); b) Dependence of **21b** absorbance at  $\lambda = 400 \text{ nm}$  on  $c(\text{ctDNA})$ , at  $\text{pH} = 7$ , sodium cacodylate buffer,  $l = 0.05 \text{ mol dm}^{-3}$ .

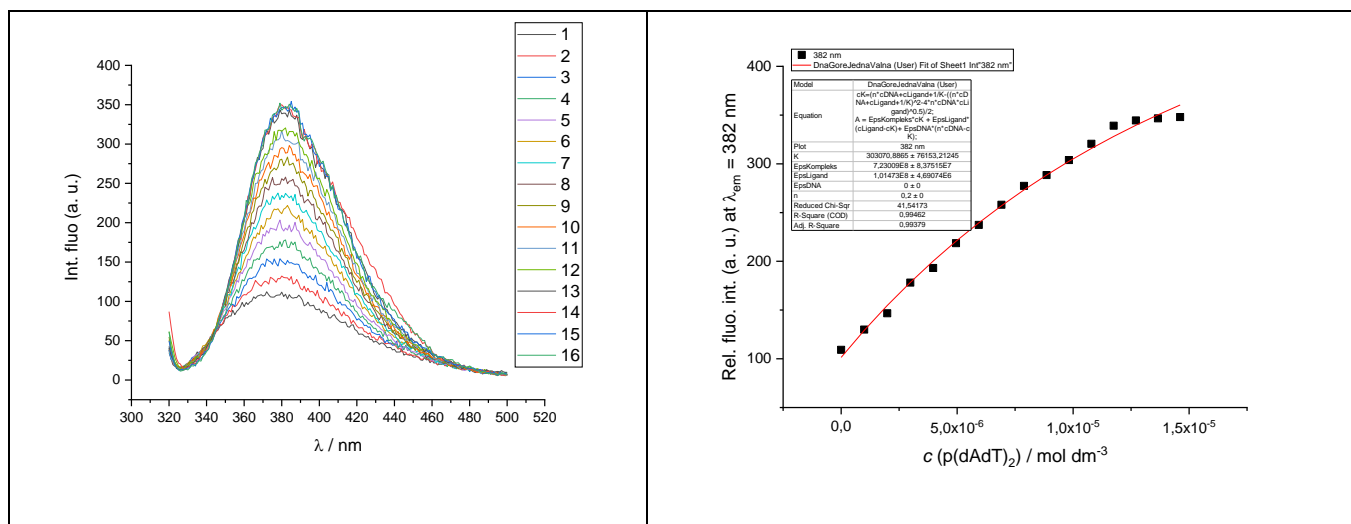

Figure S17. a) Changes in fluorescence spectrum of **15a** ( $c = 1 \times 10^{-6} \text{ mol dm}^{-3}$ ,  $\lambda_{\text{exc}} = 312 \text{ nm}$ ) upon titration with  $\text{p(dAdT)}_2$  ( $c = 1.0 \times 10^{-6} - 1.5 \times 10^{-5} \text{ mol dm}^{-3}$ ); b) Dependence of **15a** absorbance at  $\lambda = 382 \text{ nm}$  on  $c(\text{p(dAdT)}_2)$ , at pH=7, sodium cacodylate buffer,  $l = 0.05 \text{ mol dm}^{-3}$ .

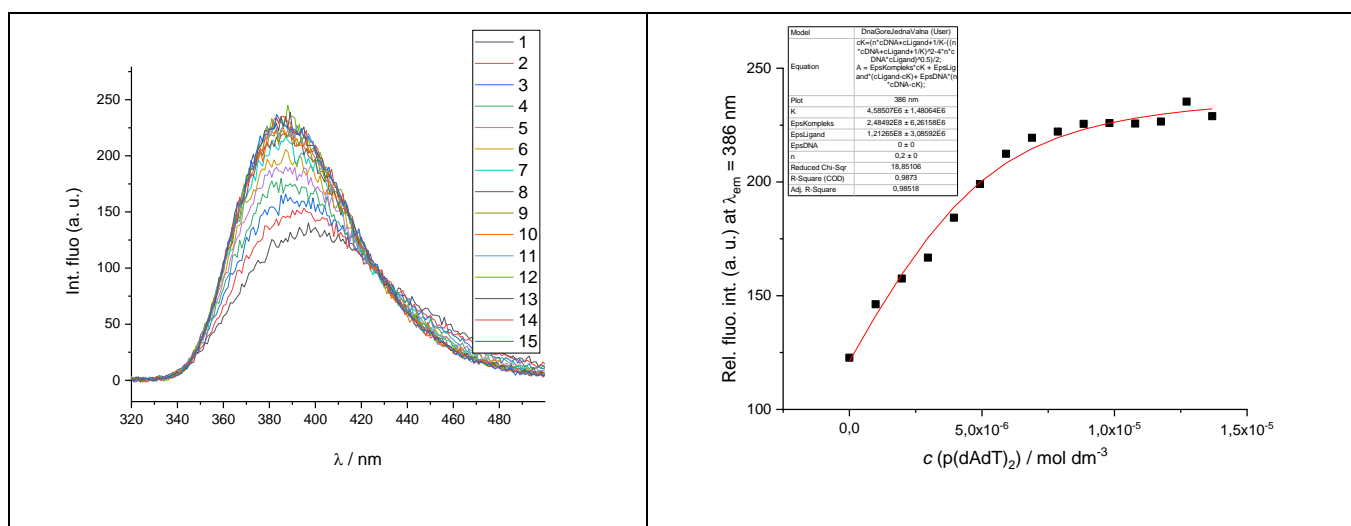

Figure S18. a) Changes in fluorescence spectrum of **17a** ( $c = 1 \times 10^{-6} \text{ mol dm}^{-3}$ ,  $\lambda_{\text{exc}} = 312 \text{ nm}$ ) upon titration with  $\text{p(dAdT)}_2$  ( $c = 1.0 \times 10^{-6} - 1.4 \times 10^{-5} \text{ mol dm}^{-3}$ ); b) Dependence of **17a** absorbance at  $\lambda = 386 \text{ nm}$  on  $c(\text{p(dAdT)}_2)$ , at pH=7, sodium cacodylate buffer,  $l = 0.05 \text{ mol dm}^{-3}$ .

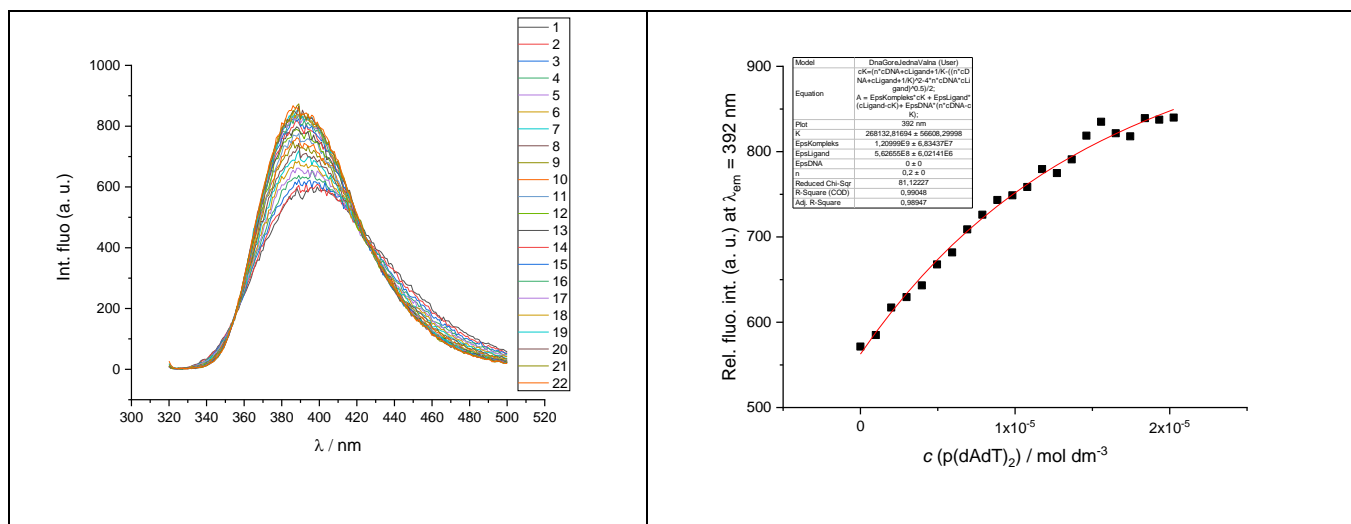

Figure S19. a) Changes in fluorescence spectrum of **16a** ( $c = 1 \times 10^{-6} \text{ mol dm}^{-3}$ ,  $\lambda_{exc} = 313 \text{ nm}$ ) upon titration with  $p(dAdT)_2$  ( $c = 1.0 \times 10^{-6} - 2.0 \times 10^{-5} \text{ mol dm}^{-3}$ ); b) Dependence of **16a** absorbance at  $\lambda = 392 \text{ nm}$  on  $c(p(dAdT)_2)$ , at pH=7, sodium cacodylate buffer,  $l = 0.05 \text{ mol dm}^{-3}$ .

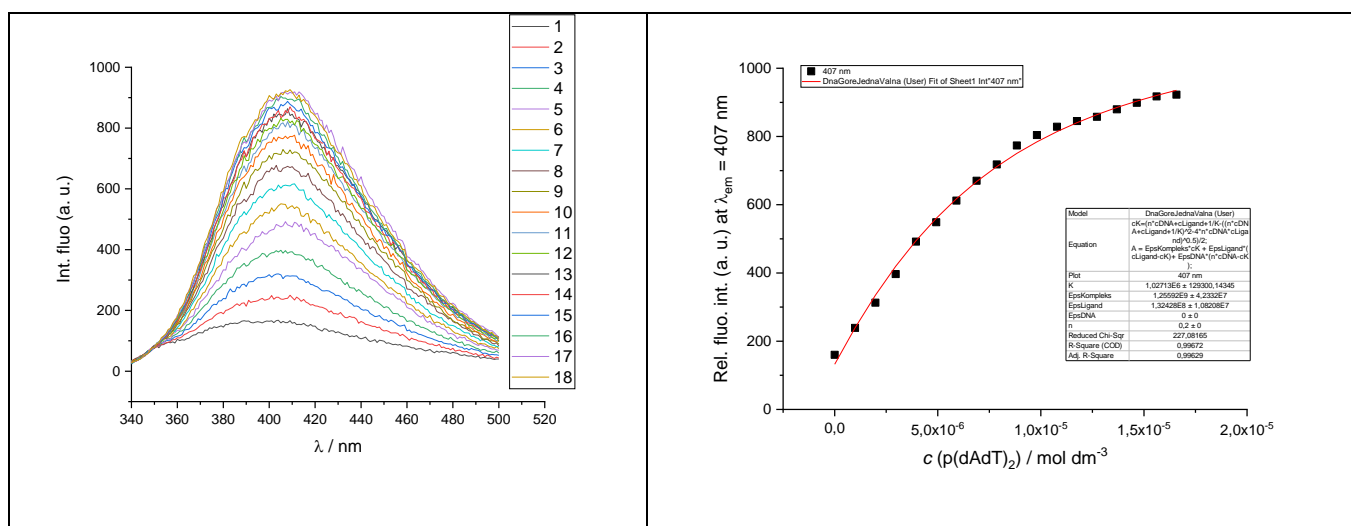

Figure S20. a) Changes in fluorescence spectrum of **15c** ( $c = 1 \times 10^{-6} \text{ mol dm}^{-3}$ ,  $\lambda_{exc} = 317 \text{ nm}$ ) upon titration with  $p(dAdT)_2$  ( $c = 1.0 \times 10^{-6} - 1.7 \times 10^{-5} \text{ mol dm}^{-3}$ ); b) Dependence of **15c** absorbance at  $\lambda = 407 \text{ nm}$  on  $c(p(dAdT)_2)$ , at pH=7, sodium cacodylate buffer,  $l = 0.05 \text{ mol dm}^{-3}$ .

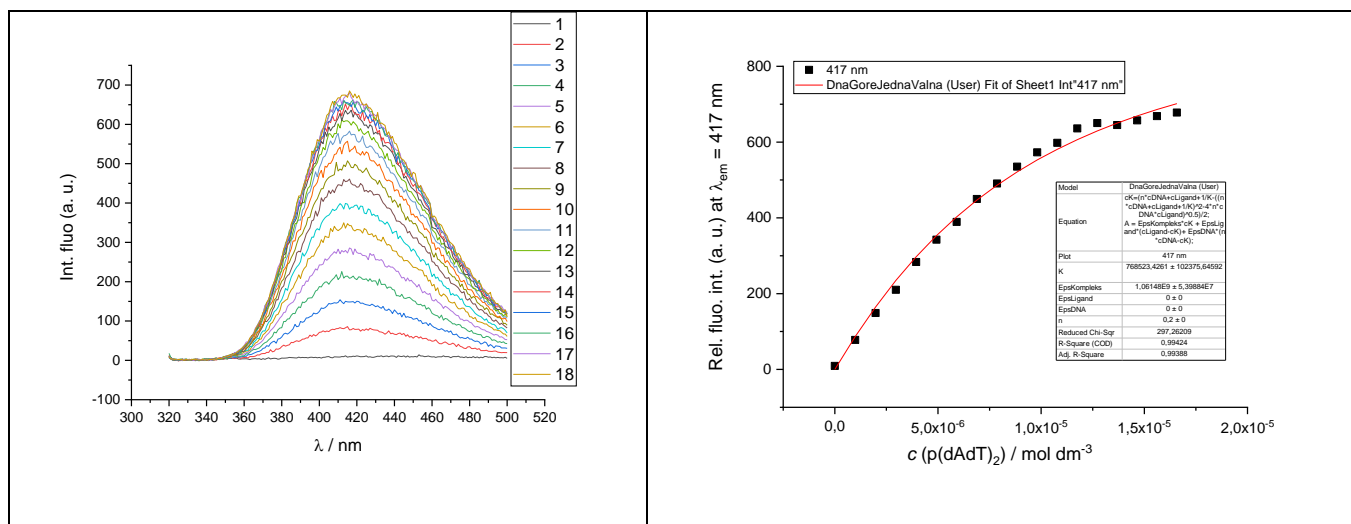

Figure S21. a) Changes in fluorescence spectrum of **16c** ( $c = 1 \times 10^{-6} \text{ mol dm}^{-3}$ ,  $\lambda_{\text{exc}} = 317 \text{ nm}$ ) upon titration with  $p(\text{dAdT})_2$  ( $c = 1.0 \times 10^{-6} - 1.7 \times 10^{-5} \text{ mol dm}^{-3}$ ); b) Dependence of **16c** absorbance at  $\lambda = 417 \text{ nm}$  on  $c(p(\text{dAdT})_2)$ , at pH=7, sodium cacodylate buffer,  $l = 0.05 \text{ mol dm}^{-3}$ .

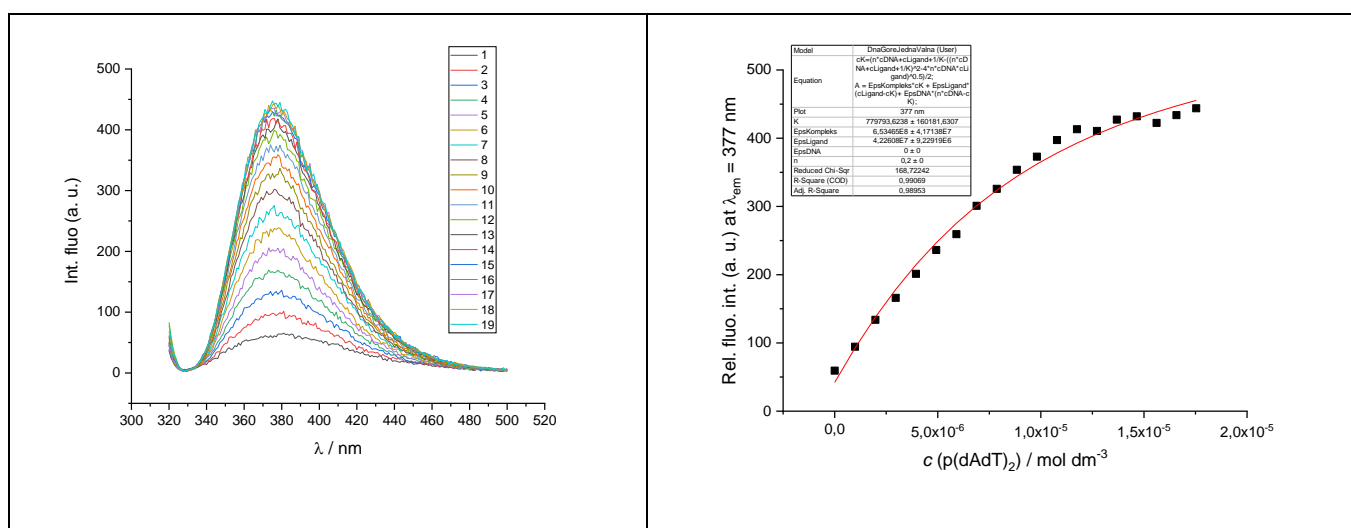

Figure S22. a) Changes in fluorescence spectrum of **15b** ( $c = 1 \times 10^{-6} \text{ mol dm}^{-3}$ ,  $\lambda_{\text{exc}} = 312 \text{ nm}$ ) upon titration with  $p(\text{dAdT})_2$  ( $c = 1.0 \times 10^{-6} - 1.7 \times 10^{-5} \text{ mol dm}^{-3}$ ); b) Dependence of **15b** absorbance at  $\lambda = 377 \text{ nm}$  on  $c(p(\text{dAdT})_2)$ , at pH=7, sodium cacodylate buffer,  $l = 0.05 \text{ mol dm}^{-3}$ .

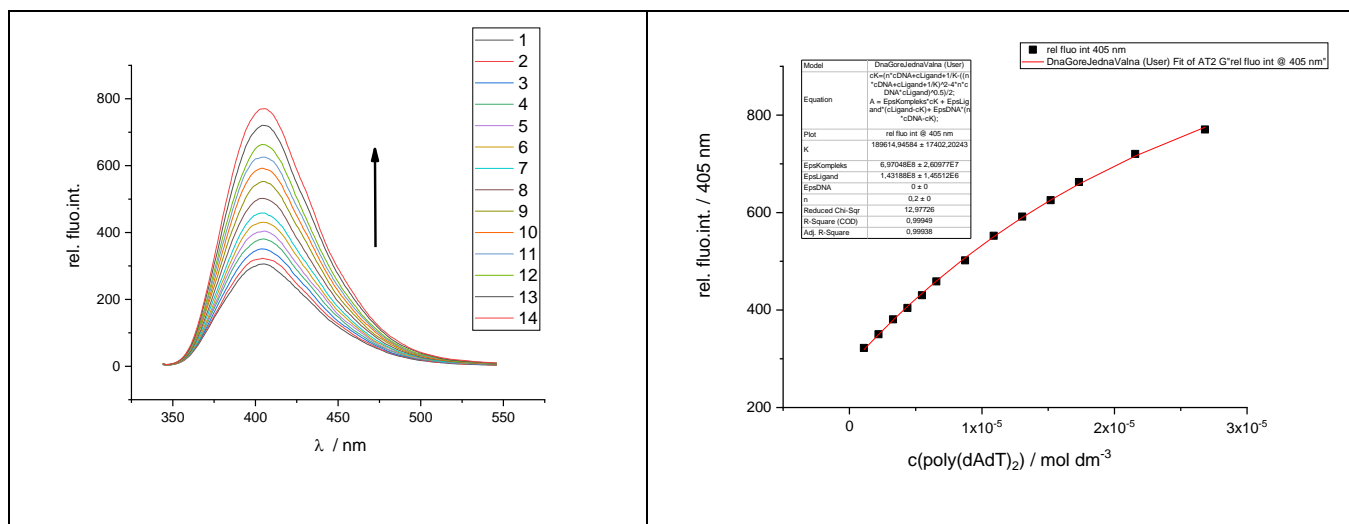

Figure S23. a) Changes in fluorescence spectrum of **21a** ( $c = 2 \times 10^{-6} \text{ mol dm}^{-3}$ ,  $\lambda_{\text{exc}} = 324 \text{ nm}$ ) upon titration with  $p(\text{dAdT})_2$  ( $c = 2.5 \times 10^{-6} - 8.5 \times 10^{-5} \text{ mol dm}^{-3}$ ); b) Dependence of **21a** absorbance at  $\lambda = 405 \text{ nm}$  on  $c(p(\text{dAdT})_2)$ , at  $\text{pH} = 7$ , sodium cacodylate buffer,  $l = 0.05 \text{ mol dm}^{-3}$ .

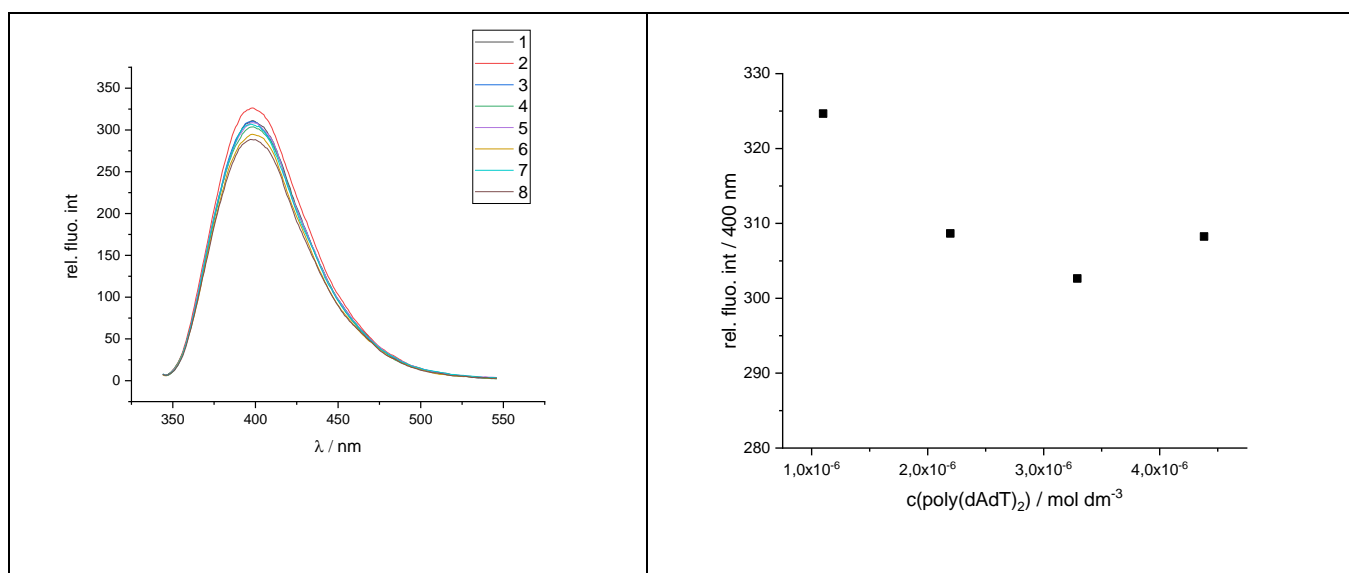

Figure S24. a) Changes in fluorescence spectrum of **21b** ( $c = 2 \times 10^{-6} \text{ mol dm}^{-3}$ ,  $\lambda_{\text{exc}} = 321 \text{ nm}$ ) upon titration with  $p(\text{dAdT})_2$  ( $c = 2.1 \times 10^{-6} - 4.4 \times 10^{-6} \text{ mol dm}^{-3}$ ); b) Dependence of **21b** absorbance at  $\lambda = 400 \text{ nm}$  on  $c(p(\text{dAdT})_2)$ , at  $\text{pH} = 7$ , sodium cacodylate buffer,  $l = 0.05 \text{ mol dm}^{-3}$ .

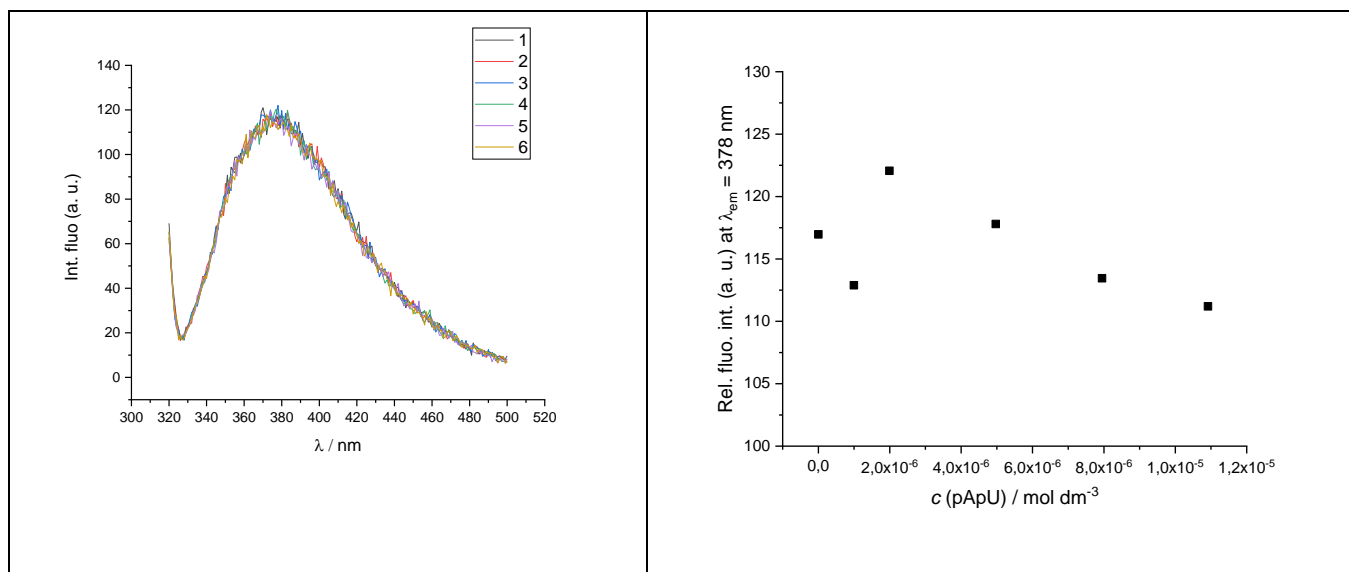

Figure S25. a) Changes in fluorescence spectrum of **15a** ( $c = 1 \times 10^{-6} \text{ mol dm}^{-3}$ ,  $\lambda_{\text{exc}} = 312 \text{ nm}$ ) upon titration with poly A-poly U ( $c = 1.0 \times 10^{-6} - 1.0 \times 10^{-5} \text{ mol dm}^{-3}$ ); b) Dependence of **15a** absorbance at  $\lambda = 378 \text{ nm}$  on  $c(\text{poly A-poly U})$ , at  $\text{pH} = 7$ , sodium cacodylate buffer,  $I = 0.05 \text{ mol dm}^{-3}$ .

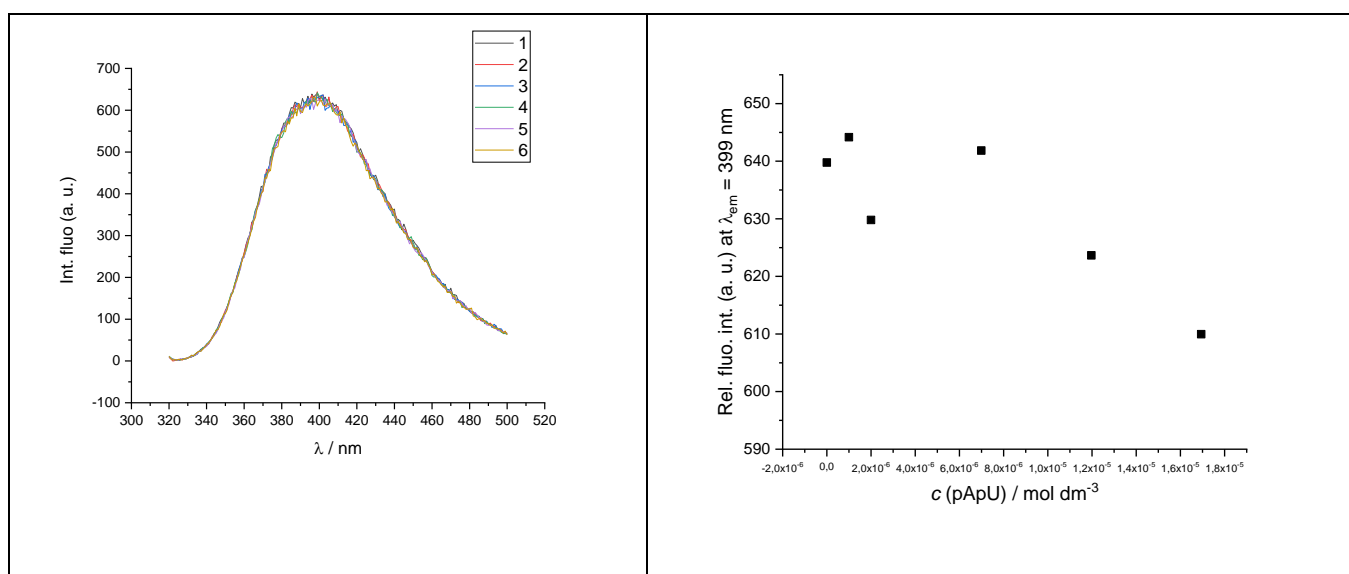

Figure S26. a) Changes in fluorescence spectrum of **17a** ( $c = 1 \times 10^{-6} \text{ mol dm}^{-3}$ ,  $\lambda_{\text{exc}} = 312 \text{ nm}$ ) upon titration with poly A-poly U ( $c = 1.0 \times 10^{-6} - 1.7 \times 10^{-5} \text{ mol dm}^{-3}$ ); b) Dependence of **17a** absorbance at  $\lambda = 399 \text{ nm}$  on  $c(\text{poly A-poly U})$ , at  $\text{pH} = 7$ , sodium cacodylate buffer,  $I = 0.05 \text{ mol dm}^{-3}$ .

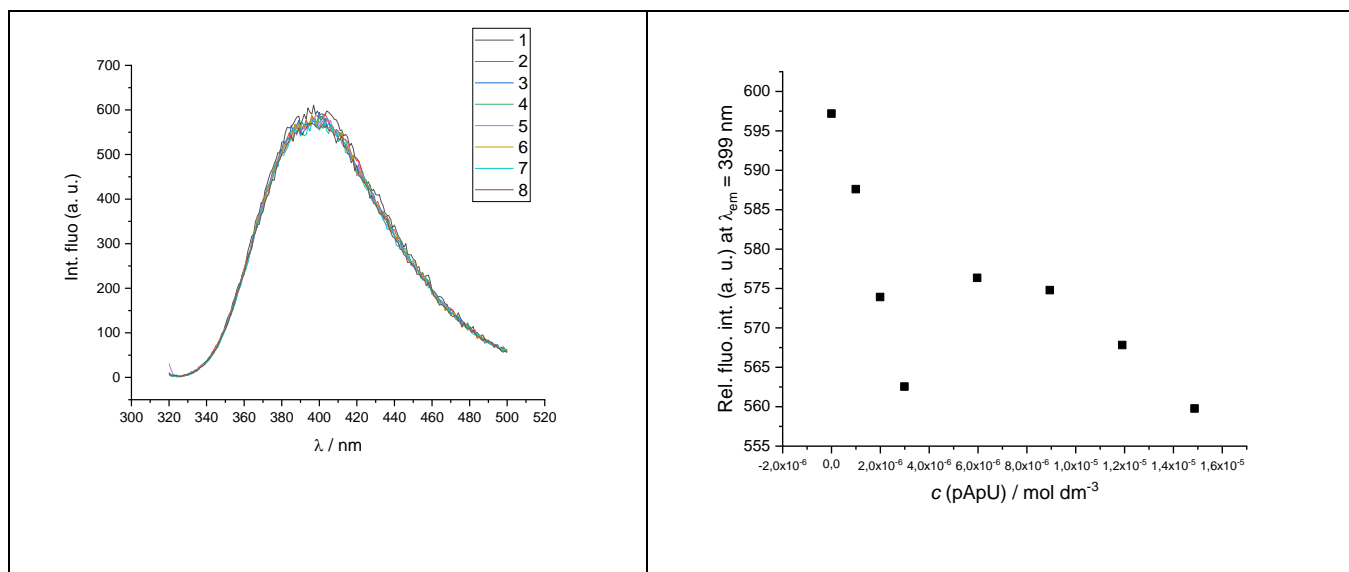

Figure S27. a) Changes in fluorescence spectrum of **16a** ( $c = 1 \times 10^{-6} \text{ mol dm}^{-3}$ ,  $\lambda_{\text{exc}} = 313 \text{ nm}$ ) upon titration with poly A-poly U ( $c = 1.0 \times 10^{-6} - 1.5 \times 10^{-5} \text{ mol dm}^{-3}$ ); b) Dependence of **16a** absorbance at  $\lambda = 399 \text{ nm}$  on  $c$  (poly A-poly U), at pH=7, sodium cacodylate buffer,  $I = 0.05 \text{ mol dm}^{-3}$ .

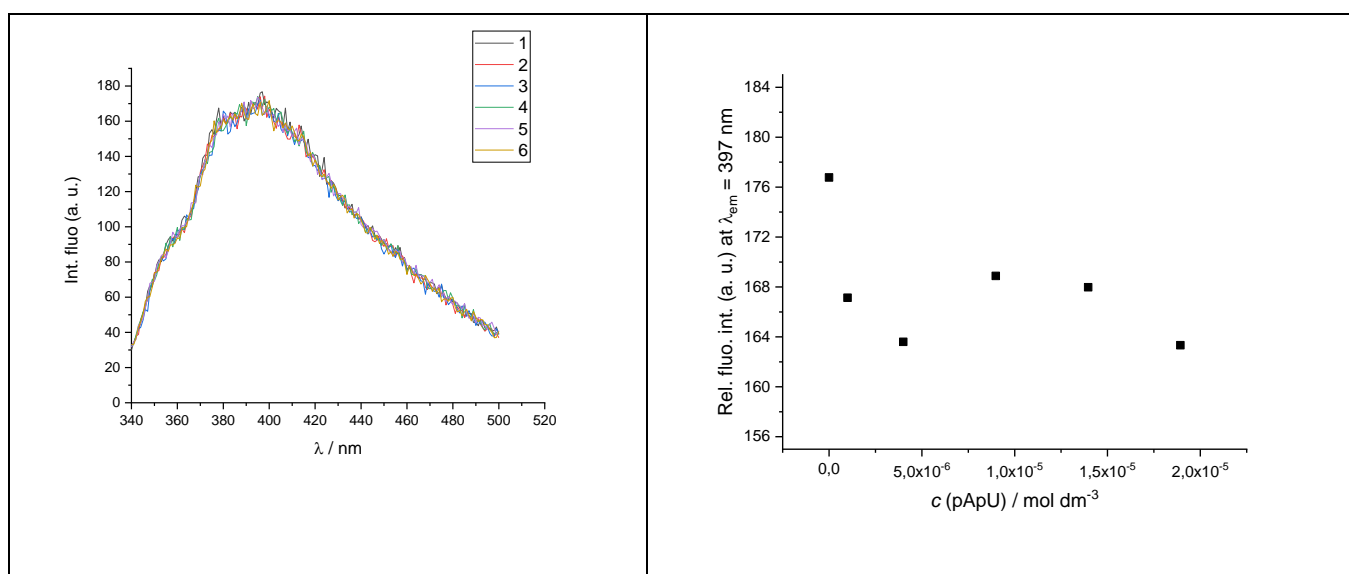

Figure S28. a) Changes in fluorescence spectrum of **15c** ( $c = 1 \times 10^{-6} \text{ mol dm}^{-3}$ ,  $\lambda_{\text{exc}} = 317 \text{ nm}$ ) upon titration with poly A-poly U ( $c = 1.0 \times 10^{-6} - 1.9 \times 10^{-5} \text{ mol dm}^{-3}$ ); b) Dependence of **15c** absorbance at  $\lambda = 397 \text{ nm}$  on  $c$  (poly A-poly U), at pH=7, sodium cacodylate buffer,  $I = 0.05 \text{ mol dm}^{-3}$ .



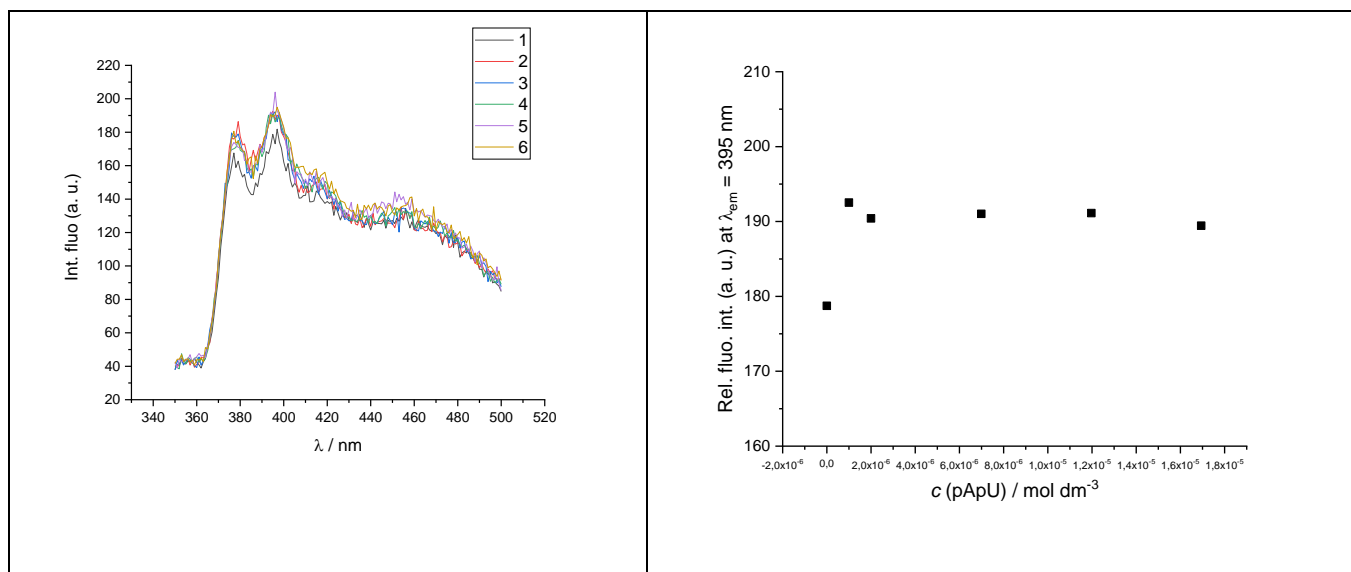

Figure S29. a) Changes in fluorescence spectrum of **16c** ( $c = 1 \times 10^{-6}$  mol dm<sup>-3</sup>,  $\lambda_{exc} = 317$  nm) upon titration with poly A-poly U ( $c = 1.0 \times 10^{-6} - 1.7 \times 10^{-5}$  mol dm<sup>-3</sup>); b) Dependence of **16c** absorbance at  $\lambda = 395$  nm on  $c$ (poly A-poly U), at pH=7, sodium cacodylate buffer,  $l = 0.05$  mol dm<sup>-3</sup>.

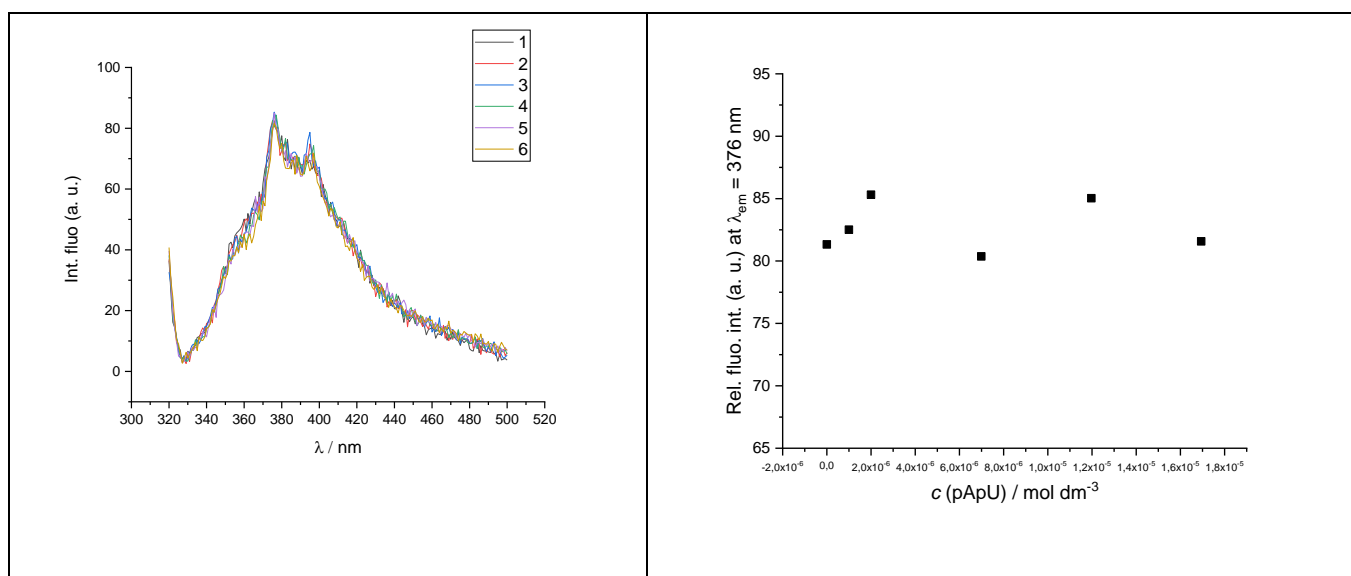

Figure S30. a) Changes in fluorescence spectrum of **15b** ( $c = 1 \times 10^{-6}$  mol dm<sup>-3</sup>,  $\lambda_{exc} = 312$  nm) upon titration with poly A-poly U ( $c = 1.0 \times 10^{-6} - 1.7 \times 10^{-5}$  mol dm<sup>-3</sup>); b) Dependence of **15b** absorbance at  $\lambda = 376$  nm on  $c$ (poly A-poly U), at pH=7, sodium cacodylate buffer,  $l = 0.05$  mol dm<sup>-3</sup>.

### 3.2. Thermal melting experiments

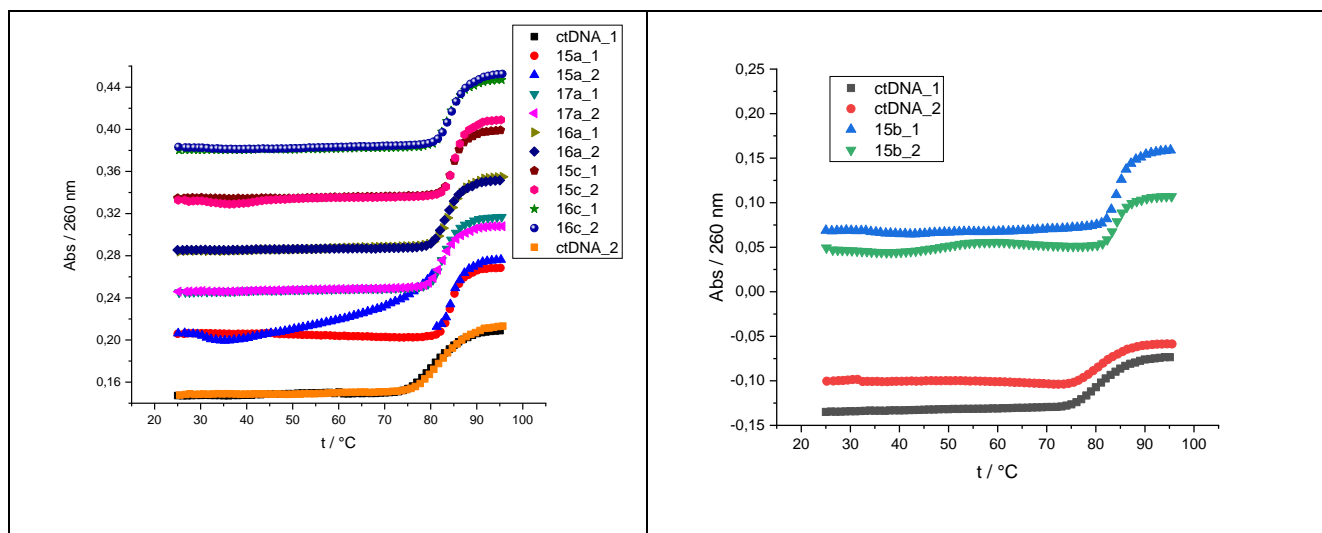

Figure S31. Melting curve of ctDNA upon addition of ratio,  $r$  ( [compound/ [polynucleotide]])=0.3 of **15a-c, 16a, 16c, 17a, 21a** and **21b** at pH = 7.0 (buffer sodium cacodylate,  $I = 0.05 \text{ mol dm}^{-3}$ ).

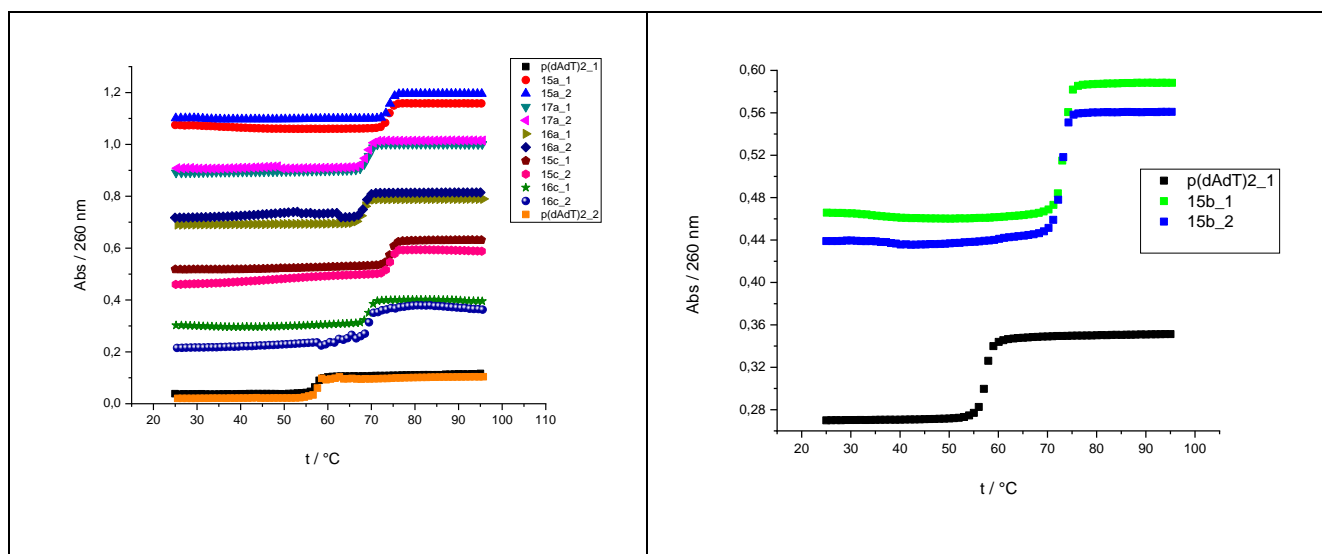

Figure S32. Melting curve of  $p(dAdT)_2$  upon addition of ratio,  $r$  ( [compound/ [polynucleotide]])=0.3 of **15a-c, 16a, 16c** and **17a** at pH = 7.0 (buffer sodium cacodylate,  $I = 0.05 \text{ mol dm}^{-3}$ ).

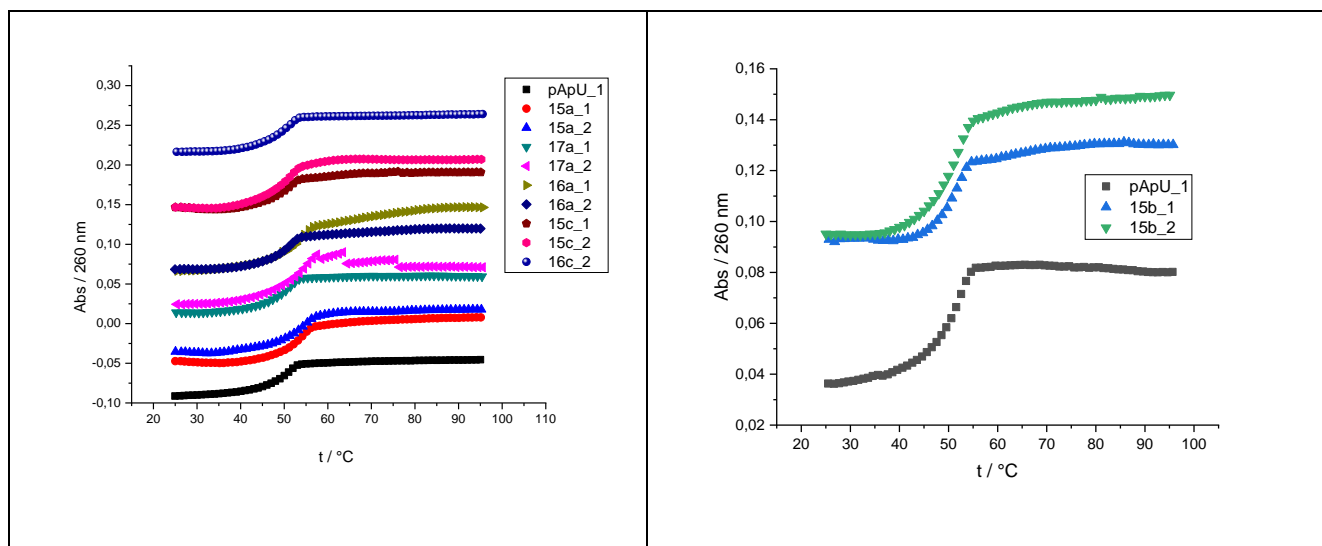

Figure S33. Melting curve of poly A – poly U upon addition of ratio,  $r$  ( [compound/ [polynucleotide] )=0.3 of **15a-c**, **16a**, **16c** and **17a** at pH = 7.0 (buffer sodium cacodylate,  $I = 0.05 \text{ mol dm}^{-3}$ ).

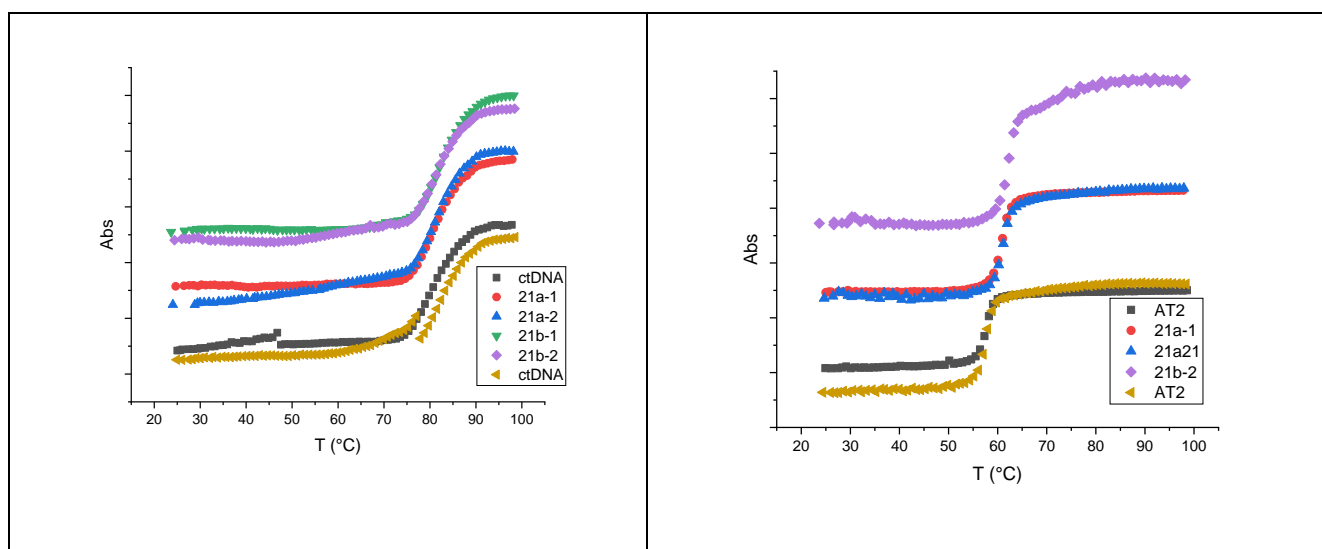

Figure S34. Melting curve of ctDNA and poly(dAdT)<sub>2</sub> upon addition of ratio,  $r$  ( [compound/ [polynucleotide] )=0.3 of **21a** and **21b** at pH = 7.0 (buffer sodium cacodylate,  $I = 0.05 \text{ mol dm}^{-3}$ ).

### 3.3. Circular dichroism (CD) titrations

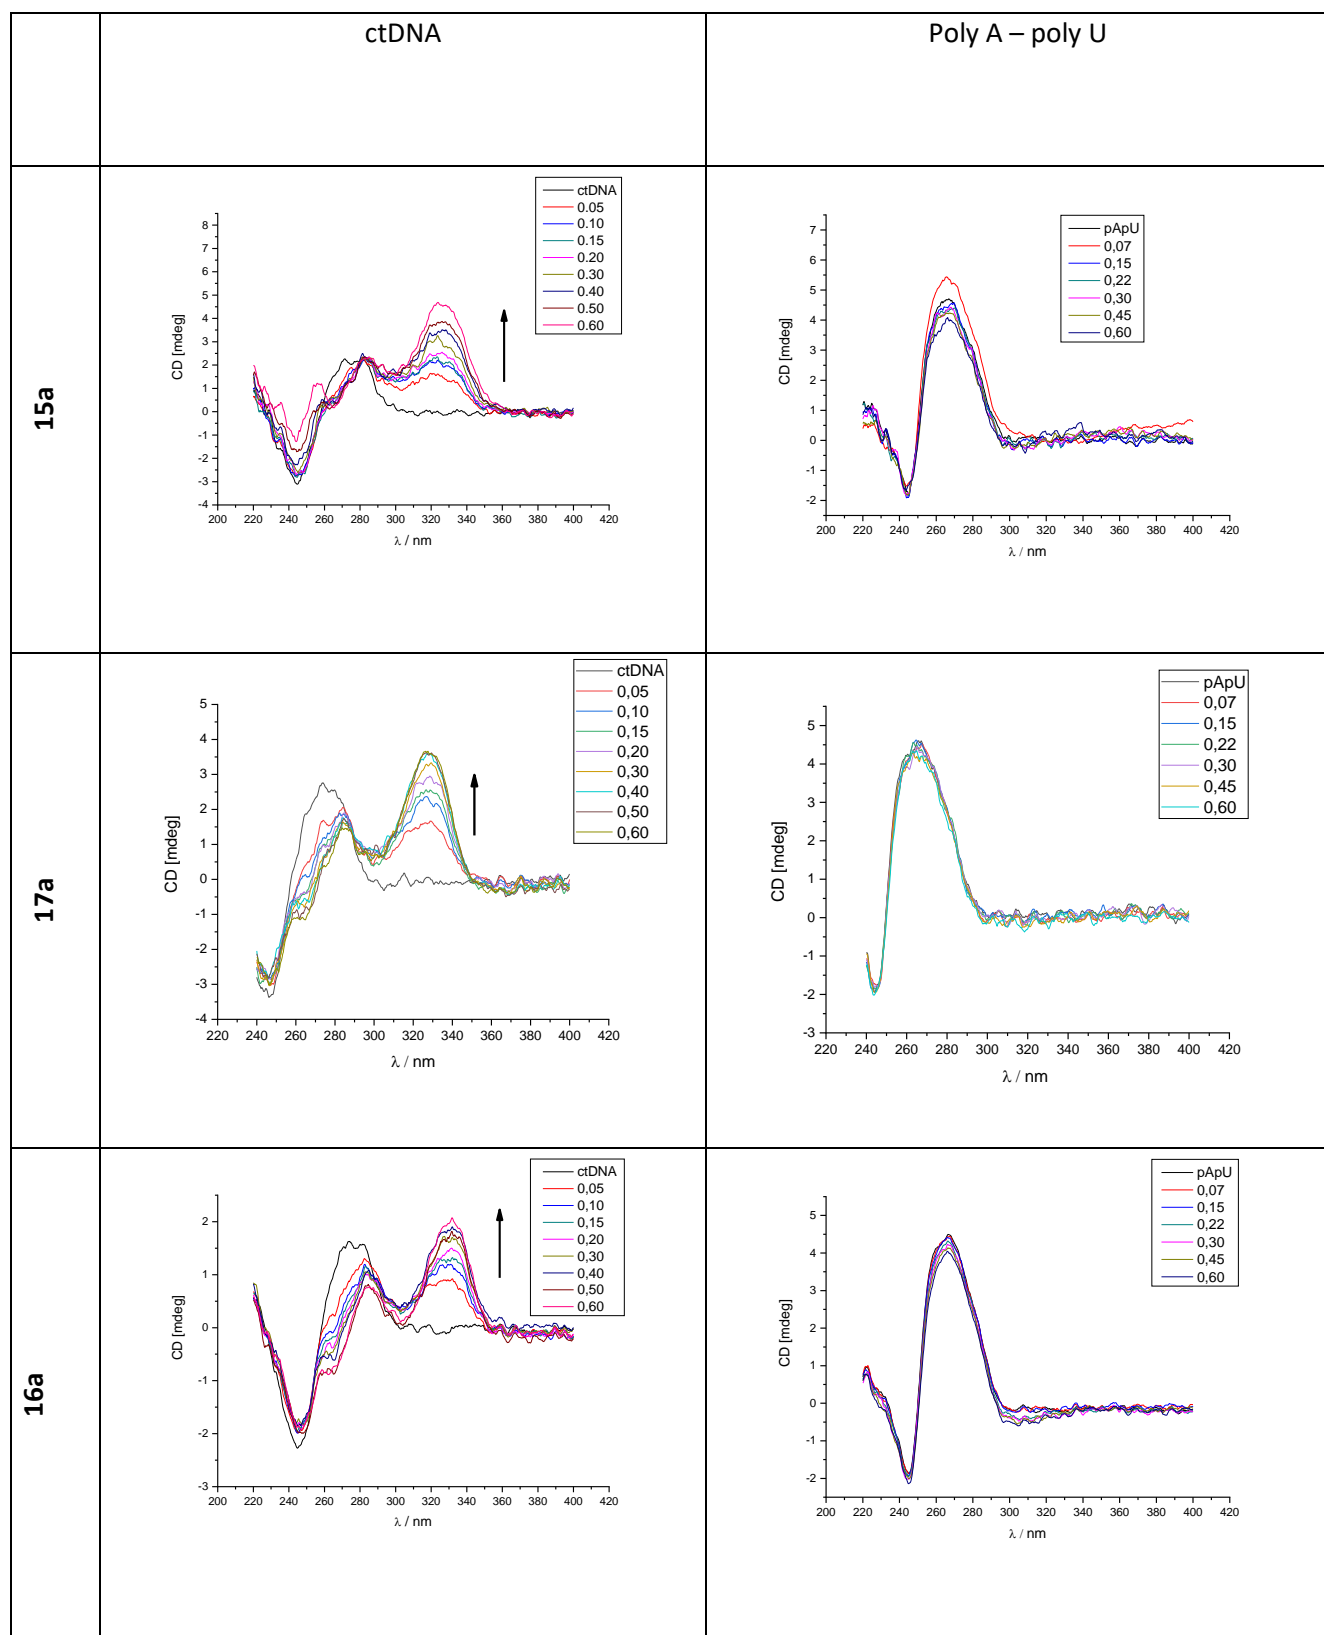

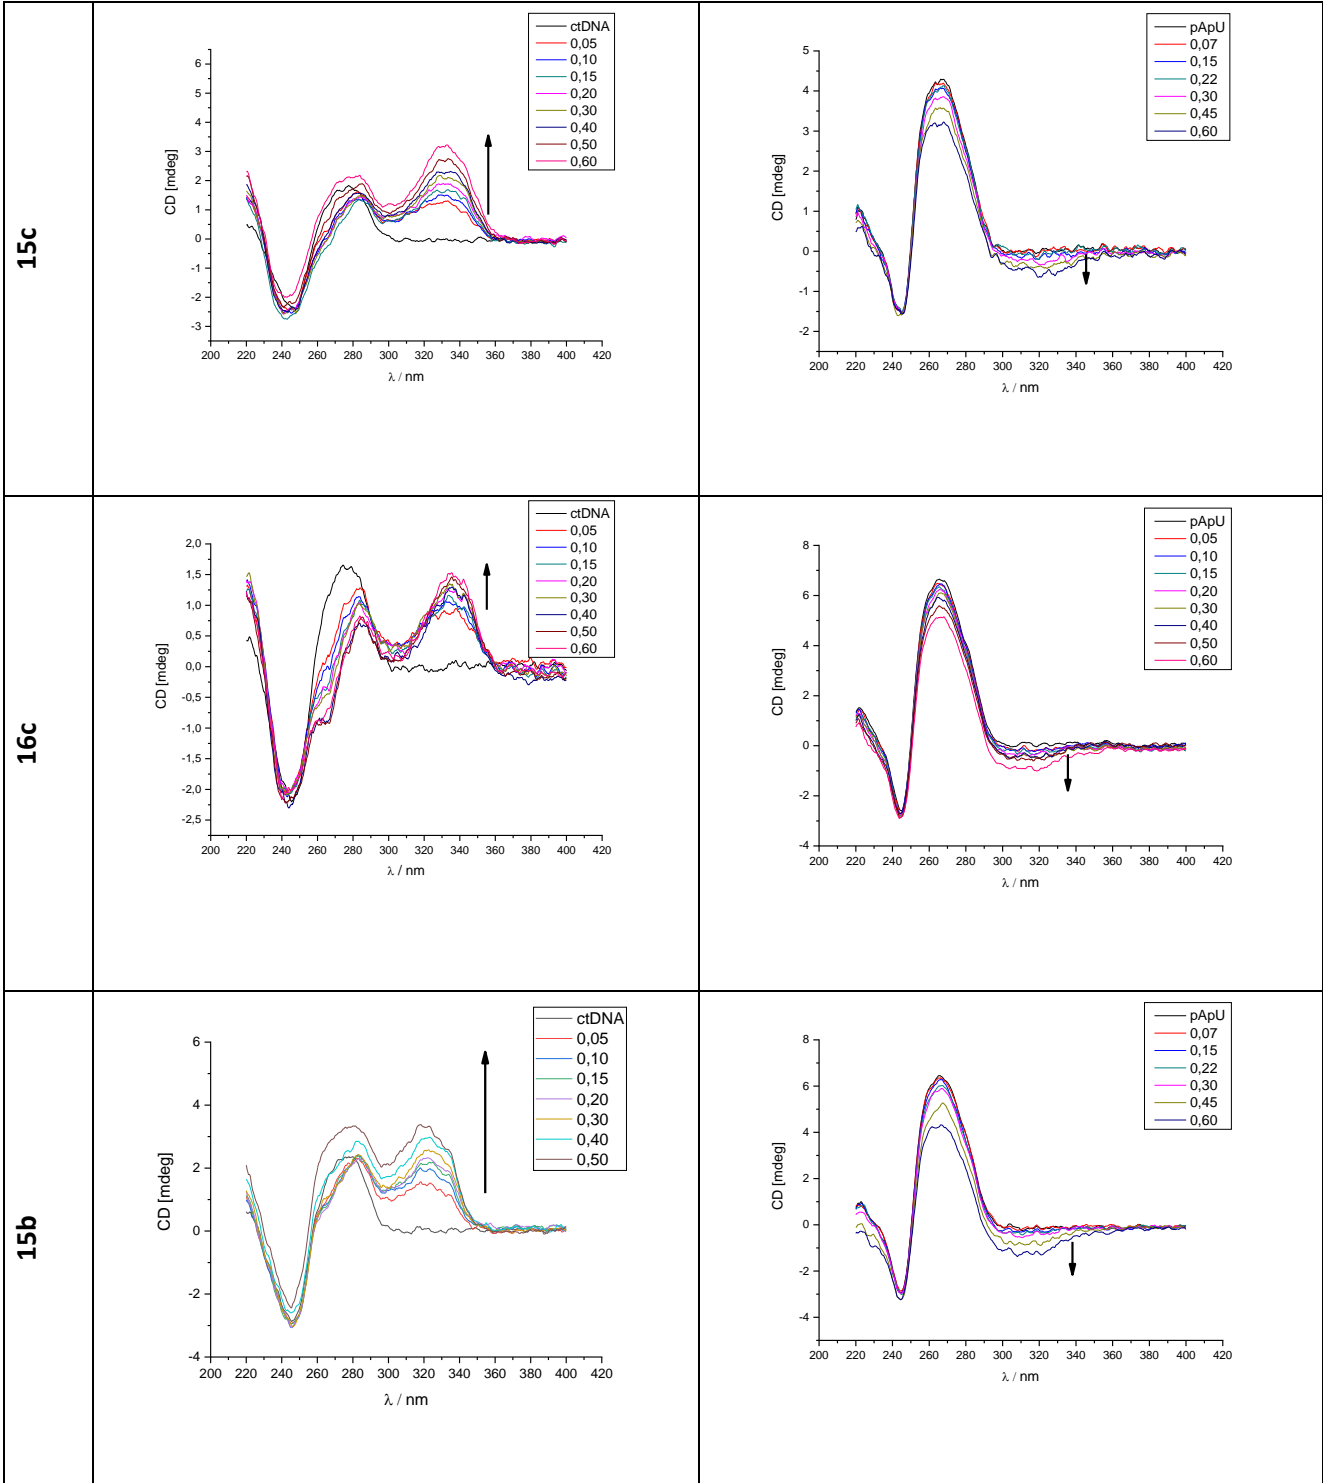

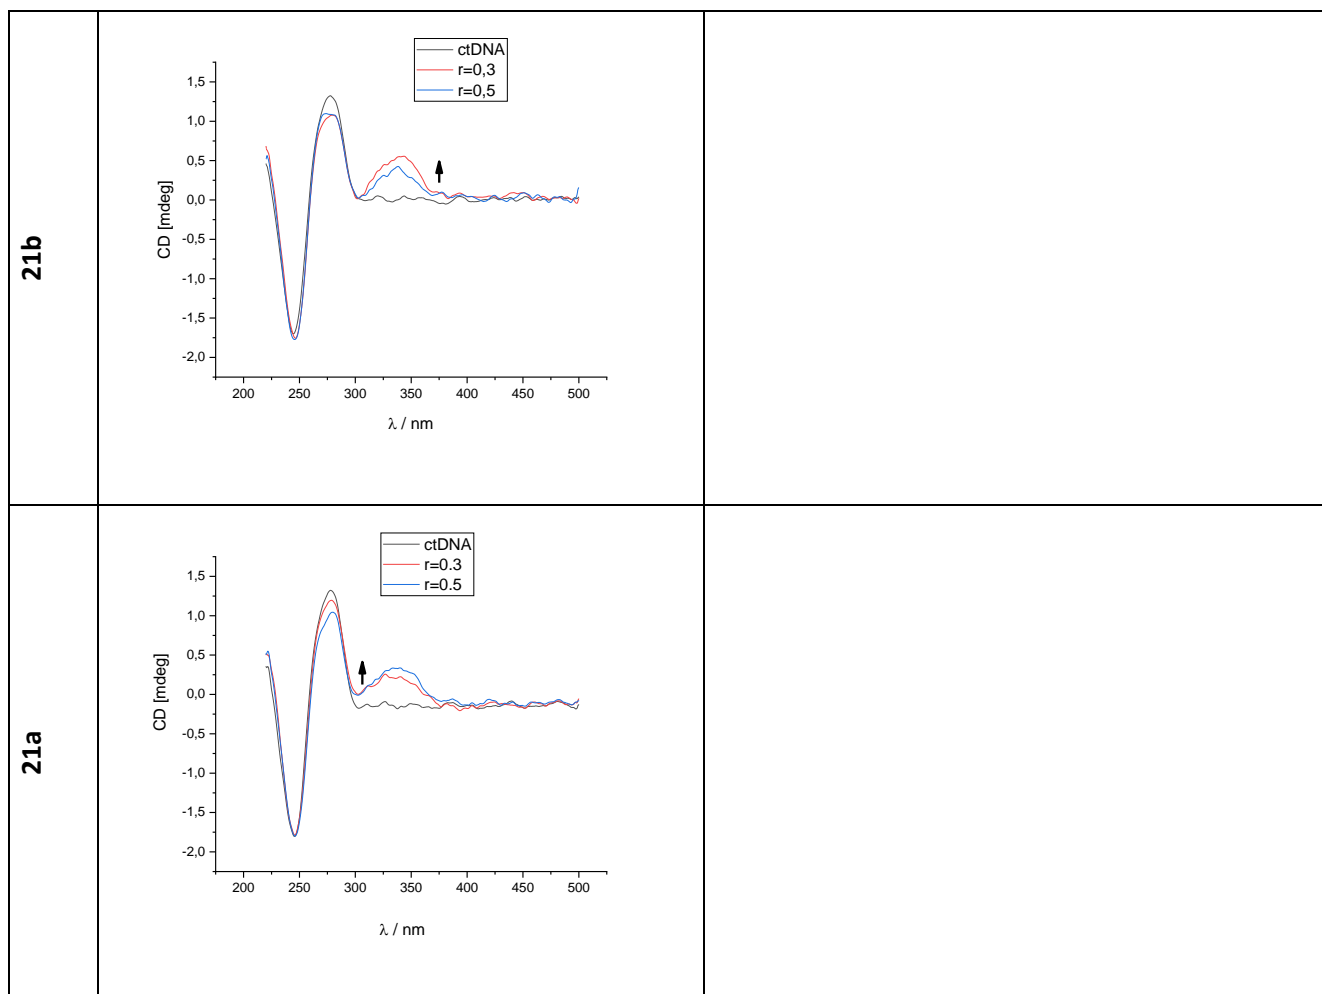

Figure S35. CD titration of ctDNA ( $c = 3.0 \times 10^{-5} \text{ mol dm}^{-3}$ ) and poly A-poly U ( $c = 3.0 \times 10^{-5} \text{ mol dm}^{-3}$ ) with **15a-c**, **16a**, **16c**, **17a**, **21a** and **21b** at molar ratios  $r = [\text{compound}] / [\text{polynucleotide}]$  (pH = 7.0, buffer sodium cacodylate,  $I = 0.05 \text{ mol dm}^{-3}$ ).

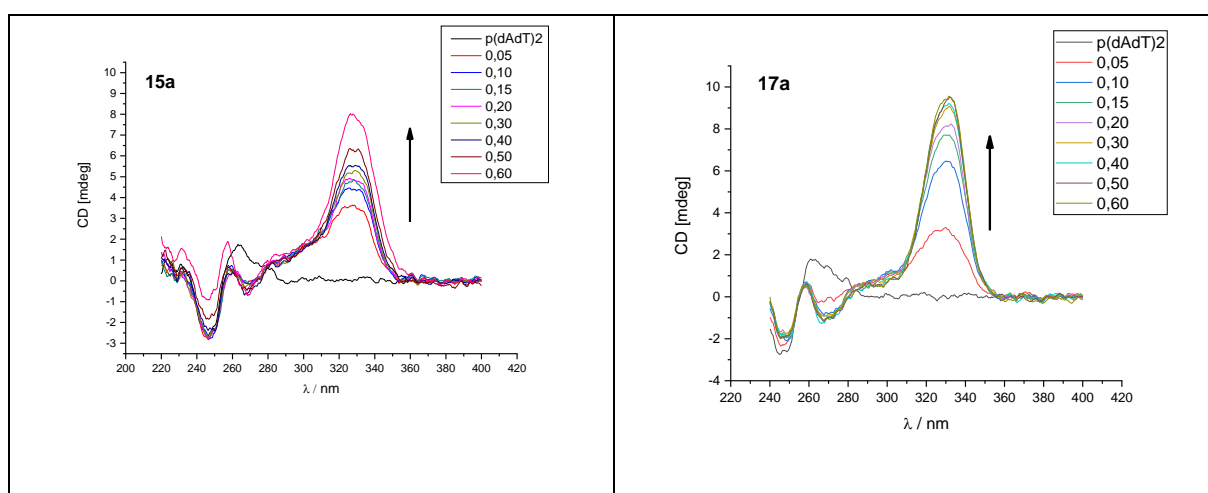

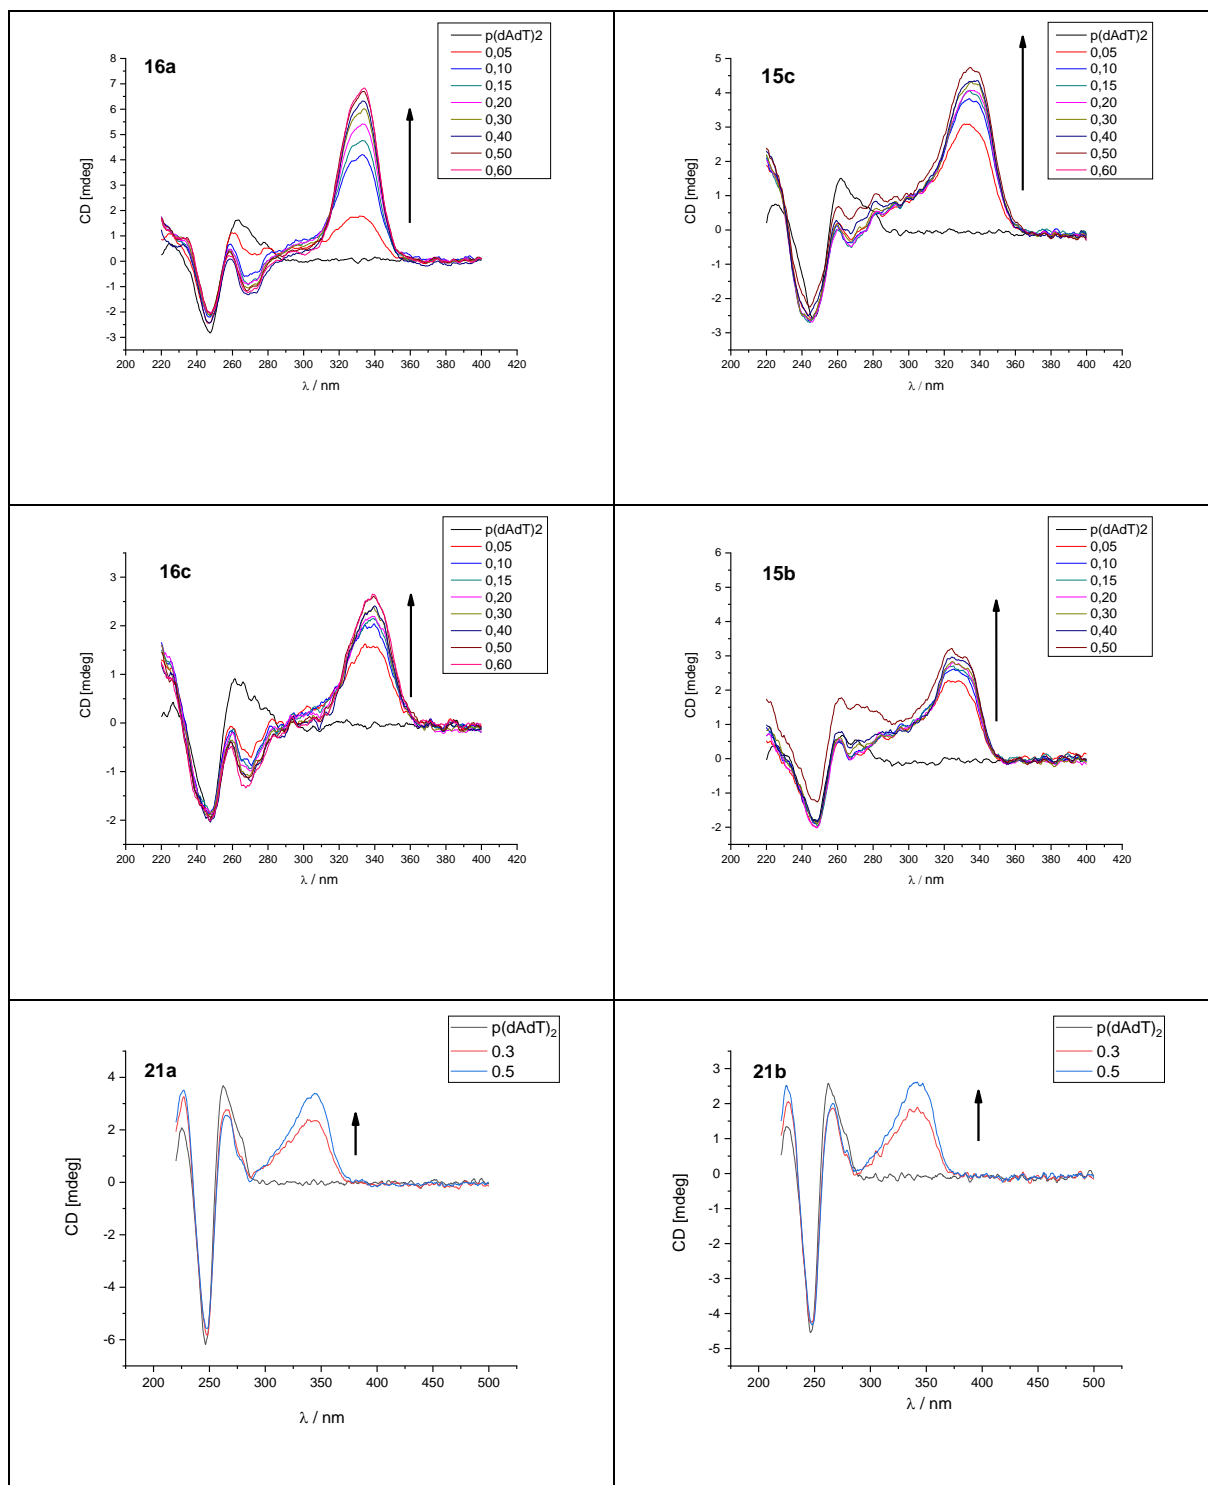

Figure S36. CD titration of poly(dAdT)<sub>2</sub> ( $c = 3.0 \times 10^{-5} \text{ mol dm}^{-3}$ ) with **15a-c**, **16a**, **16c**, **17a**, **21a** and **21b** at molar ratios  $r = [\text{compound}] / [\text{polynucleotide}]$  (pH = 7.0, buffer sodium cacodylate,  $I = 0.05 \text{ mol dm}^{-3}$ ).

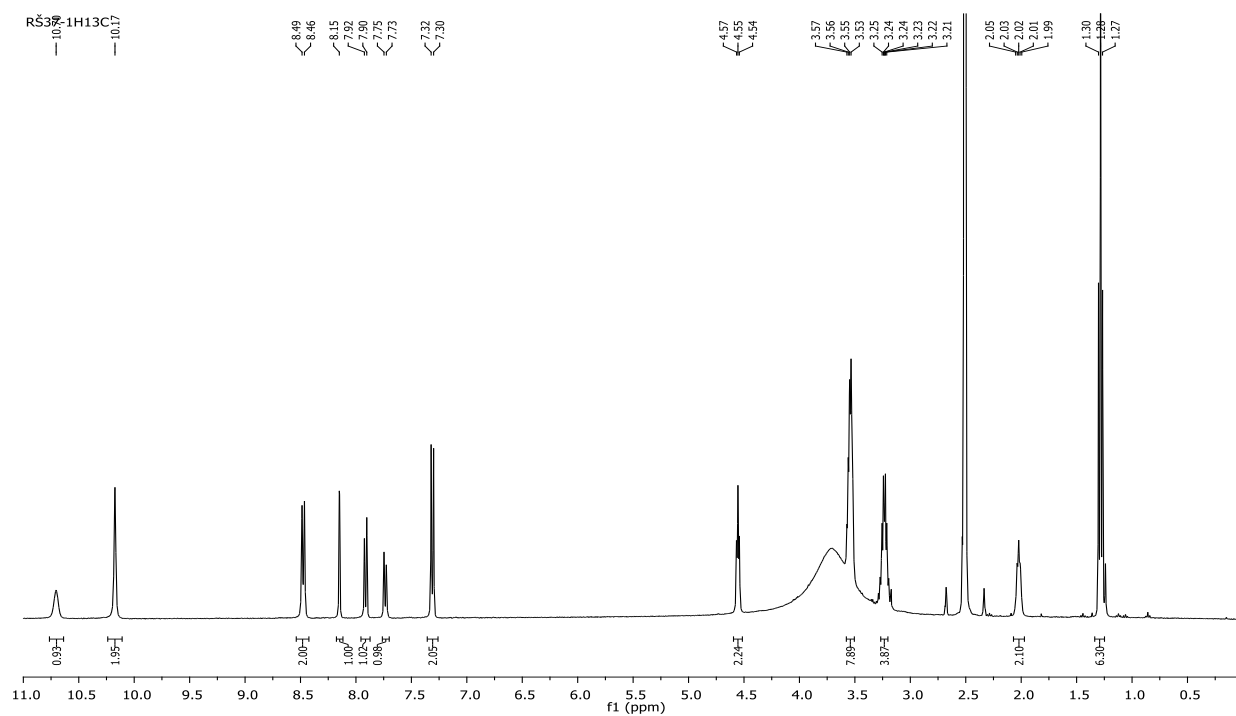

$^1\text{H}$  NMR (400 MHz, DMSO)  $\delta$  spectrum of 2-(4-(2-(Diethylamino)ethoxy)phenyl)-5(6)-(3,4,5,6-tetrahydropyrimidin-2-yl)-1H-benzimidazole dihydrochloride (**12a**)

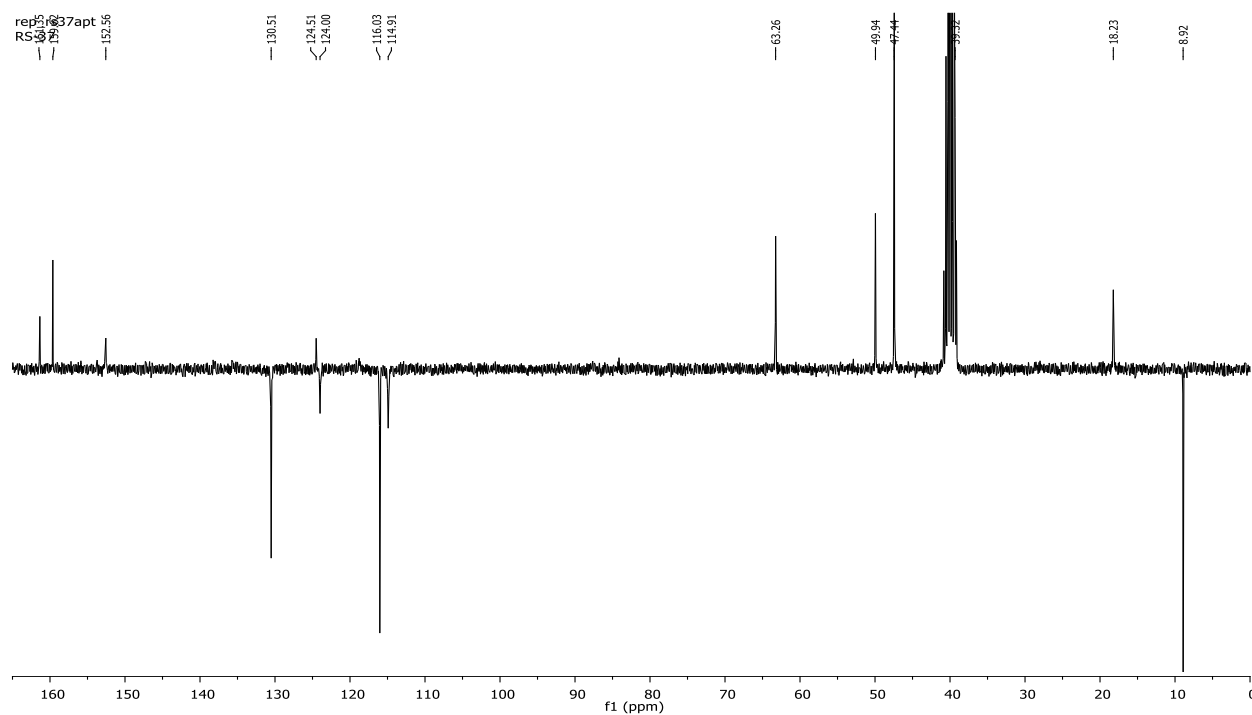

$^{13}\text{C}$  NMR (75 MHz, DMSO)  $\delta$  spectrum of 2-(4-(2-(Diethylamino)ethoxy)phenyl)-5(6)-(3,4,5,6-tetrahydropyrimidin-2-yl)-1H-benzimidazole dihydrochloride (**12a**)



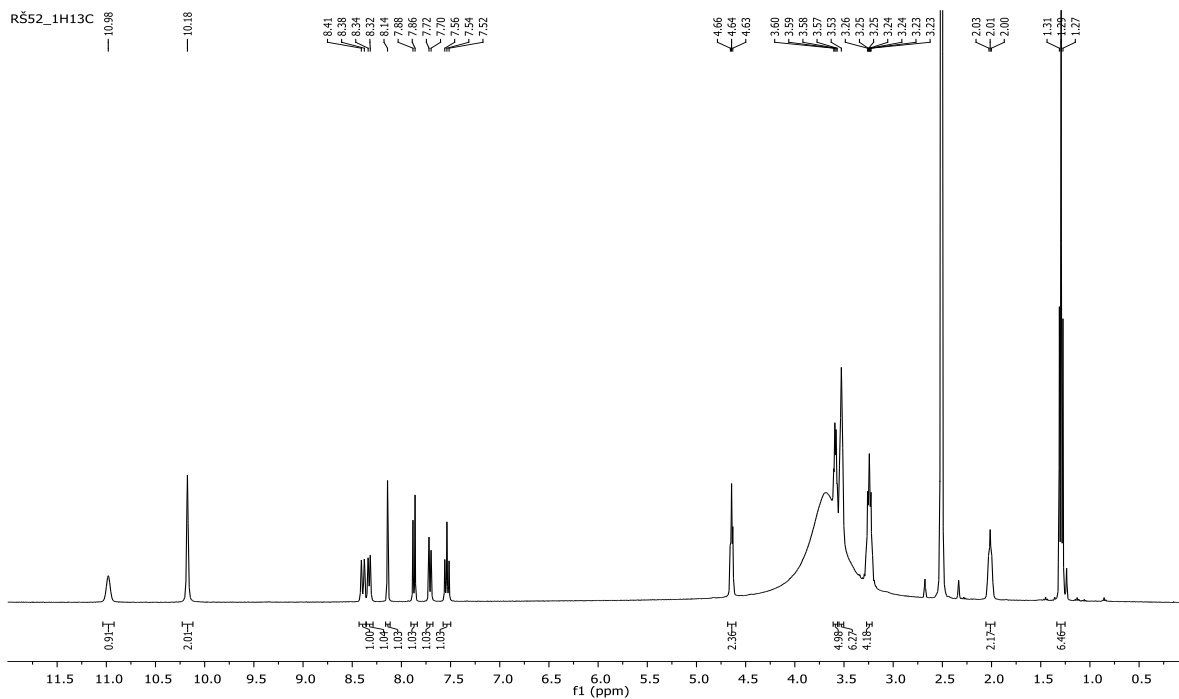

$^1\text{H}$  NMR (400 MHz, DMSO)  $\delta$  spectrum of 2-(4-(2-(Diethylamino)ethoxy)-3-fluorophenyl)-5(6)-(3,4,5,6-tetrahydropyrimidin-2-yl)-1H-benzimidazole dihydrochloride (**12b**)

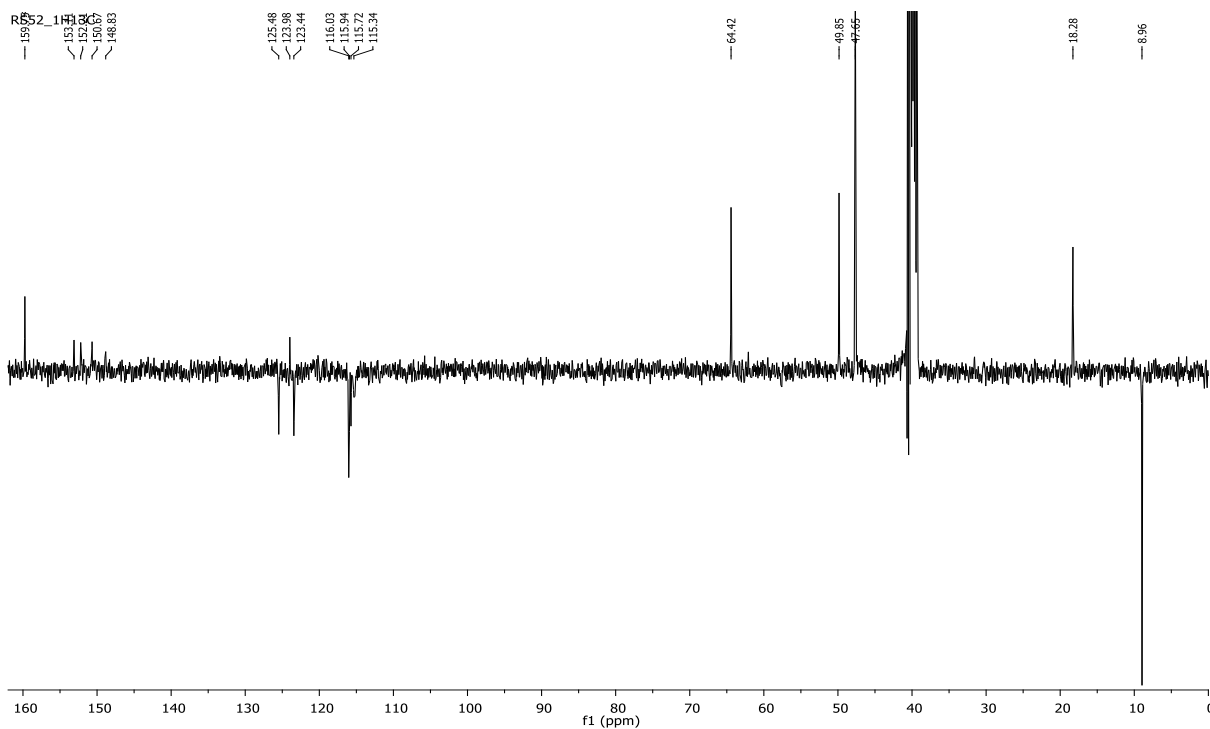

$^{13}\text{C}$  NMR (101 MHz, DMSO)  $\delta$  spectrum of 2-(4-(2-(Diethylamino)ethoxy)-3-fluorophenyl)-5(6)-(3,4,5,6-tetrahydropyrimidin-2-yl)-1H-benzimidazole dihydrochloride (**12b**)

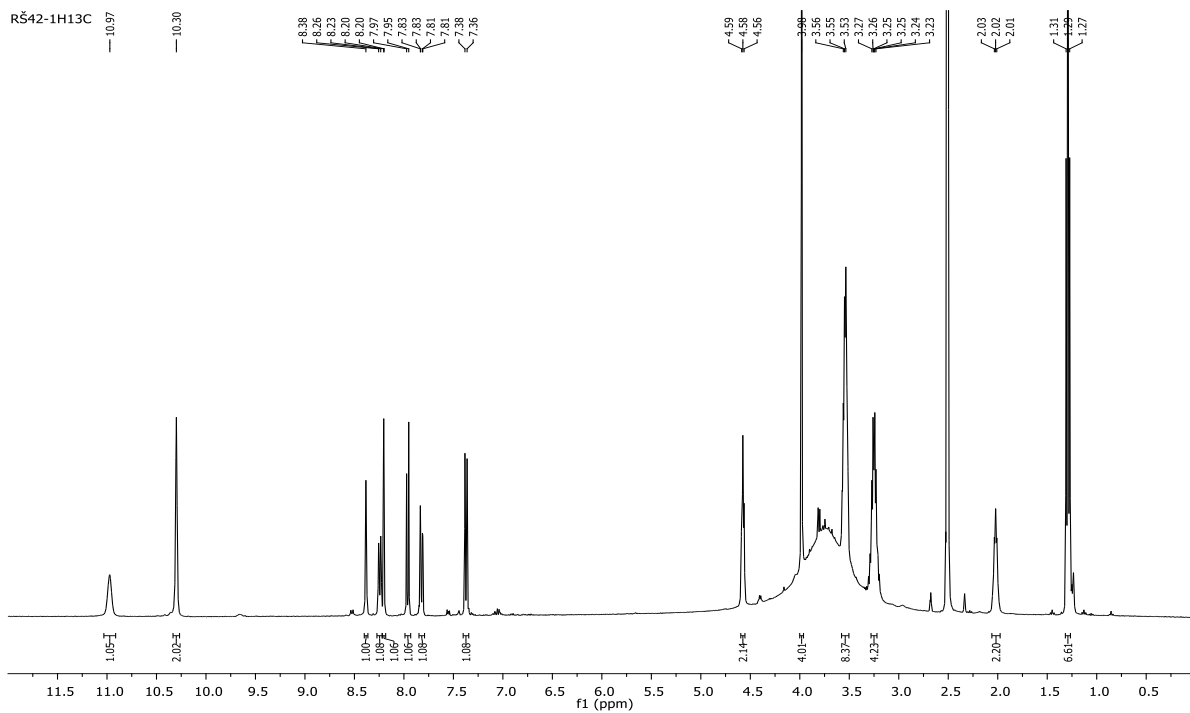

$^1\text{H}$  NMR (400 MHz, DMSO)  $\delta$  spectrum of 2-(4-(2-(Diethylamino)ethoxy)-3-methoxyphenyl)-5(6)-(3,4,5,6-tetrahydropyrimidin-2-yl)-1H-benzimidazole dihydrochloride (**12c**)

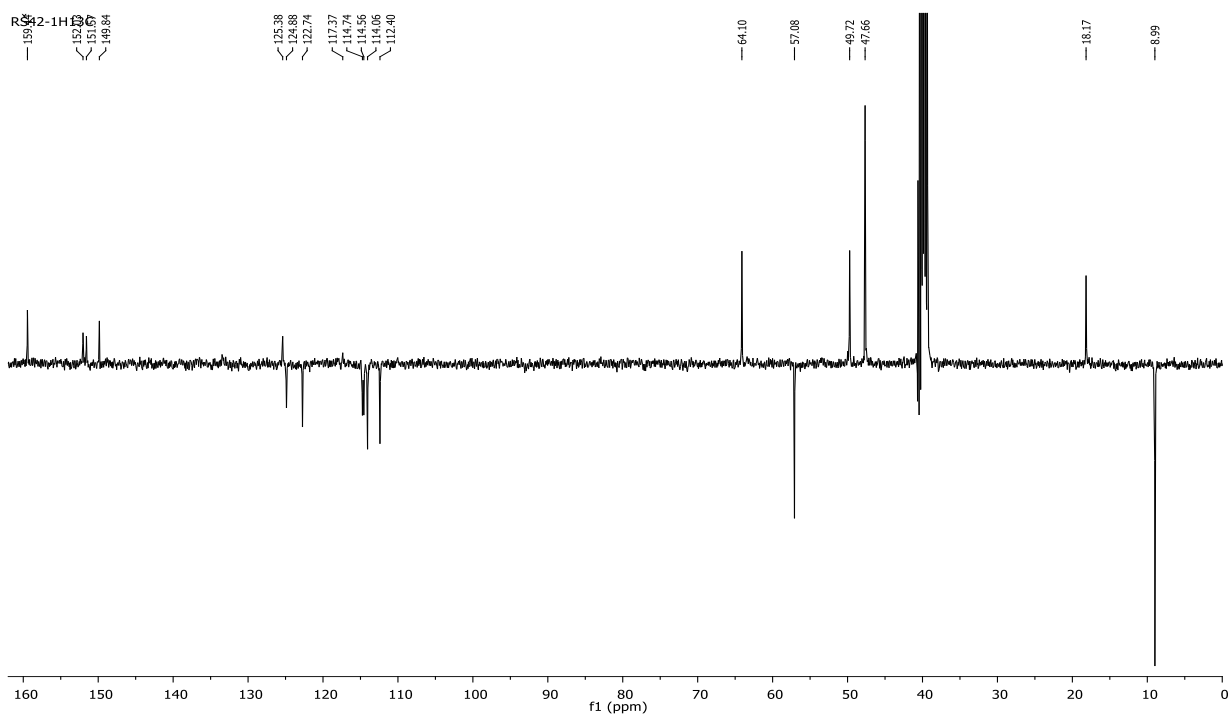

$^{13}\text{C}$  NMR (75 MHz, DMSO)  $\delta$  spectrum of 2-(4-(2-(Diethylamino)ethoxy)-3-methoxyphenyl)-5(6)-(3,4,5,6-tetrahydropyrimidin-2-yl)-1H-benzimidazole dihydrochloride (**12c**)

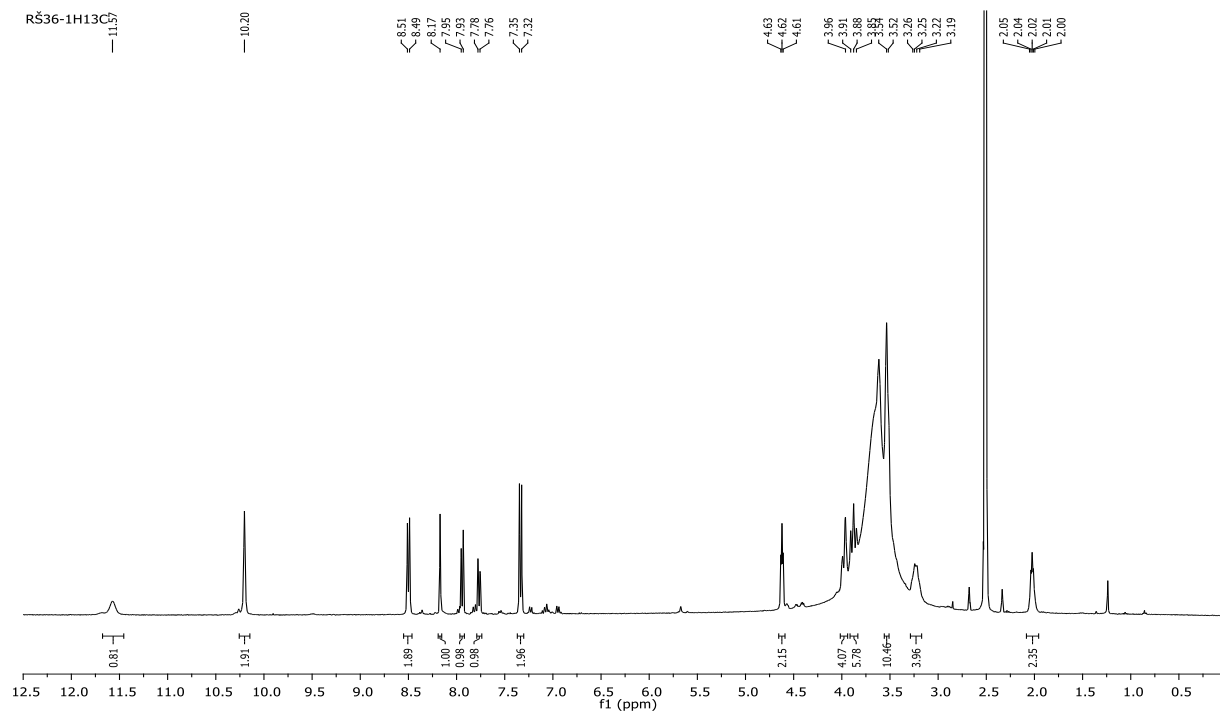

$^1\text{H}$  NMR (400 MHz, DMSO)  $\delta$  spectrum of 2-(4-(2-Morpholinoethoxy)phenyl)-5(6)-(3,4,5,6-tetrahydropyrimidin-2-yl)-1H-benzimidazole dihydrochloride (**13a**)

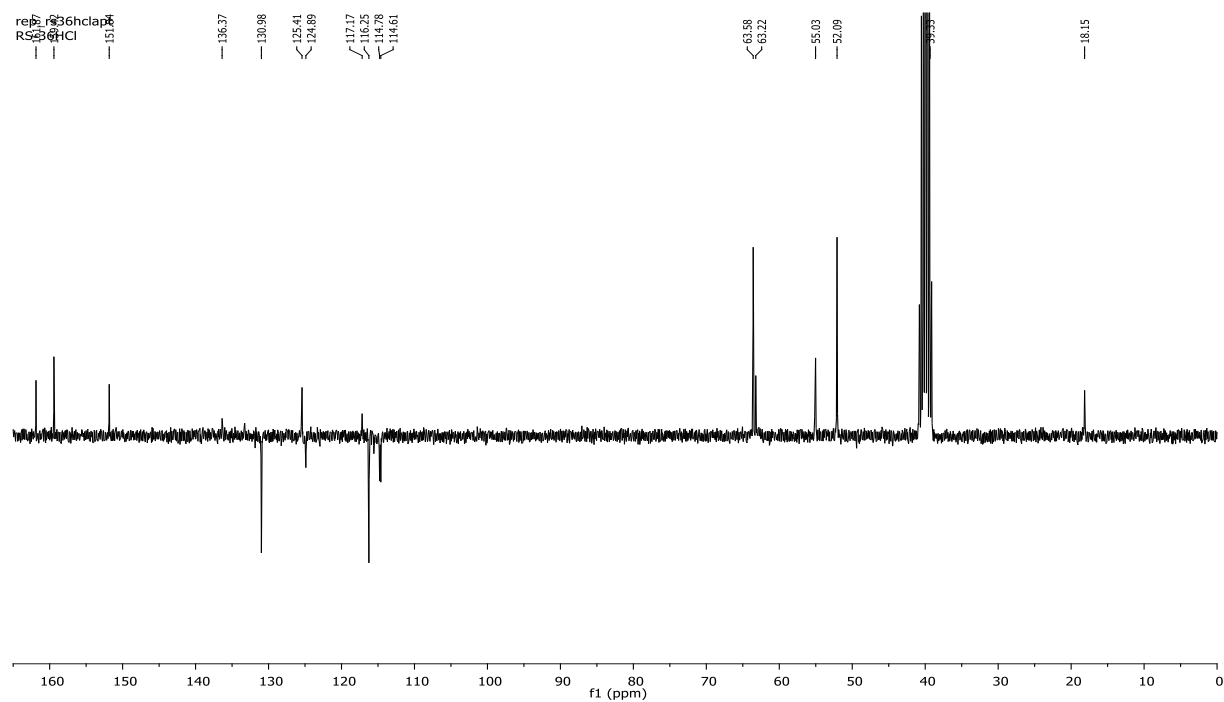

$^{13}\text{C}$  NMR (75 MHz, DMSO)  $\delta$  spectrum of 2-(4-(2-Morpholinoethoxy)phenyl)-5(6)-(3,4,5,6-tetrahydropyrimidin-2-yl)-1H-benzimidazole dihydrochloride (**13a**)

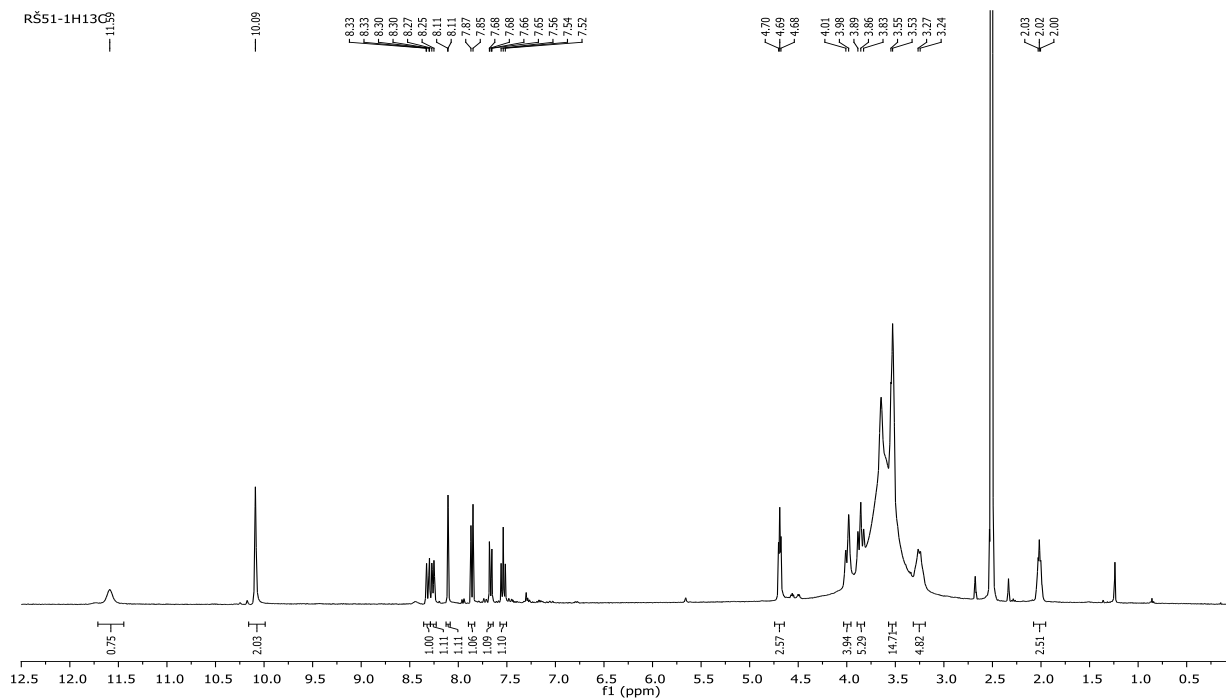

$^1\text{H}$  NMR (400 MHz, DMSO)  $\delta$  spectrum of 2-(3-Fluoro-4-(2-morpholinoethoxy)phenyl)-5(6)-(3,4,5,6-tetrahydropyrimidin-2-yl)-1H-benzimidazole dihydrochloride (**13b**)

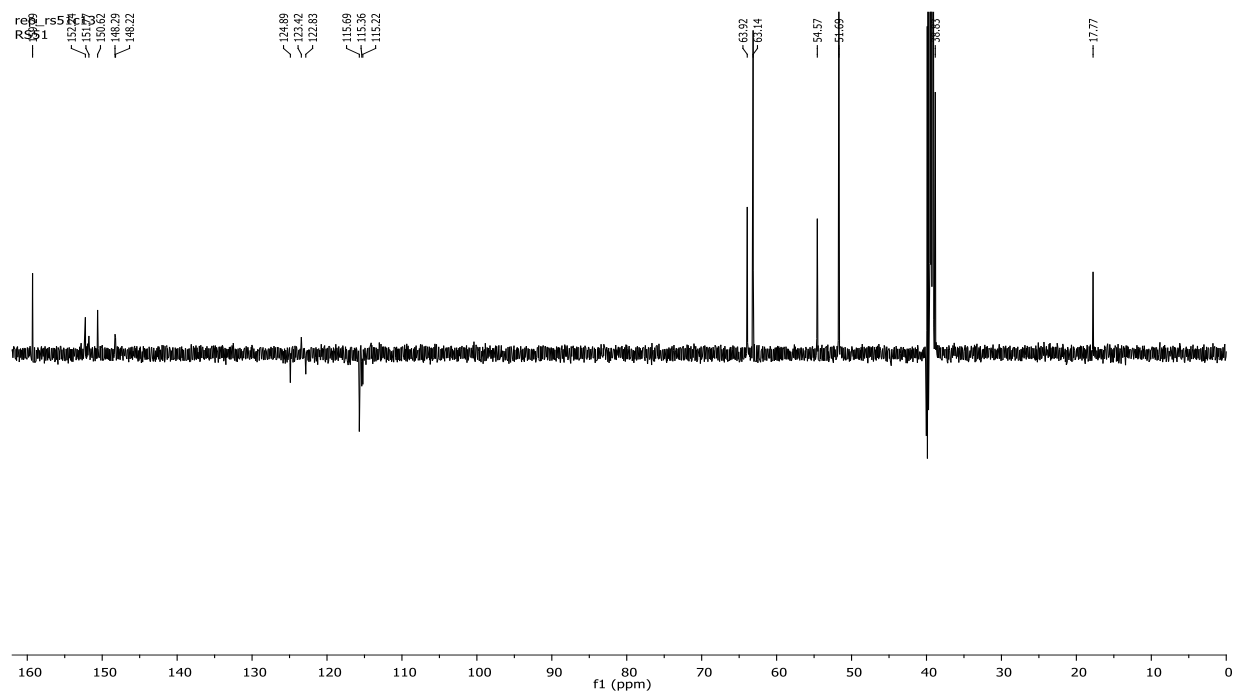

$^{13}\text{C}$  NMR (151 MHz, DMSO)  $\delta$  spectrum of 2-(3-Fluoro-4-(2-morpholinoethoxy)phenyl)-5(6)-(3,4,5,6-tetrahydropyrimidin-2-yl)-1H-benzimidazole dihydrochloride (**13b**)

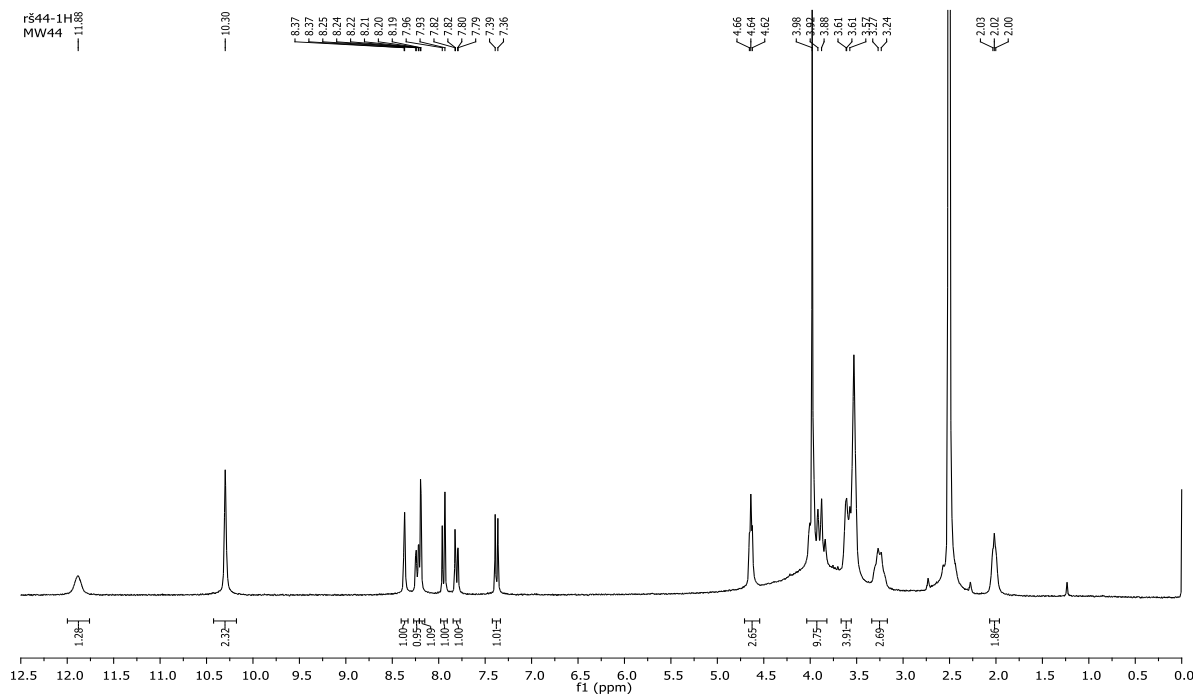

$^1\text{H}$  NMR (300 MHz, DMSO)  $\delta$  spectrum of 2-(3-Methoxy-4-(2-morpholinoethoxy)phenyl)-5(6)-(3,4,5,6-tetrahydropyrimidin-2-yl)-1H-benzimidazole dihydrochloride (**13c**)

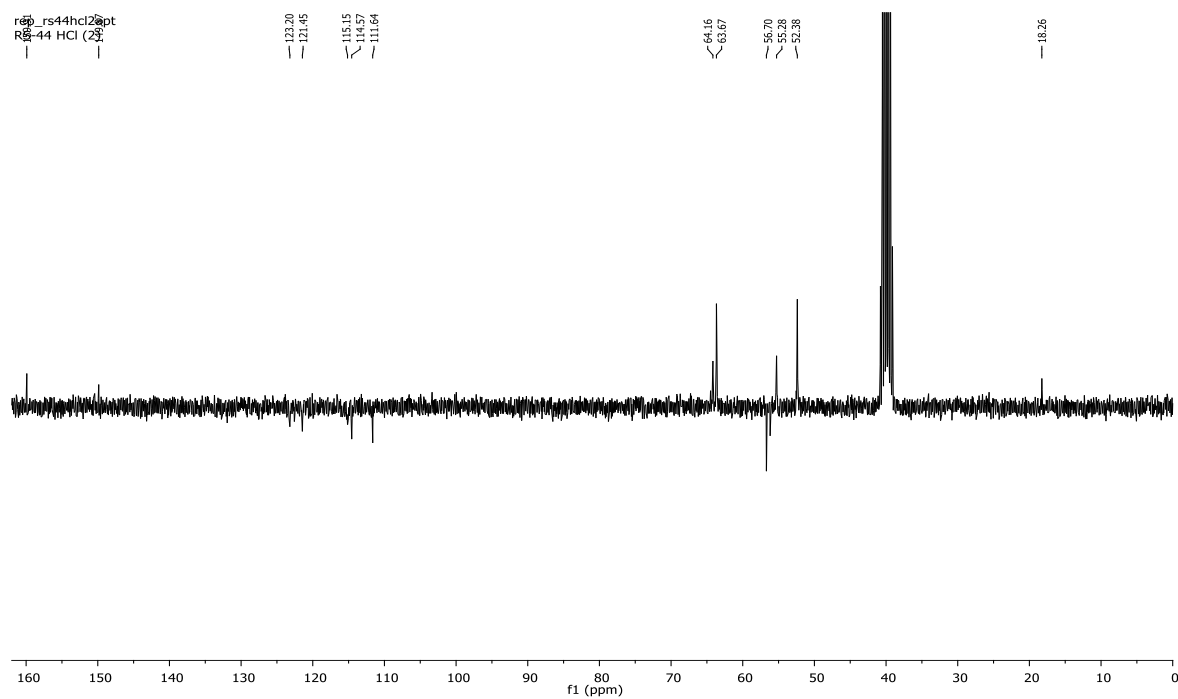

$^{13}\text{C}$  NMR (75 MHz, DMSO)  $\delta$  spectrum of 2-(3-Methoxy-4-(2-morpholinoethoxy)phenyl)-5(6)-(3,4,5,6-tetrahydropyrimidin-2-yl)-1H-benzimidazole dihydrochloride (**13c**)

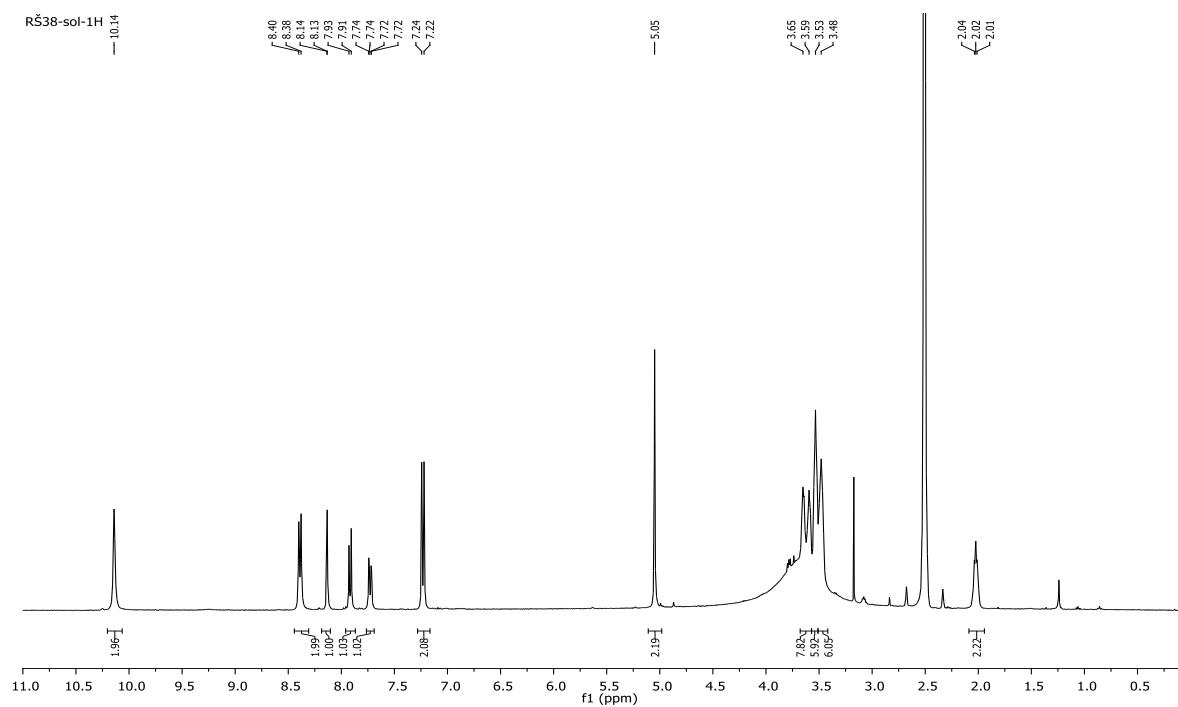

$^1\text{H}$  NMR (400 MHz, DMSO)  $\delta$  spectrum of 2-(4-(2-Morpholino-2-oxoethoxy)phenyl)-5(6)-(3,4,5,6-tetrahydropyrimidin-2-yl)-1H- benzimidazole hydrochloride (**14a**)

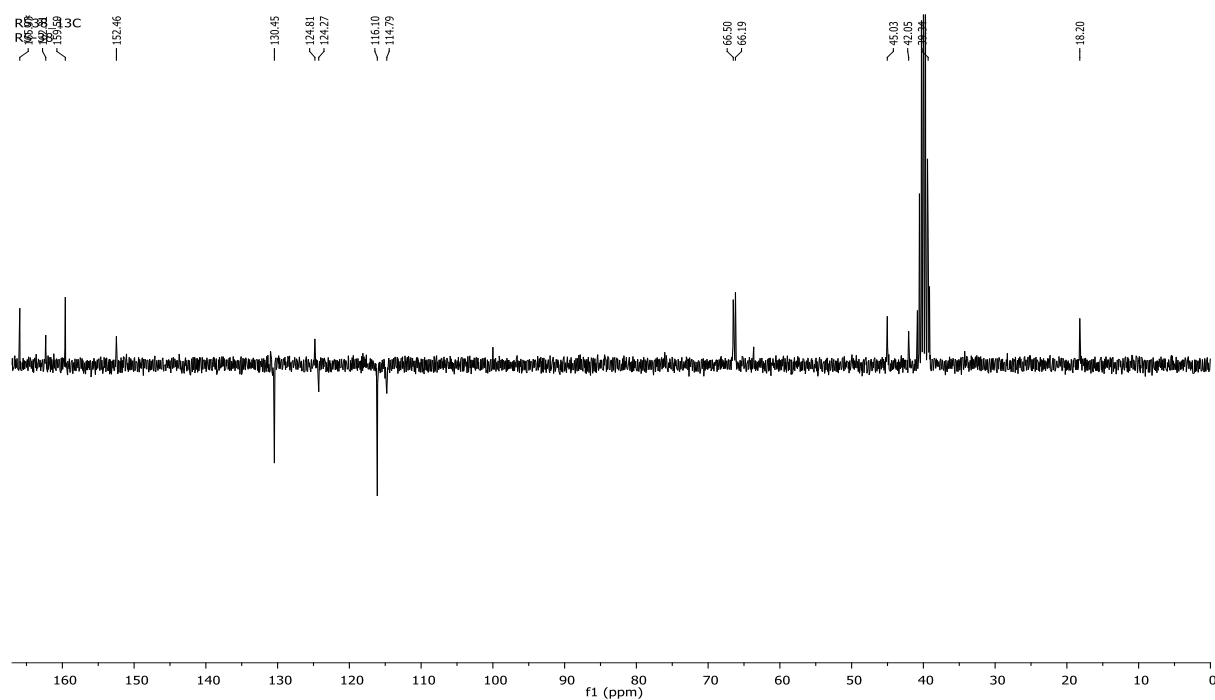

$^{13}\text{C}$  NMR (75 MHz, DMSO)  $\delta$  spectrum of 2-(4-(2-Morpholino-2-oxoethoxy)phenyl)-5(6)-(3,4,5,6-tetrahydropyrimidin-2-yl)-1H- benzimidazole hydrochloride (**14a**)

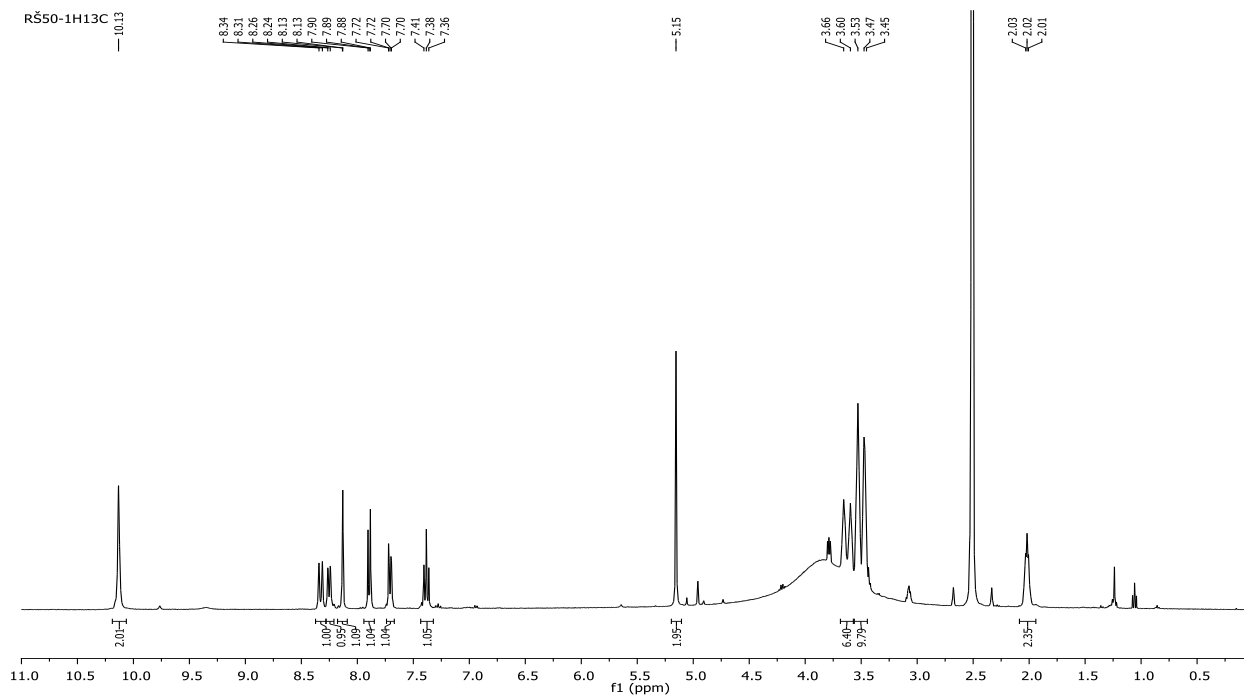

$^1\text{H}$  NMR (400 MHz, DMSO)  $\delta$  spectrum of 2-(3-Fluoro-4-(2-morpholino-2-oxoethoxy)phenyl)-5(6)-(3,4,5,6-tetrahydropyrimidin-2-yl)-1H-benzimidazole hydrochloride (**14b**)

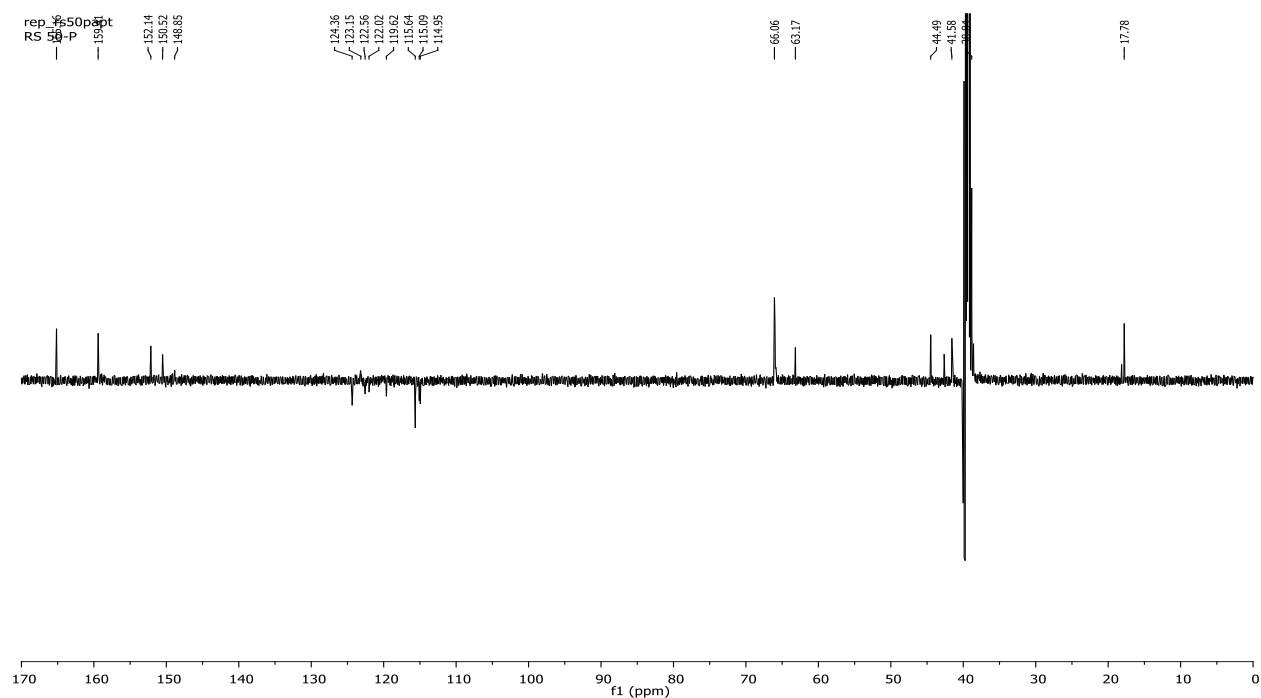

$^{13}\text{C}$  NMR (151 MHz, DMSO)  $\delta$  spectrum of 2-(3-Fluoro-4-(2-morpholino-2-oxoethoxy)phenyl)-5(6)-(3,4,5,6-tetrahydropyrimidin-2-yl)-1H-benzimidazole hydrochloride (**14b**)

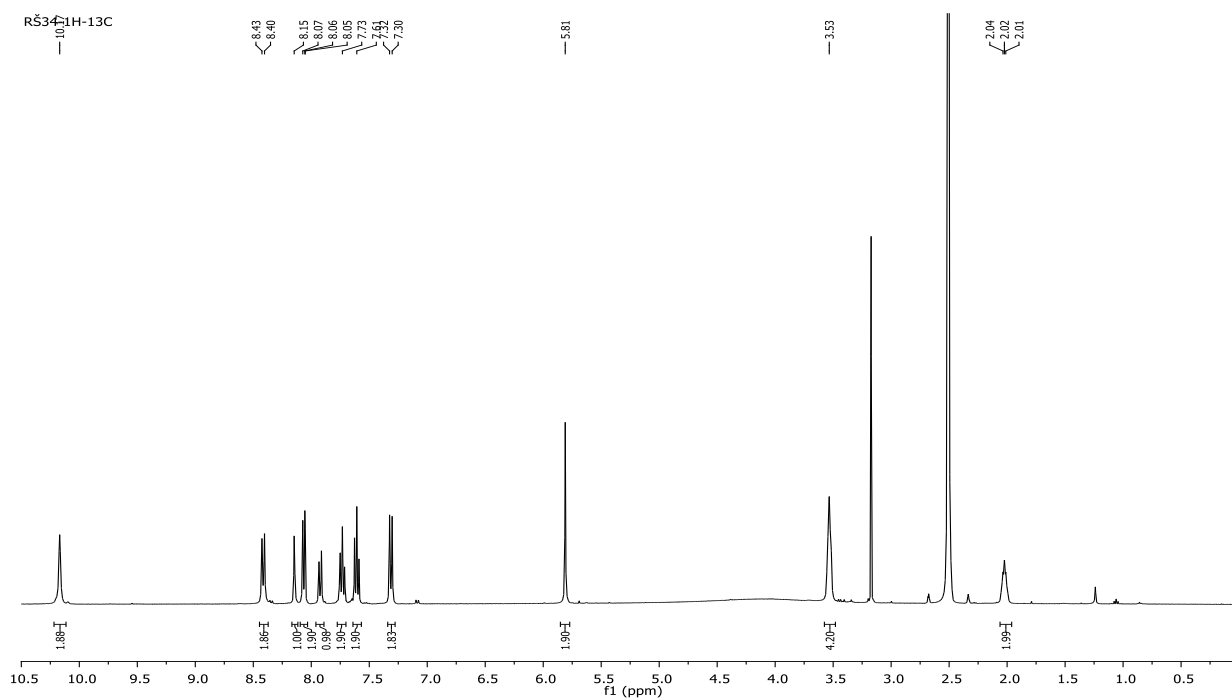

$^1\text{H}$  NMR (400 MHz, DMSO)  $\delta$  spectrum of 2-(4-(2-Oxo-2-phenylethoxy)phenyl)-5(6)-(3,4,5,6-tetrahydropyrimidin-2-yl)-1H-benzimidazole hydrochloride (**15a**)

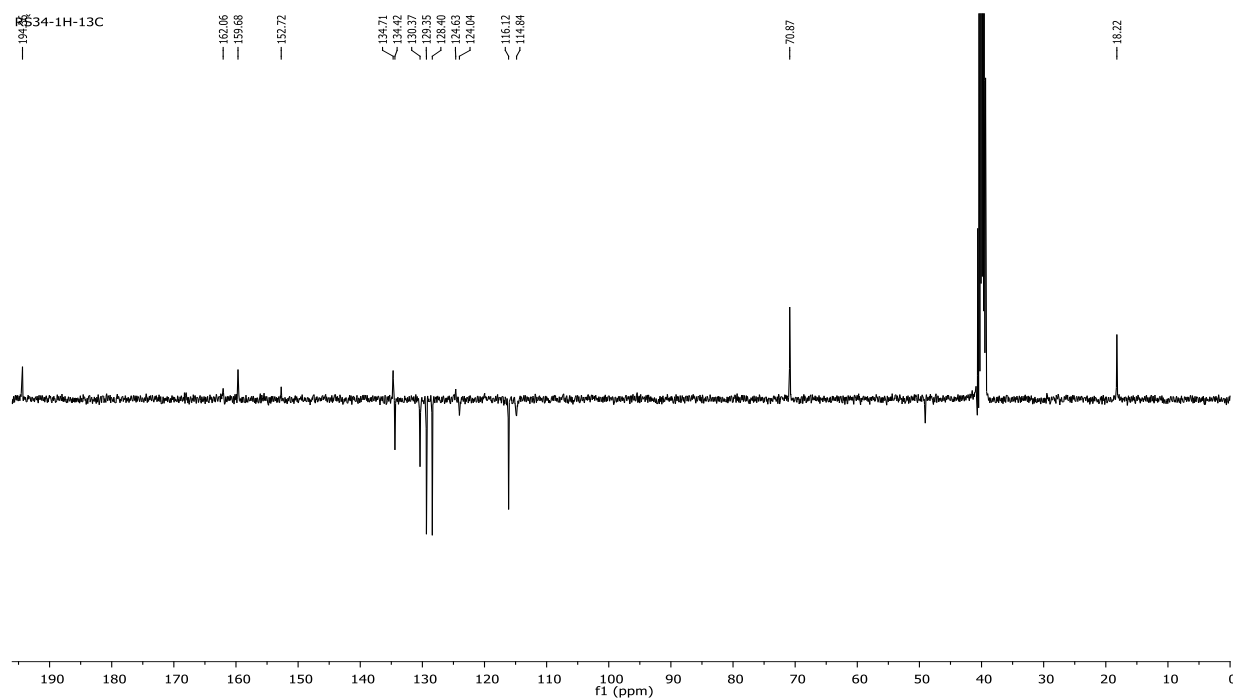

$^{13}\text{C}$  NMR (101 MHz, DMSO)  $\delta$  spectrum of 2-(4-(2-Oxo-2-phenylethoxy)phenyl)-5(6)-(3,4,5,6-tetrahydropyrimidin-2-yl)-1H-benzimidazole hydrochloride (**15a**)



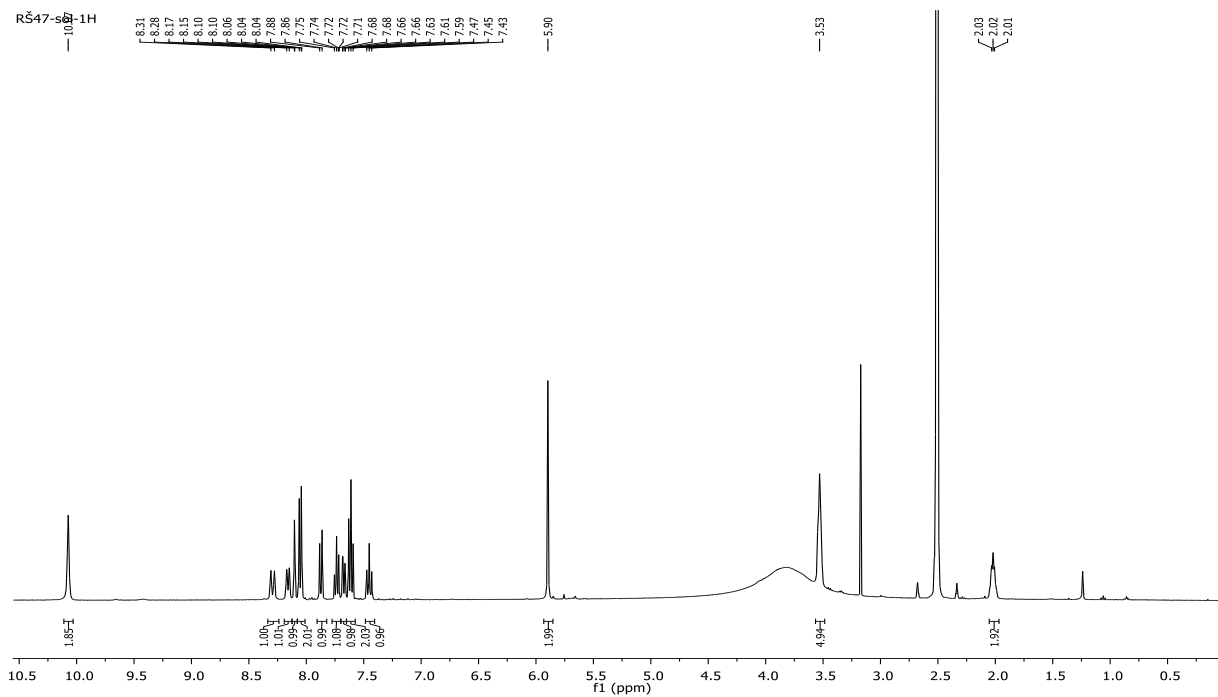

$^1\text{H}$  NMR (400 MHz, DMSO)  $\delta$  spectrum of 2-(3-Fluoro-4-(2-oxo-2-phenylethoxy)phenyl)-5(6)-(3,4,5,6-tetrahydropyrimidin-2-yl)-1H- benzimidazole hydrochloride (**15b**)

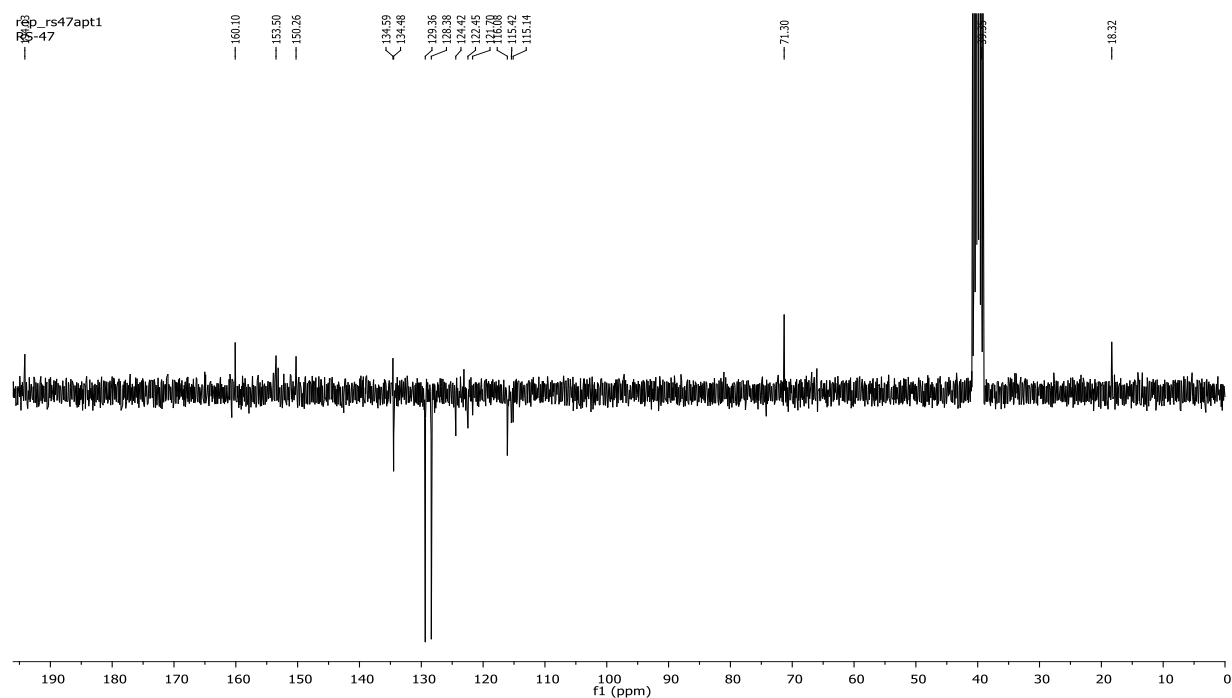

$^{13}\text{C}$  NMR (75 MHz, DMSO)  $\delta$  spectrum of 2-(3-Fluoro-4-(2-oxo-2-phenylethoxy)phenyl)-5(6)-(3,4,5,6-tetrahydropyrimidin-2-yl)-1H- benzimidazole hydrochloride (**15b**)

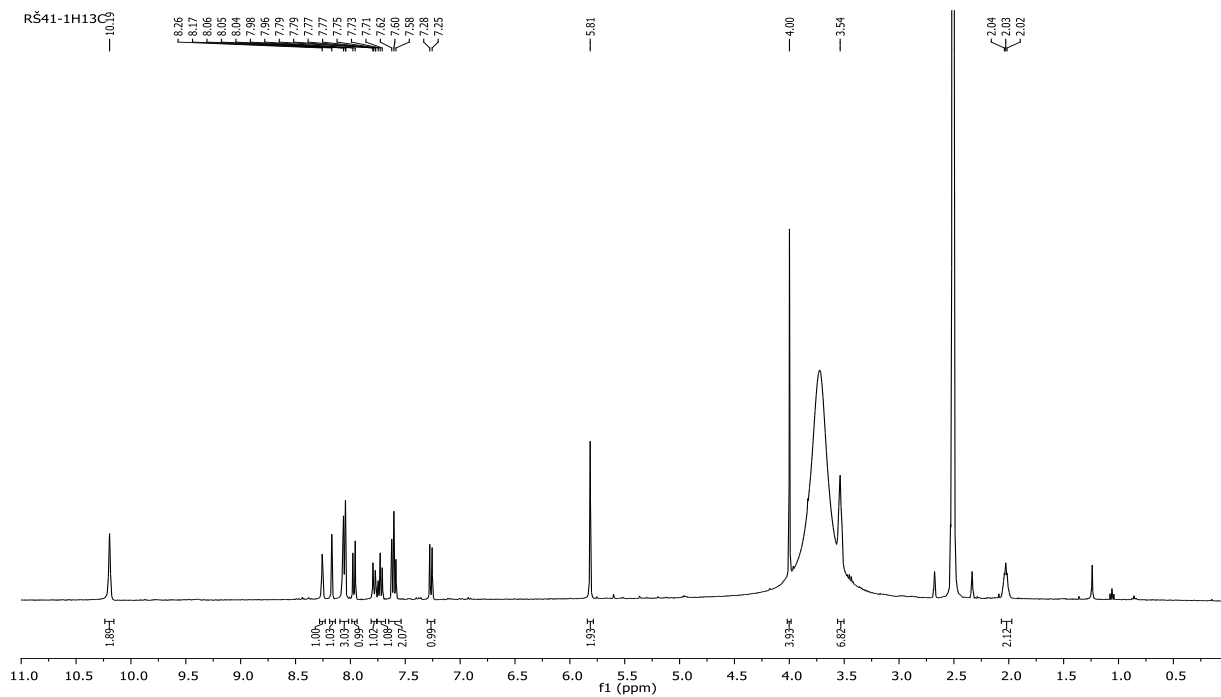

$^1\text{H}$  NMR (400 MHz, DMSO)  $\delta$  spectrum of 2-(3-Methoxy-4-(2-oxo-2-phenylethoxy)phenyl)-5(6)-(3,4,5,6-tetrahydropyrimidin-2-yl)-1H-benzimidazole hydrochloride (**15c**)

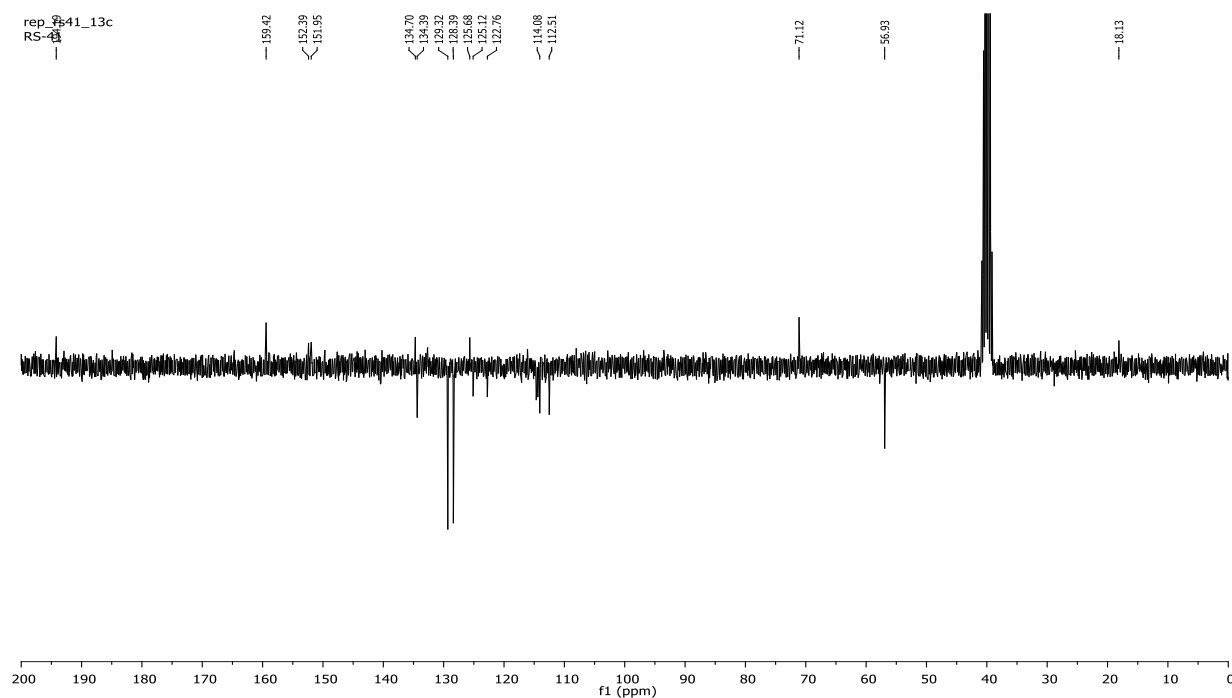

$^{13}\text{C}$  NMR (75 MHz, DMSO)  $\delta$  spectrum of 2-(3-Methoxy-4-(2-oxo-2-phenylethoxy)phenyl)-5(6)-(3,4,5,6-tetrahydropyrimidin-2-yl)-1H-benzimidazole hydrochloride (**15c**)

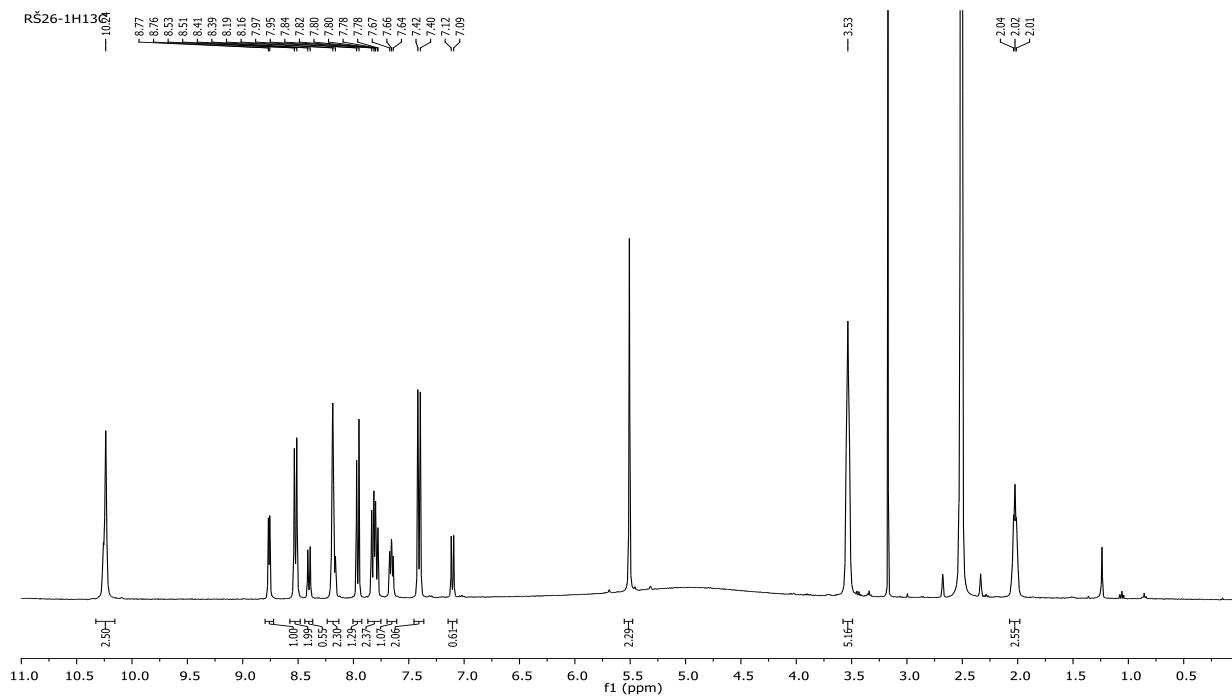

$^1\text{H}$  NMR (400 MHz, DMSO)  $\delta$  spectrum of 2-(4-(Pyridin-2-ylmethoxy)phenyl)-5(6)-(3,4,5,6-tetrahydropyrimidin-2-yl)-1H-benzimidazole hydrochloride (**16a**)

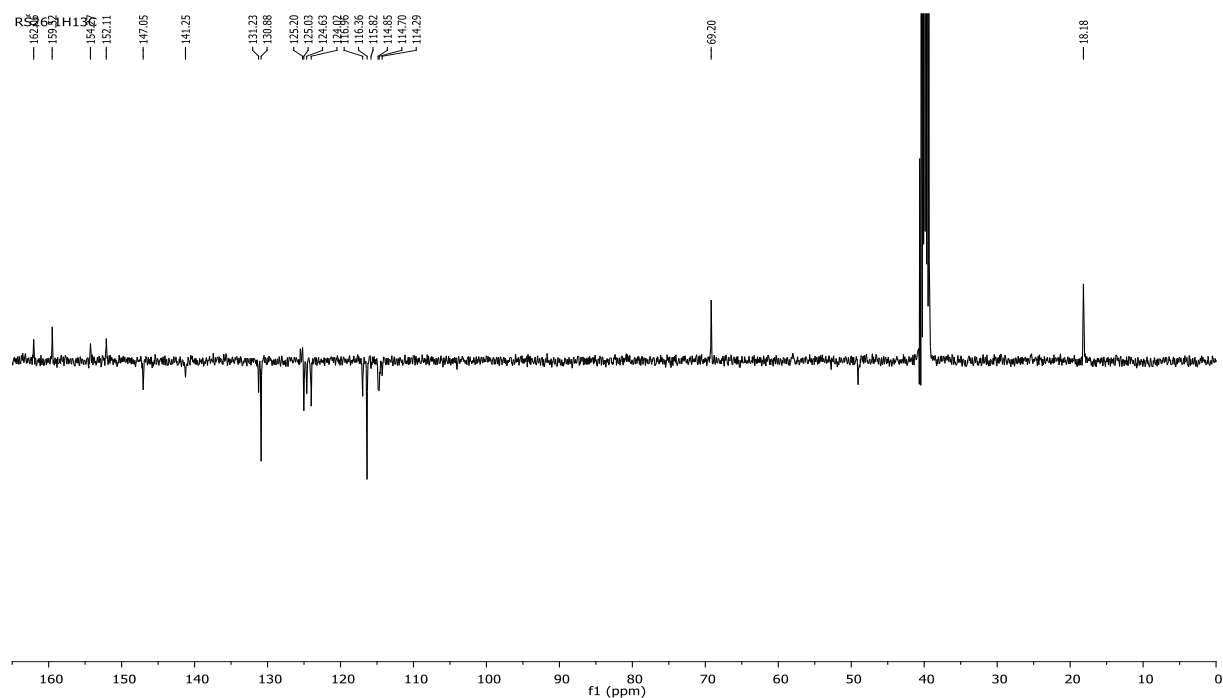

$^{13}\text{C}$  NMR (101 MHz, DMSO)  $\delta$  spectrum of 2-(4-(Pyridin-2-ylmethoxy)phenyl)-5(6)-(3,4,5,6-tetrahydropyrimidin-2-yl)-1H-benzimidazole hydrochloride (**16a**)

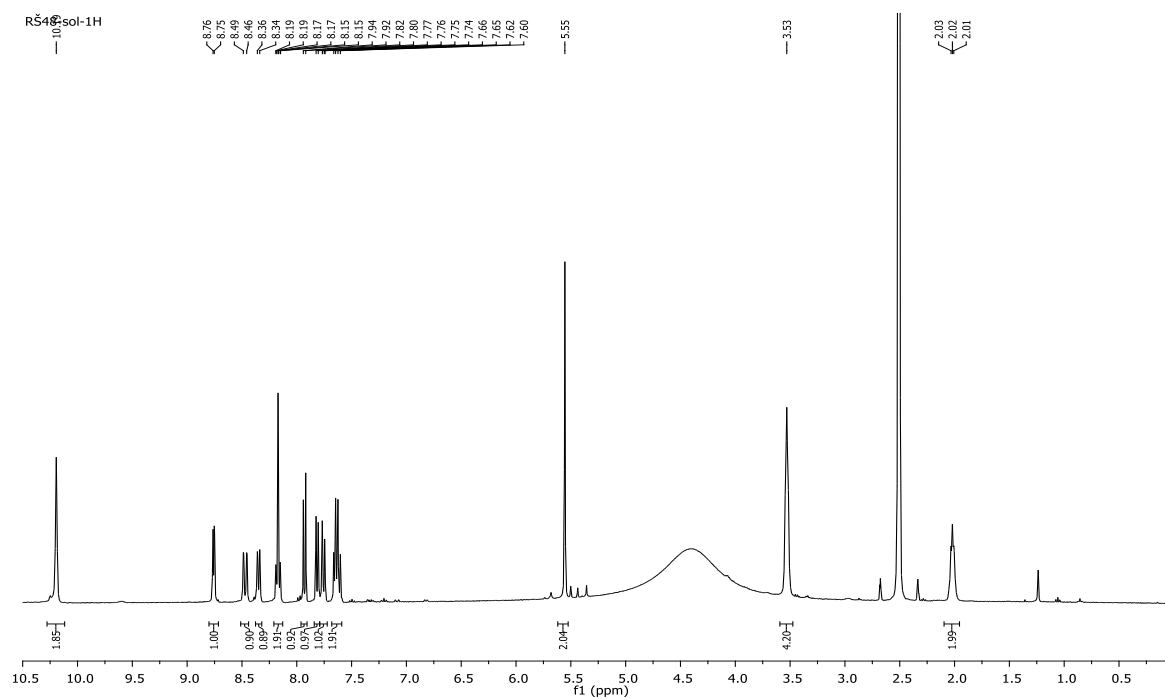

$^1\text{H}$  NMR (400 MHz, DMSO)  $\delta$  spectrum of 2-(3-Fluoro-4-(pyridin-2-ylmethoxy)phenyl)-5(6)-(3,4,5,6-tetrahydropyrimidin-2-yl)-1H-benzimidazole hydrochloride (**16b**)

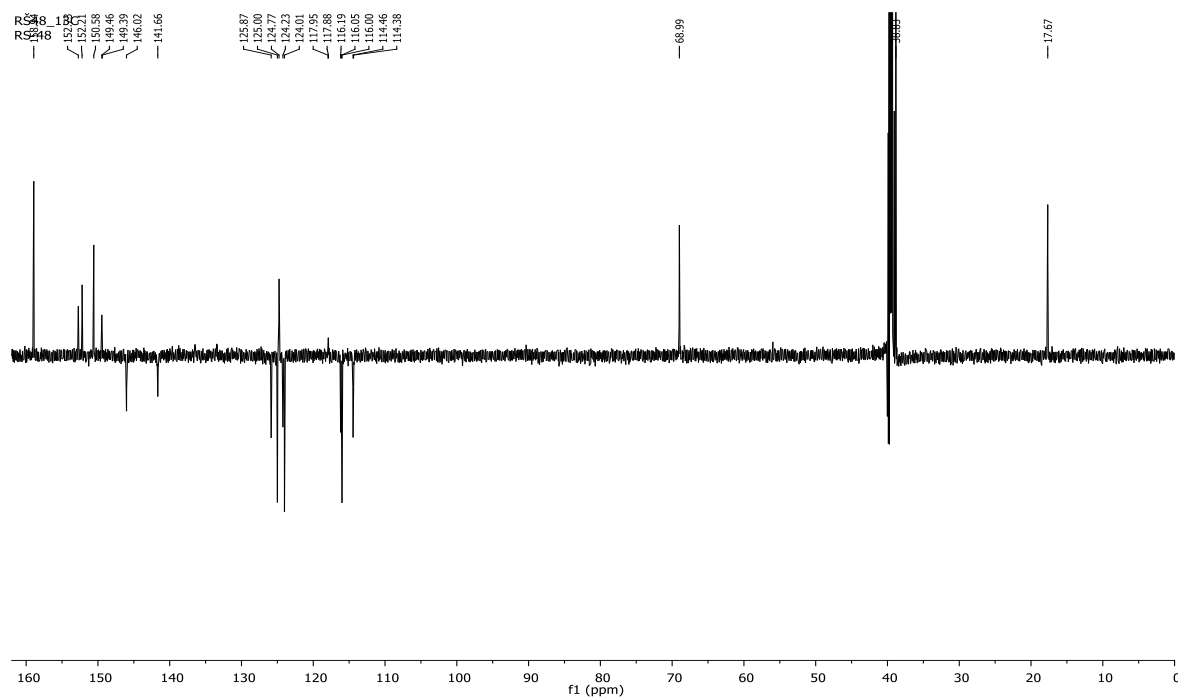

$^{13}\text{C}$  NMR (151 MHz, DMSO)  $\delta$  spectrum of 2-(3-Fluoro-4-(pyridin-2-ylmethoxy)phenyl)-5(6)-(3,4,5,6-tetrahydropyrimidin-2-yl)-1H-benzimidazole hydrochloride (**16b**)

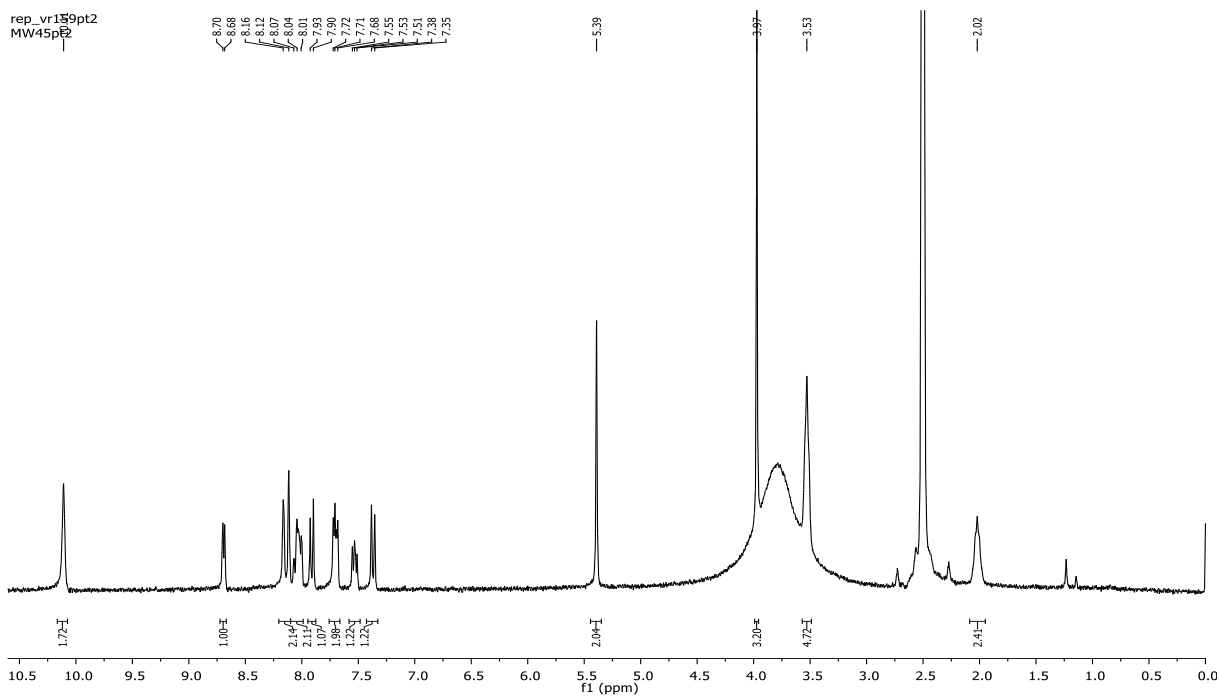

$^1\text{H}$  NMR (300 MHz, DMSO)  $\delta$  spectrum of 2-(3-Methoxy-4-(pyridin-2-ylmethoxy)phenyl)-5(6)-(3,4,5,6-tetrahydropyrimidin-2-yl)-1H-benzimidazole hydrochloride (**16c**)

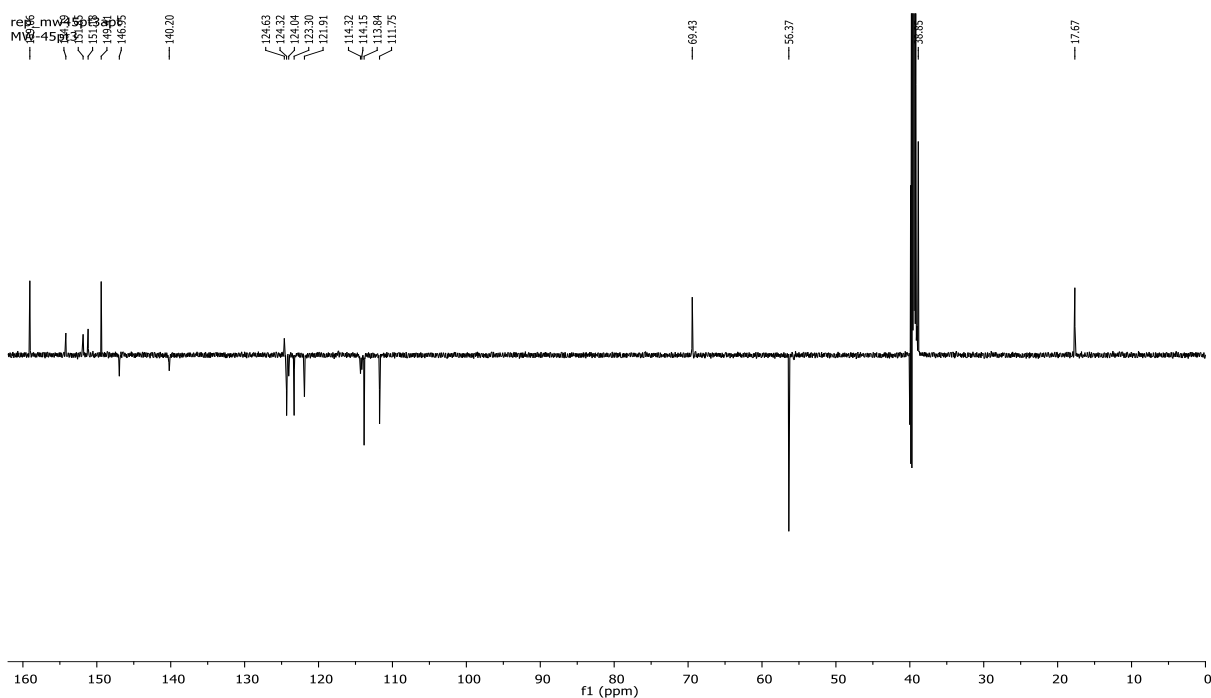

$^{13}\text{C}$  NMR (151 MHz, DMSO)  $\delta$  spectrum of 2-(3-Methoxy-4-(pyridin-2-ylmethoxy)phenyl)-5(6)-(3,4,5,6-tetrahydropyrimidin-2-yl)-1H-benzimidazole hydrochloride (**16c**)

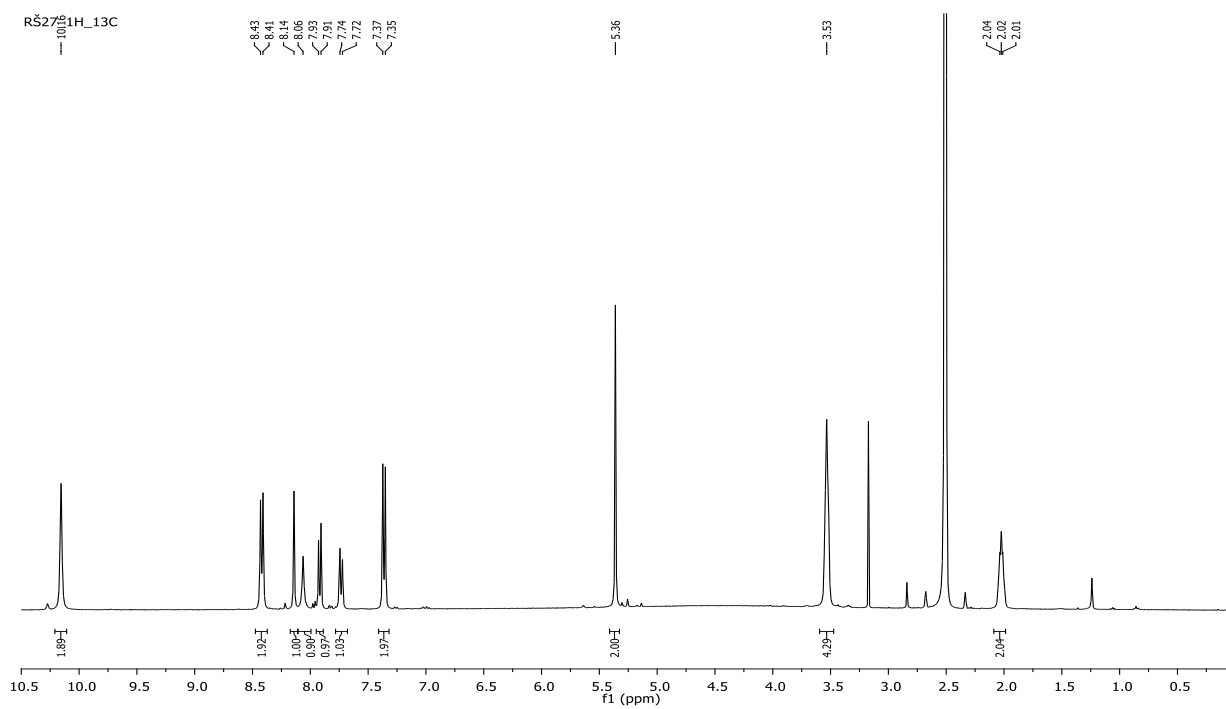

$^1\text{H}$  NMR (400 MHz, DMSO)  $\delta$  spectrum of 2-(4-((1H-1,2,3-triazol-4-yl)methoxy)phenyl)-5(6)-(3,4,5,6-tetrahydropyrimidin-2-yl)-1H-benzimidazole hydrochloride (**17a**)

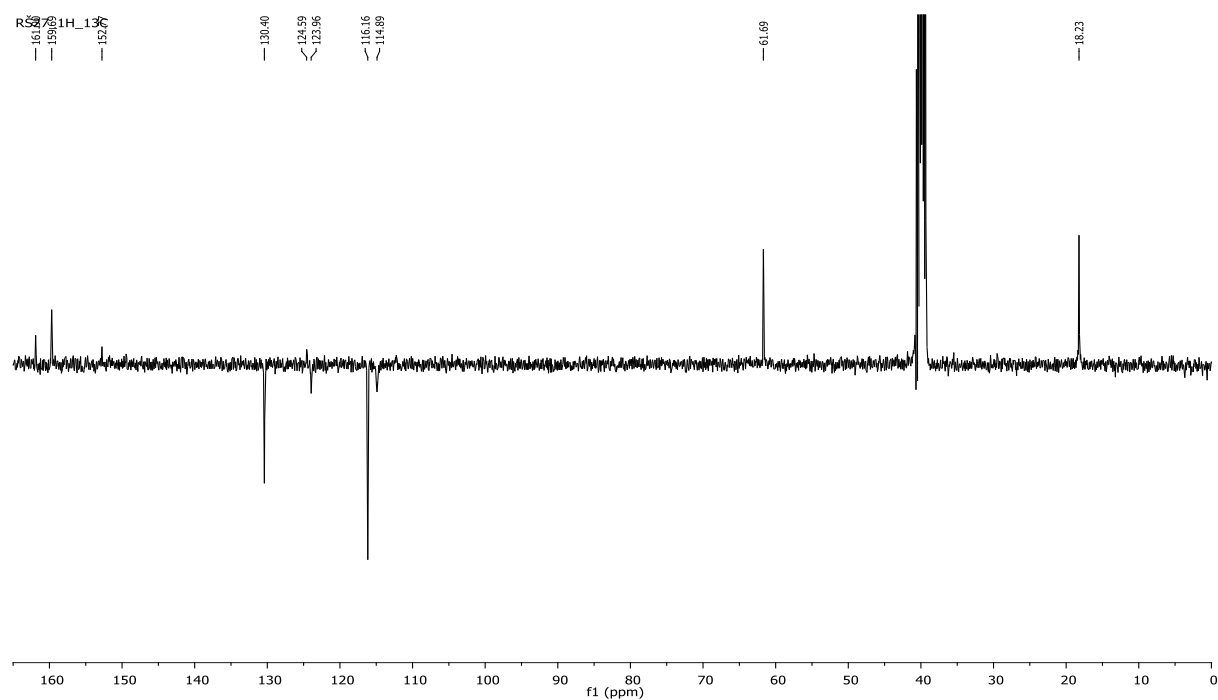

$^{13}\text{C}$  NMR (101 MHz, DMSO)  $\delta$  spectrum of 2-(4-((1H-1,2,3-triazol-4-yl)methoxy)phenyl)-5(6)-(3,4,5,6-tetrahydropyrimidin-2-yl)-1H-benzimidazole hydrochloride (**17a**)

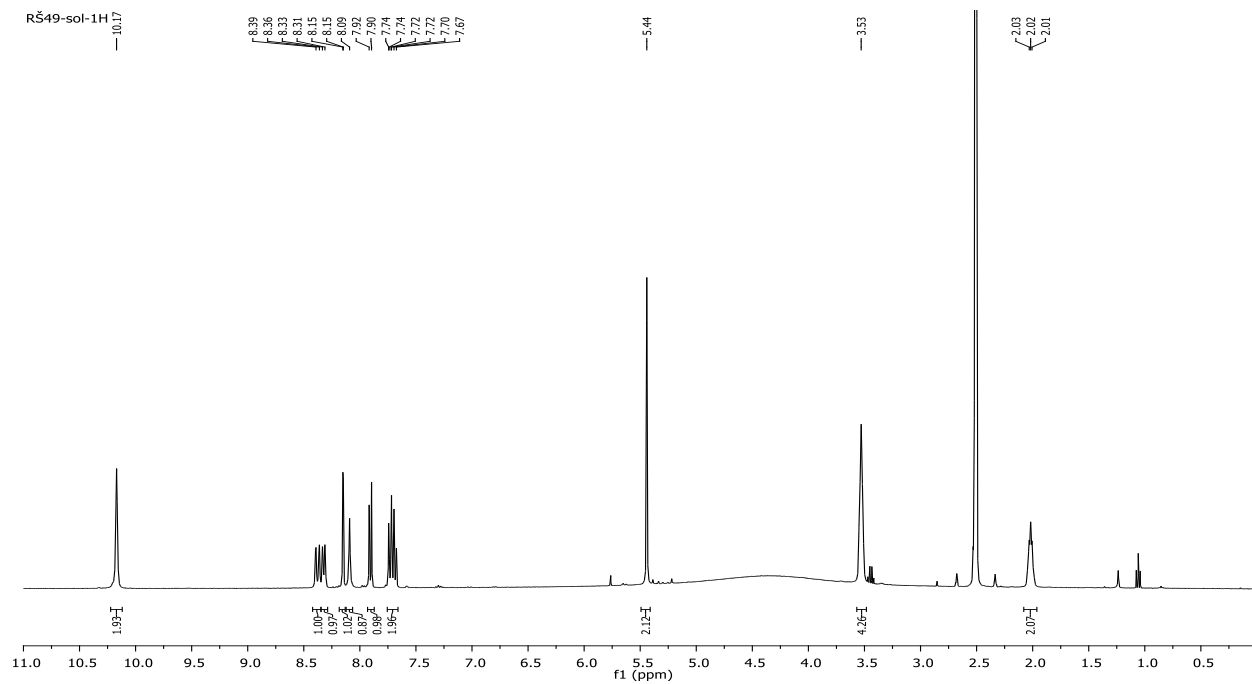

$^1\text{H}$  NMR (400 MHz, DMSO)  $\delta$  spectrum of 2-(4-((1H-1,2,3-triazol-4-yl)methoxy)-3-fluorophenyl)-5(6)-(3,4,5,6-tetrahydropyrimidin-2-yl)-1H-benzimidazole hydrochloride (**17b**)

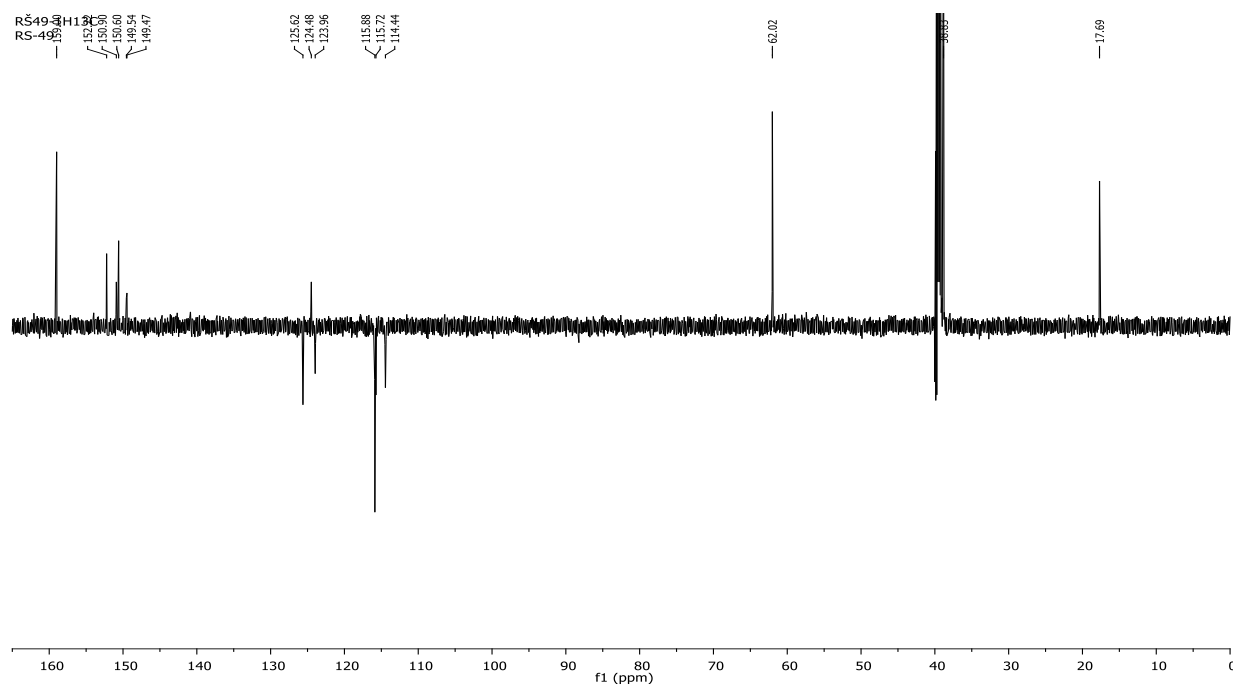

$^{13}\text{C}$  NMR (151 MHz, DMSO)  $\delta$  spectrum of 2-(4-((1H-1,2,3-triazol-4-yl)methoxy)-3-fluorophenyl)-5(6)-(3,4,5,6-tetrahydropyrimidin-2-yl)-1H-benzimidazole hydrochloride (**17b**)

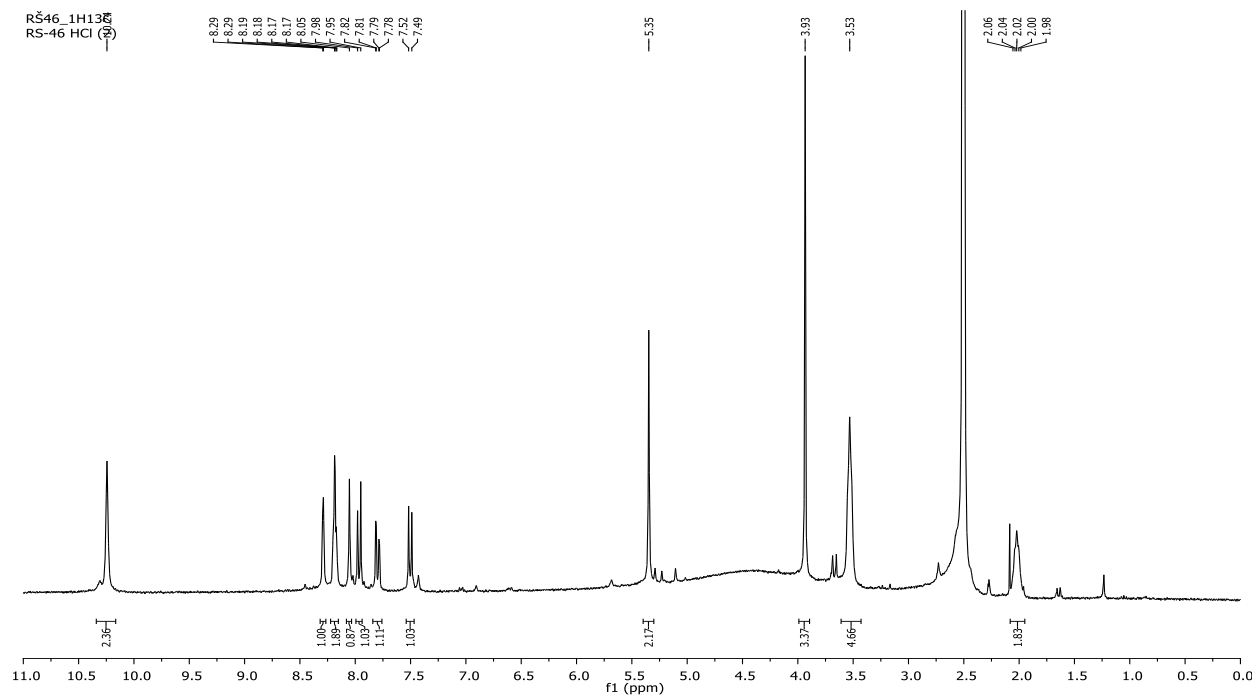

$^1\text{H}$  NMR (300 MHz, DMSO)  $\delta$  spectrum of 2-(4-((1H-1,2,3-triazol-4-yl)methoxy)-3-methoxyphenyl)-5(6)-(3,4,5,6-tetrahydropyrimidin-2-yl)-1H-benzimidazole hydrochloride (**17c**)

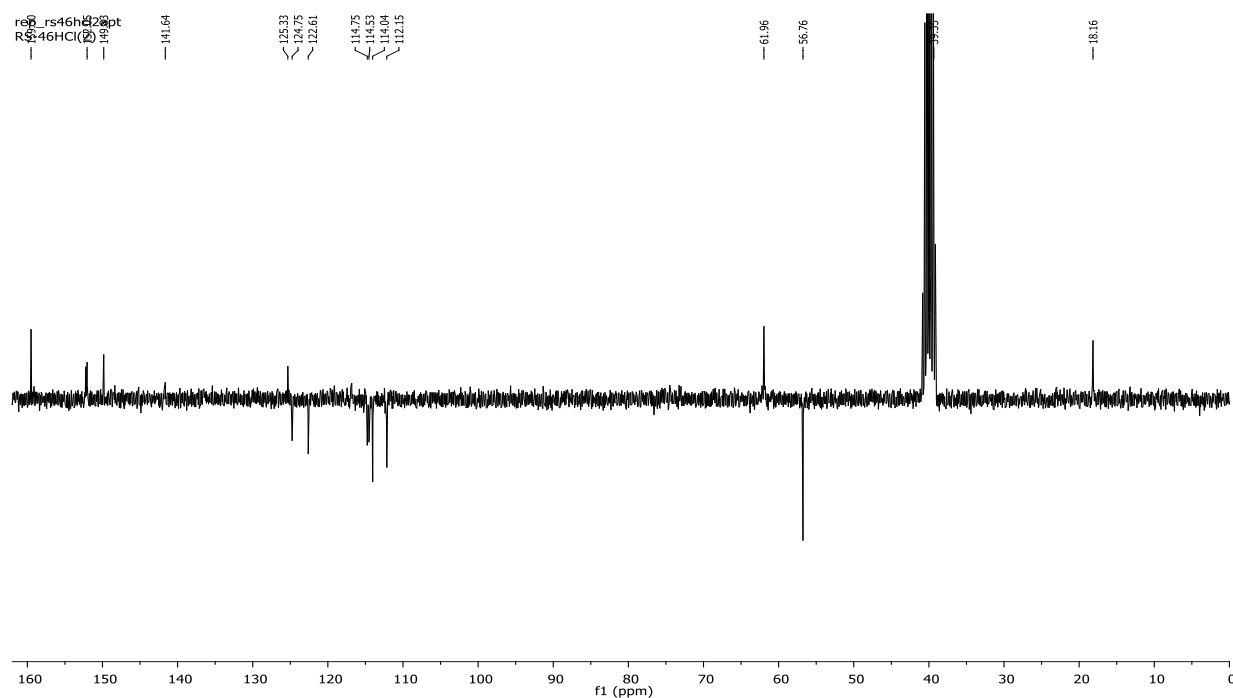

$^{13}\text{C}$  NMR (75 MHz, DMSO)  $\delta$  spectrum of 2-(4-((1H-1,2,3-triazol-4-yl)methoxy)-3-methoxyphenyl)-5(6)-(3,4,5,6-tetrahydropyrimidin-2-yl)-1H-benzimidazole hydrochloride (**17c**)



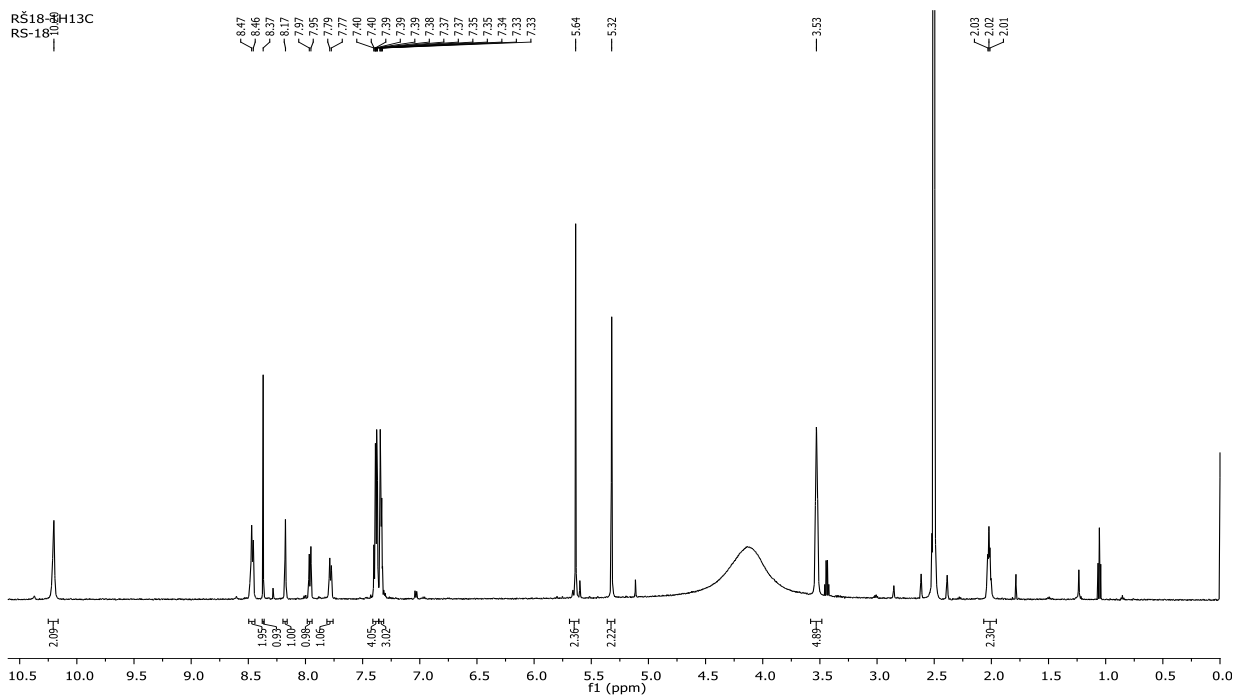

<sup>1</sup>H NMR (600 MHz, DMSO)  $\delta$  spectrum of 2-(4-((1-Benzyl-1H-1,2,3-triazol-4-yl)methoxy)phenyl)-5(6)-(3,4,5,6-tetrahydropyrimidin-2-yl)-1H-benzimidazole hydrochloride (**18a**)

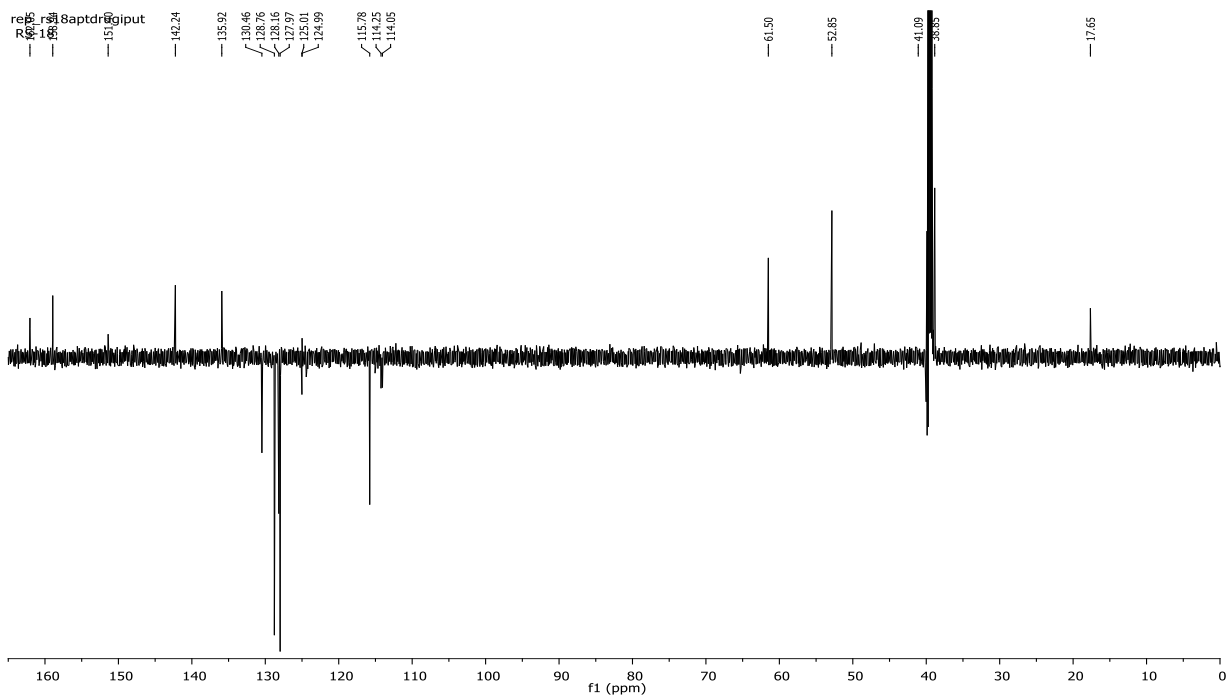

<sup>13</sup>C NMR (151 MHz, DMSO)  $\delta$  spectrum of 2-(4-((1-Benzyl-1H-1,2,3-triazol-4-yl)methoxy)phenyl)-5(6)-(3,4,5,6-tetrahydropyrimidin-2-yl)-1H-benzimidazole hydrochloride (**18a**)

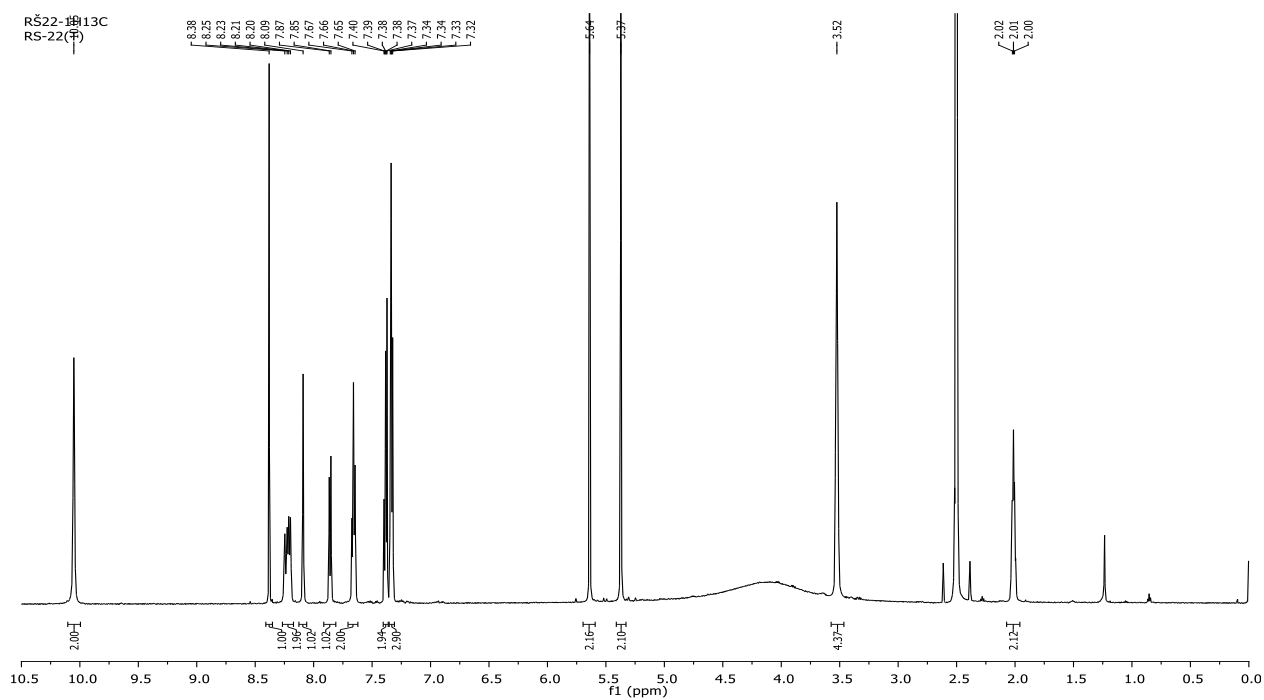

$^1\text{H}$  NMR (600 MHz, DMSO)  $\delta$  spectrum of 2-(4-((1-Benzyl-1H-1,2,3-triazol-4-yl)methoxy)-3-fluorophenyl)-5(6)-(3,4,5,6-tetrahydropyrimidin-2-yl)-1H-benzimidazole hydrochloride (**18b**)

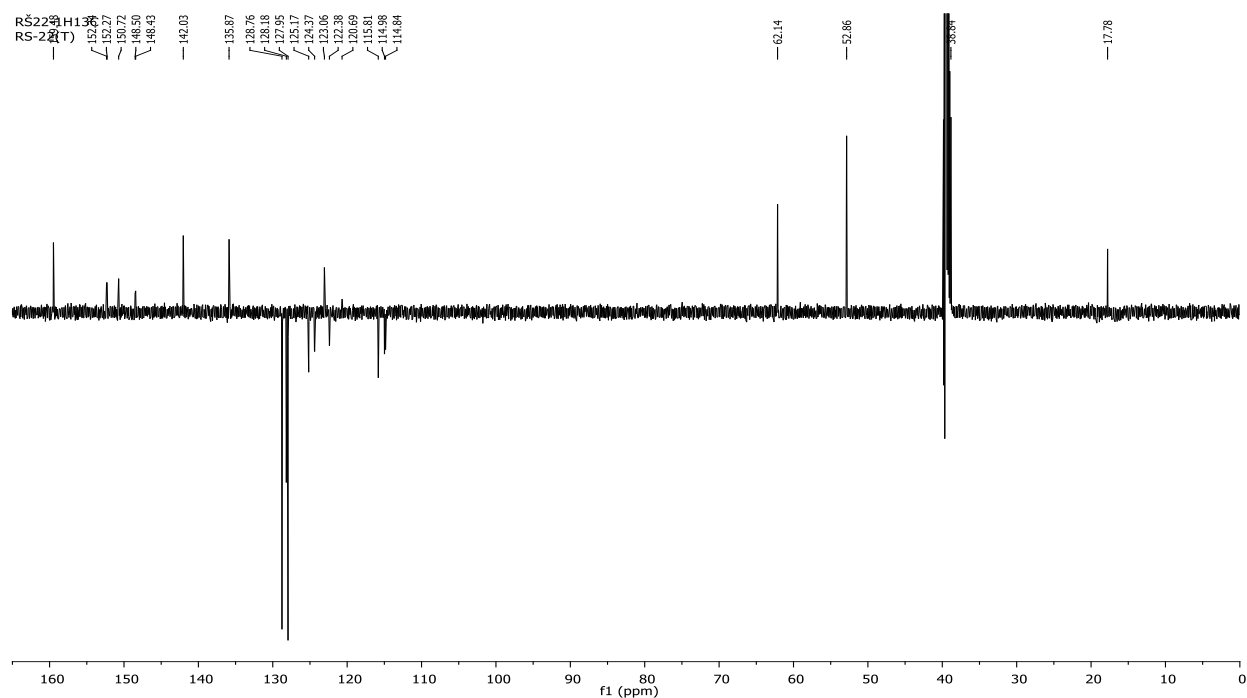

$^{13}\text{C}$  NMR (151 MHz, DMSO)  $\delta$  spectrum of 2-(4-((1-Benzyl-1H-1,2,3-triazol-4-yl)methoxy)-3-fluorophenyl)-5(6)-(3,4,5,6-tetrahydropyrimidin-2-yl)-1H-benzimidazole hydrochloride (**18b**)

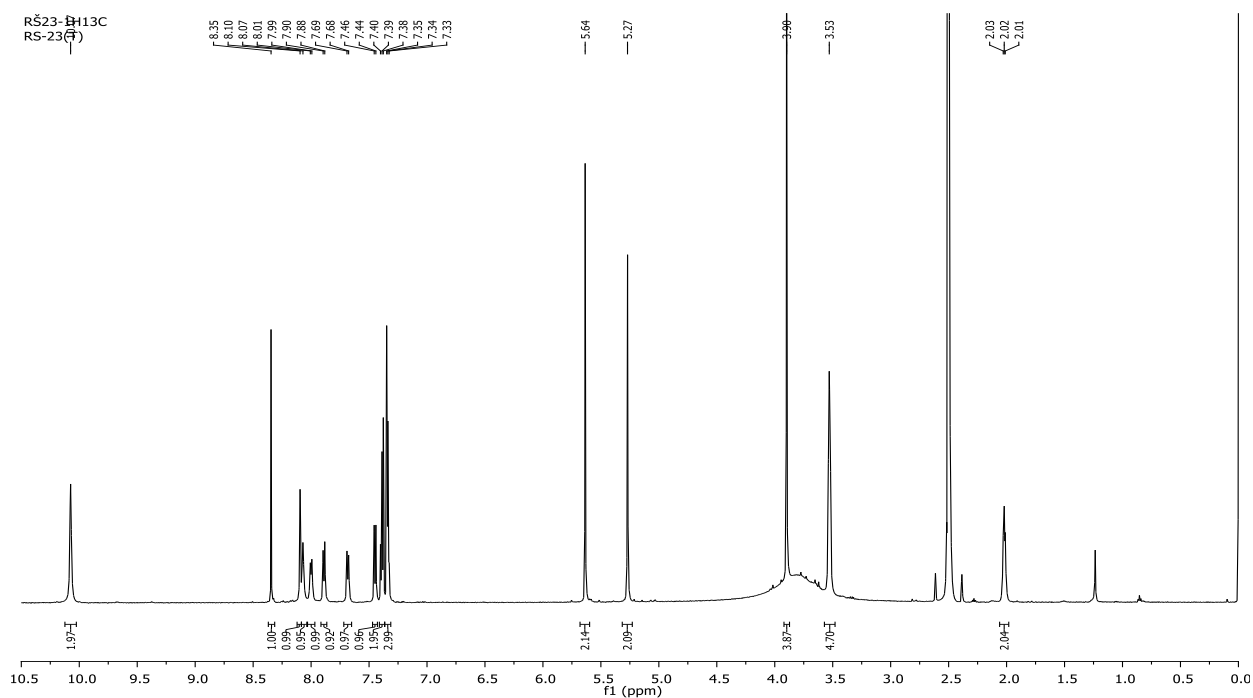

$^1\text{H}$  NMR (600 MHz, DMSO)  $\delta$  spectrum of 2-(4-((1-Benzyl-1H-1,2,3-triazol-4-yl)methoxy)-3-methoxyphenyl)-5(6)-(3,4,5,6-tetrahydropyrimidin-2-yl)-1H-benzimidazole hydrochloride (**18c**)

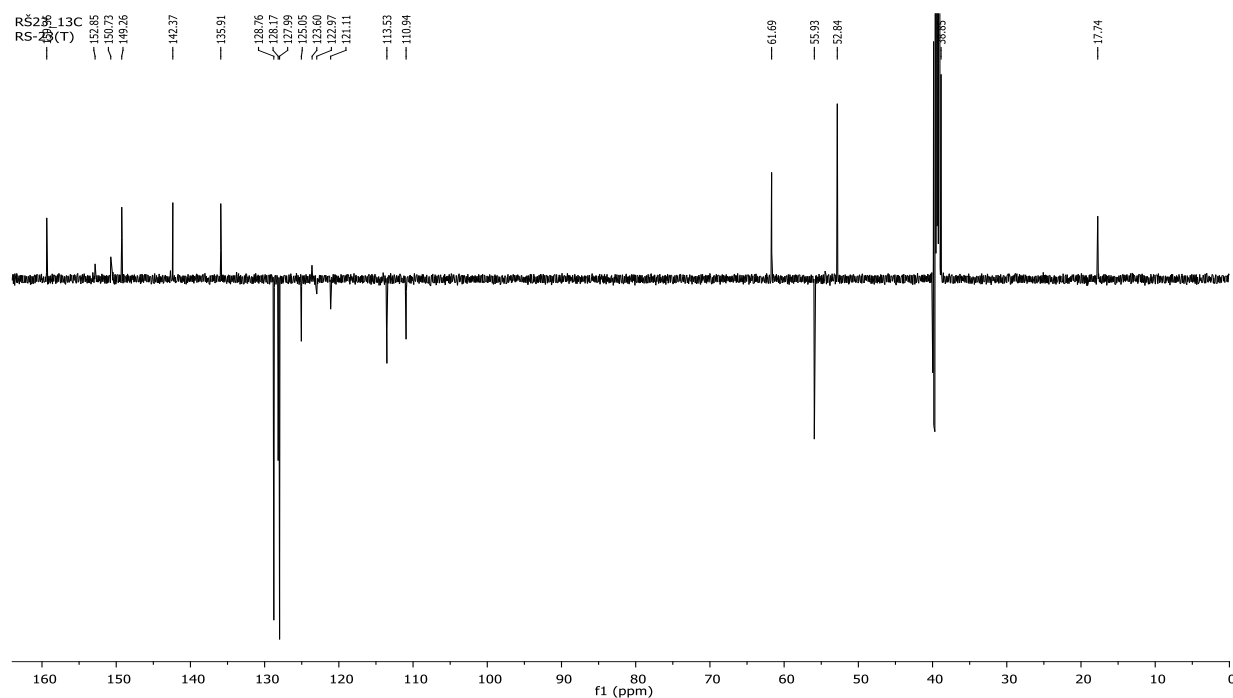

$^{13}\text{C}$  NMR (151 MHz, DMSO)  $\delta$  spectrum of 2-(4-((1-Benzyl-1H-1,2,3-triazol-4-yl)methoxy)-3-methoxyphenyl)-5(6)-(3,4,5,6-tetrahydropyrimidin-2-yl)-1H-benzimidazole hydrochloride (**18c**)

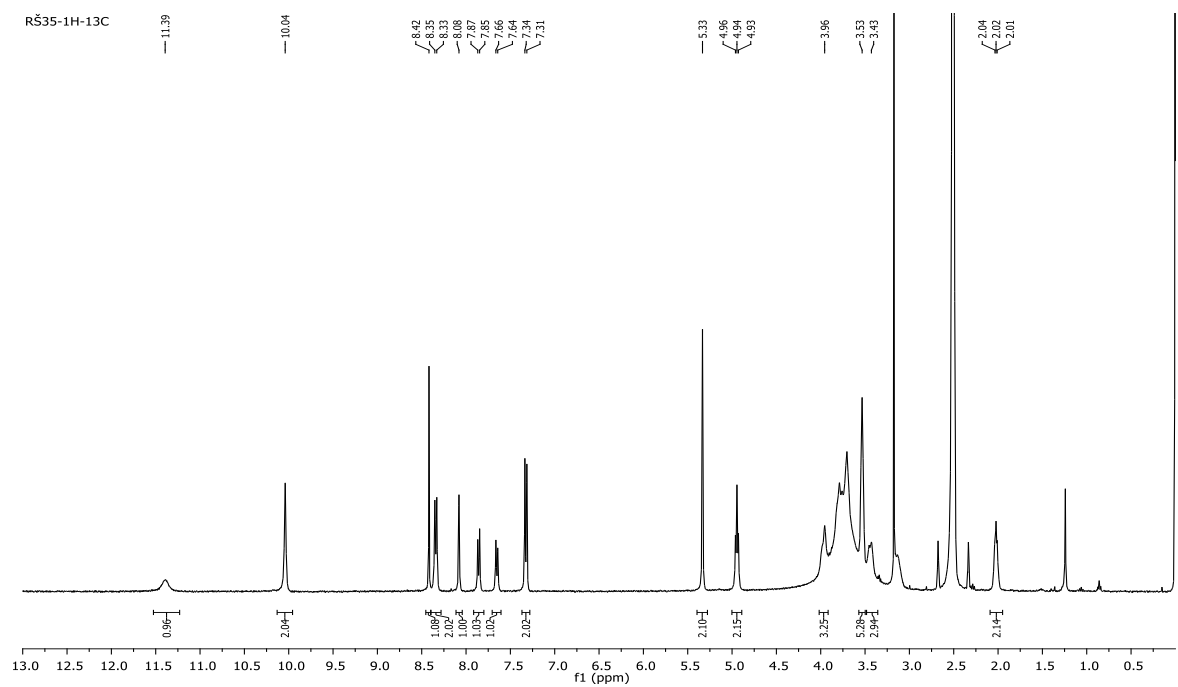

$^1\text{H}$  NMR (300 MHz, DMSO)  $\delta$  spectrum of 2-(4-((1-(2-Morpholinoethyl)-1H-1,2,3-triazol-4-yl)methoxy)phenyl)-5(6)-(3,4,5,6-tetrahydropyrimidin-2-yl)-1H-benzimidazole dihydrochloride (**19a**)

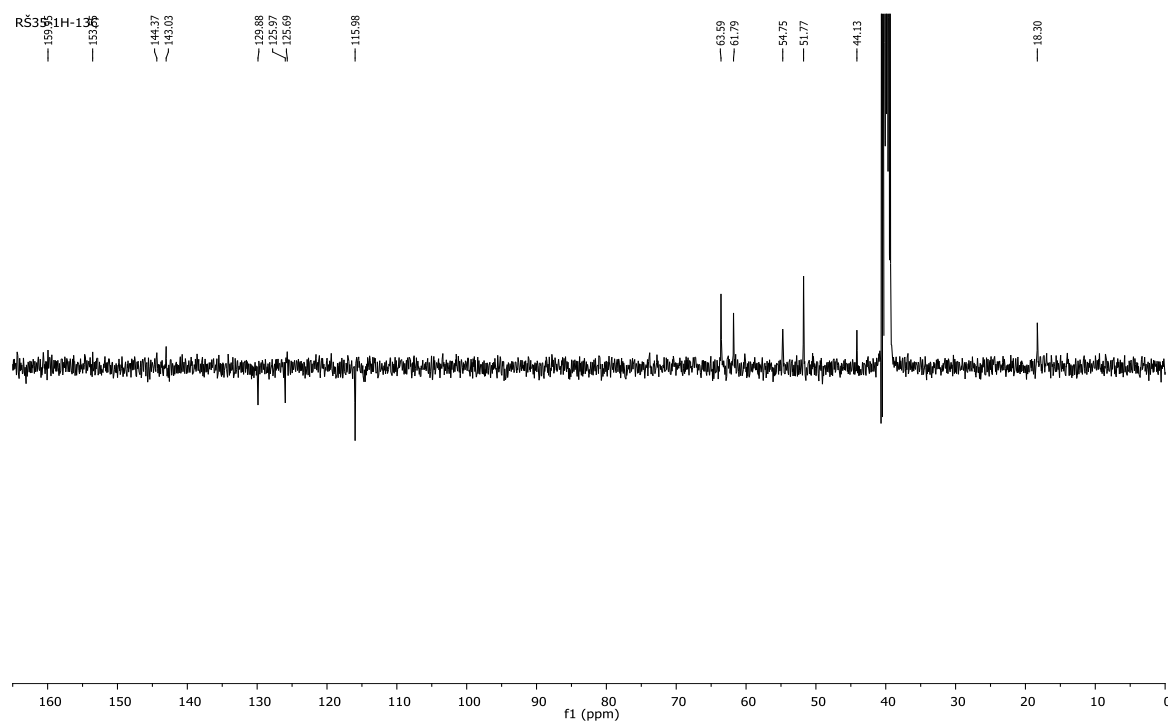

$^{13}\text{C}$  NMR (101 MHz, DMSO)  $\delta$  spectrum of 2-(4-((1-(2-Morpholinoethyl)-1H-1,2,3-triazol-4-yl)methoxy)phenyl)-5(6)-(3,4,5,6-tetrahydropyrimidin-2-yl)-1H-benzimidazole dihydrochloride (**19a**)

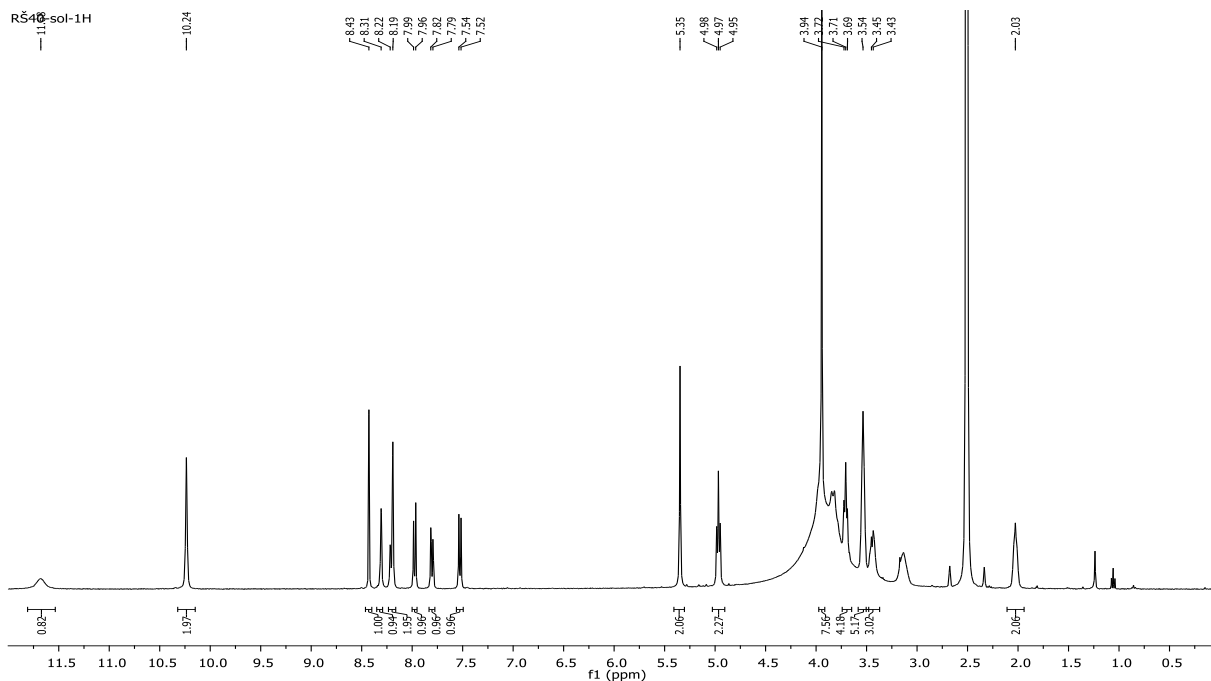

<sup>1</sup>H NMR (400 MHz, DMSO) δ spectrum of 2-(4-((1-(2-Morpholinoethyl)-1H-1,2,3-triazol-4-yl)methoxy)-3-methoxyphenyl)-5(6)-(3,4,5,6-tetrahydropyrimidin-2-yl)-1H-benzimidazole dihydrochloride (**19c**)

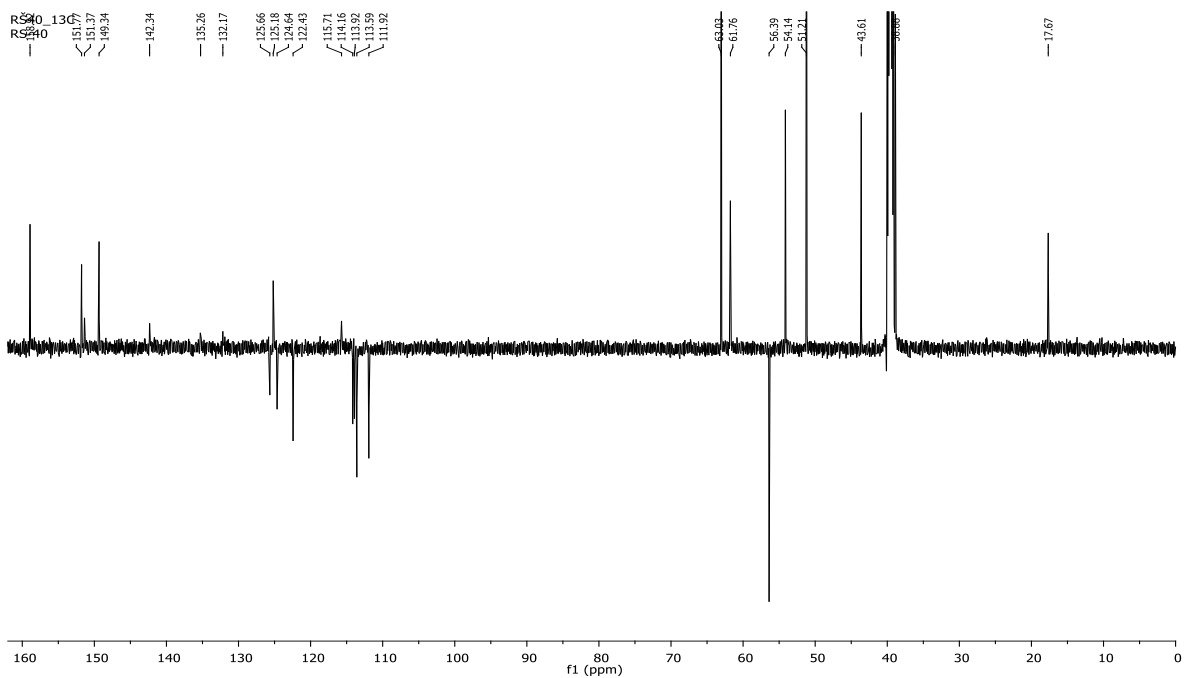

<sup>13</sup>C NMR (151 MHz, DMSO) δ spectrum of 2-(4-((1-(2-Morpholinoethyl)-1H-1,2,3-triazol-4-yl)methoxy)-3-methoxyphenyl)-5(6)-(3,4,5,6-tetrahydropyrimidin-2-yl)-1H-benzimidazole dihydrochloride (**19c**)

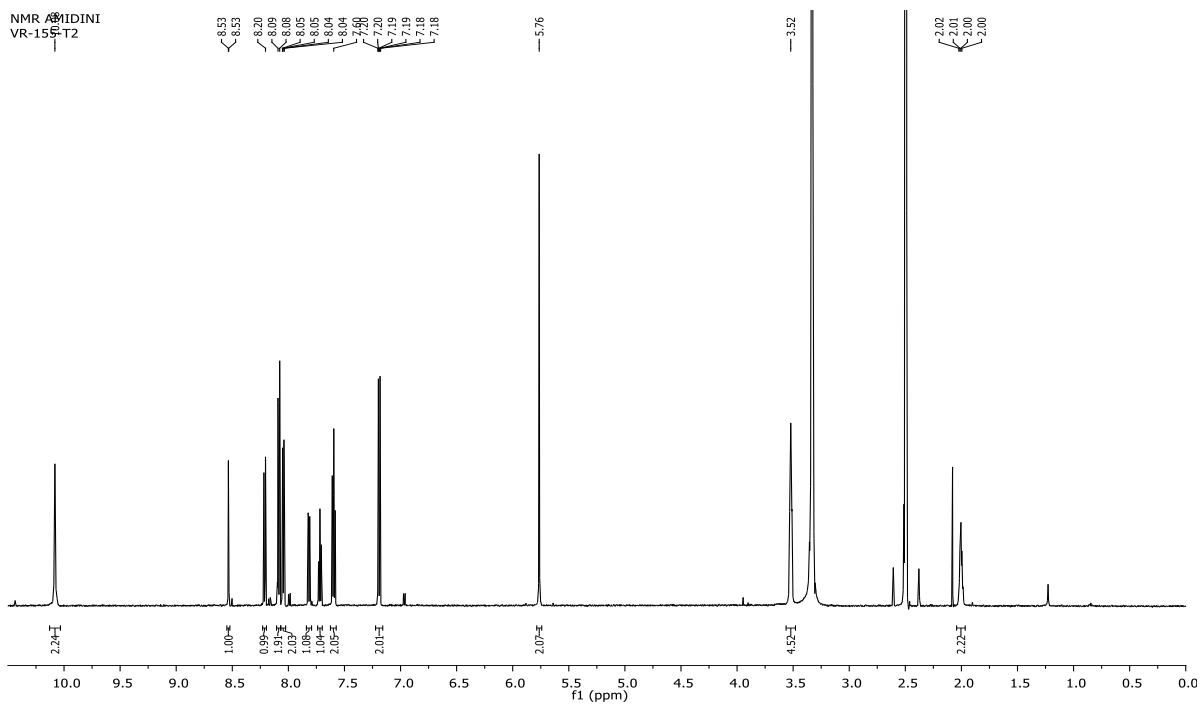

$^1\text{H}$  NMR (600 MHz, DMSO)  $\delta$  spectrum of 2-(4-(2-Oxo-2-phenylethoxy)phenyl)-6-(1,4,5,6-tetrahydropyrimidin-2-yl)benzothiazole hydrochloride (**21a**)

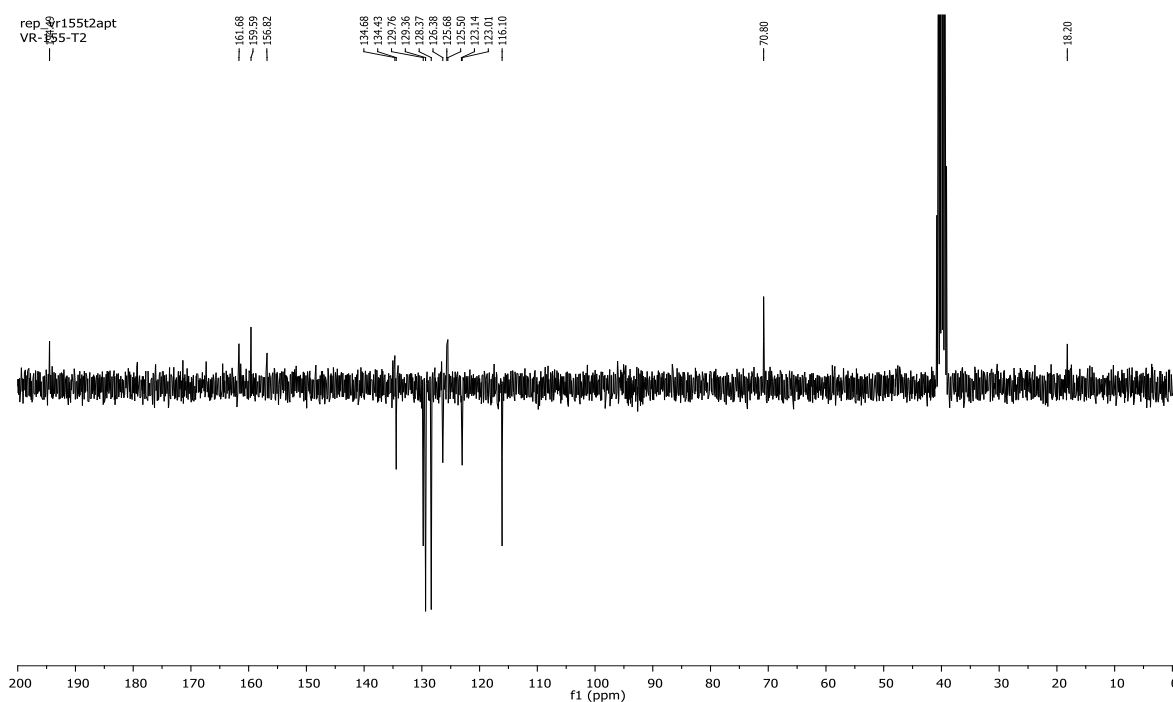

$^{13}\text{C}$  NMR (75 MHz, DMSO)  $\delta$  spectrum of 2-(4-(2-Oxo-2-phenylethoxy)phenyl)-6-(1,4,5,6-tetrahydropyrimidin-2-yl)benzothiazole hydrochloride (**21a**)

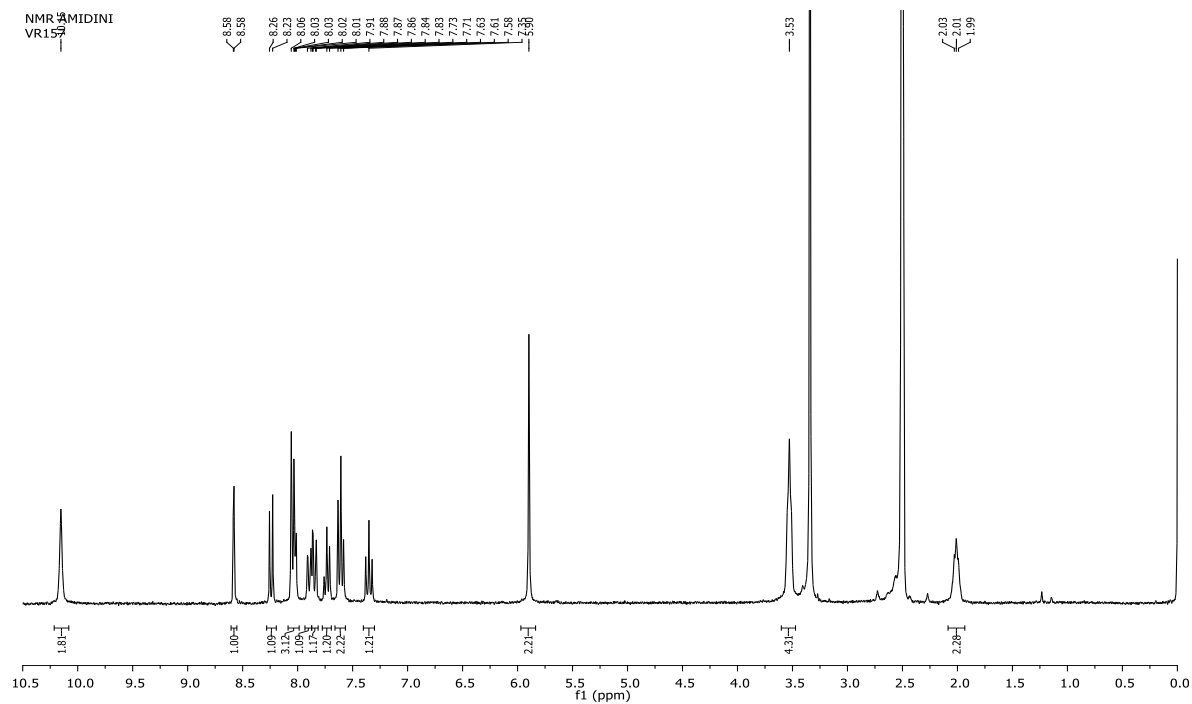

$^1\text{H}$  NMR (300 MHz, DMSO)  $\delta$  spectrum of 2-(3-Fluoro-4-(2-oxo-2-phenylethoxy)phenyl)-6-(1,4,5,6-tetrahydropyrimidin-2-yl)benzothiazole hydrochloride (**21b**)

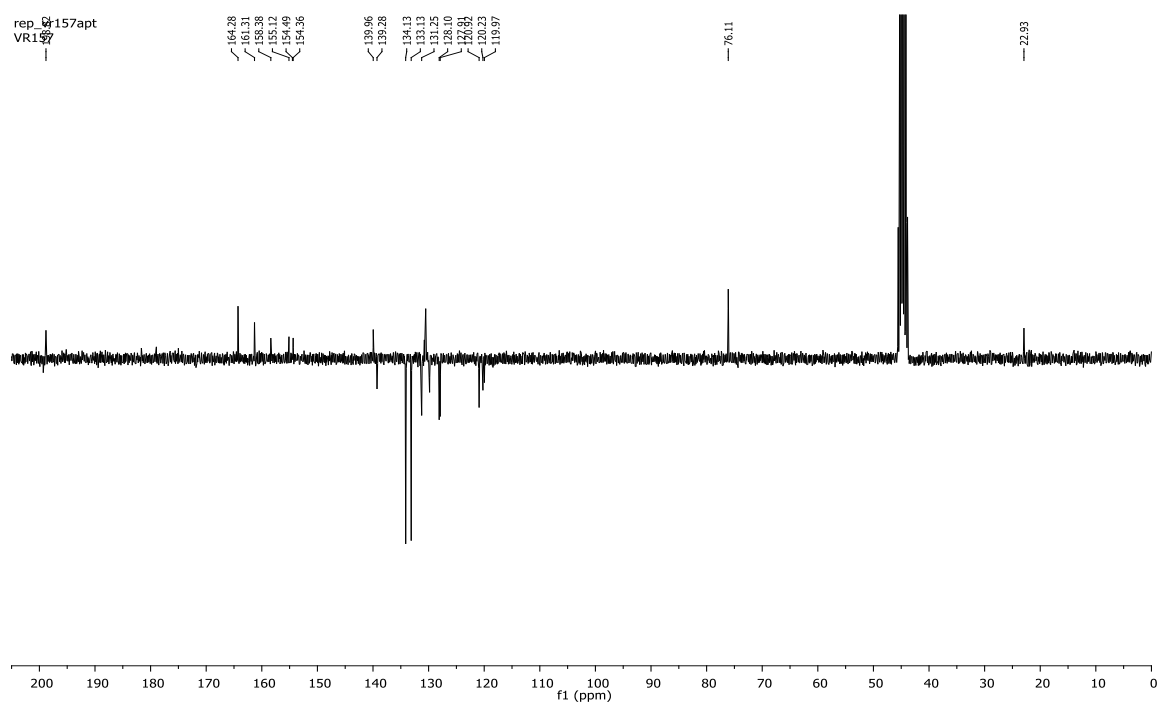

$^{13}\text{C}$  NMR (75 MHz, DMSO)  $\delta$  spectrum of 2-(3-Fluoro-4-(2-oxo-2-phenylethoxy)phenyl)-6-(1,4,5,6-tetrahydropyrimidin-2-yl)benzothiazole hydrochloride (**21b**)

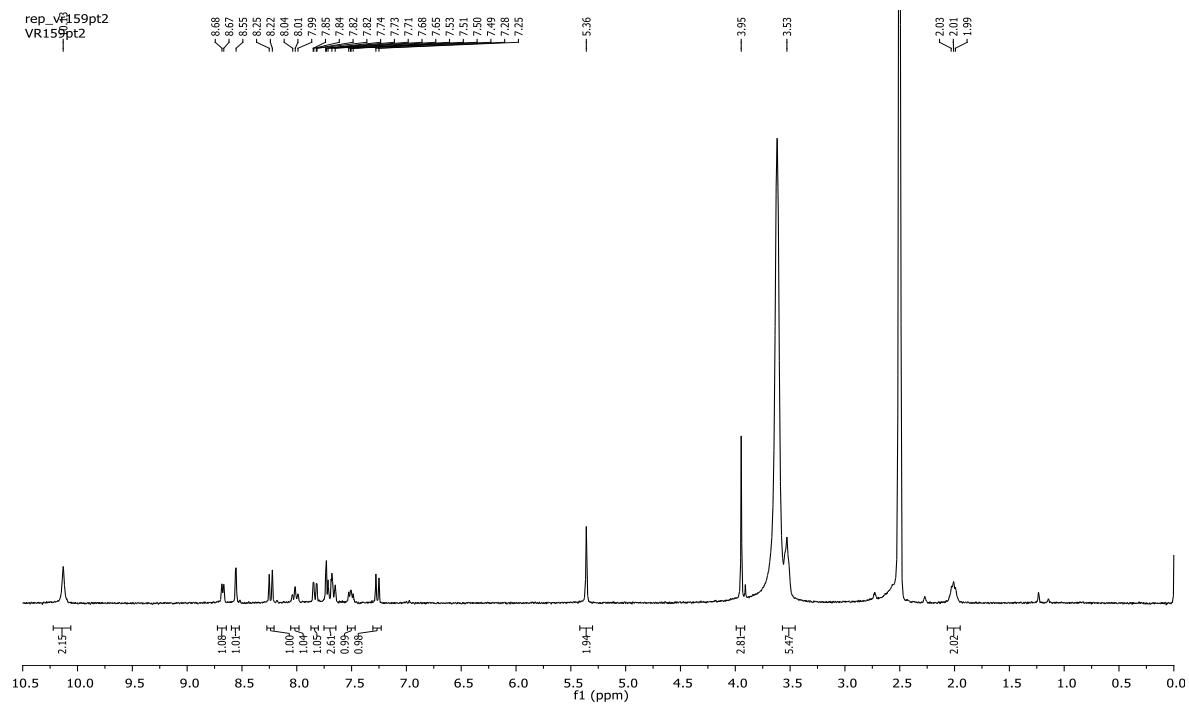

$^1\text{H}$  NMR (300 MHz, DMSO)  $\delta$  spectrum of 2-(3-Methoxy-4-(pyridin-2-ylmethoxy)phenyl)-6-(1,4,5,6-tetrahydropyrimidin-2-yl)benzothiazole hydrochloride (**22c**)

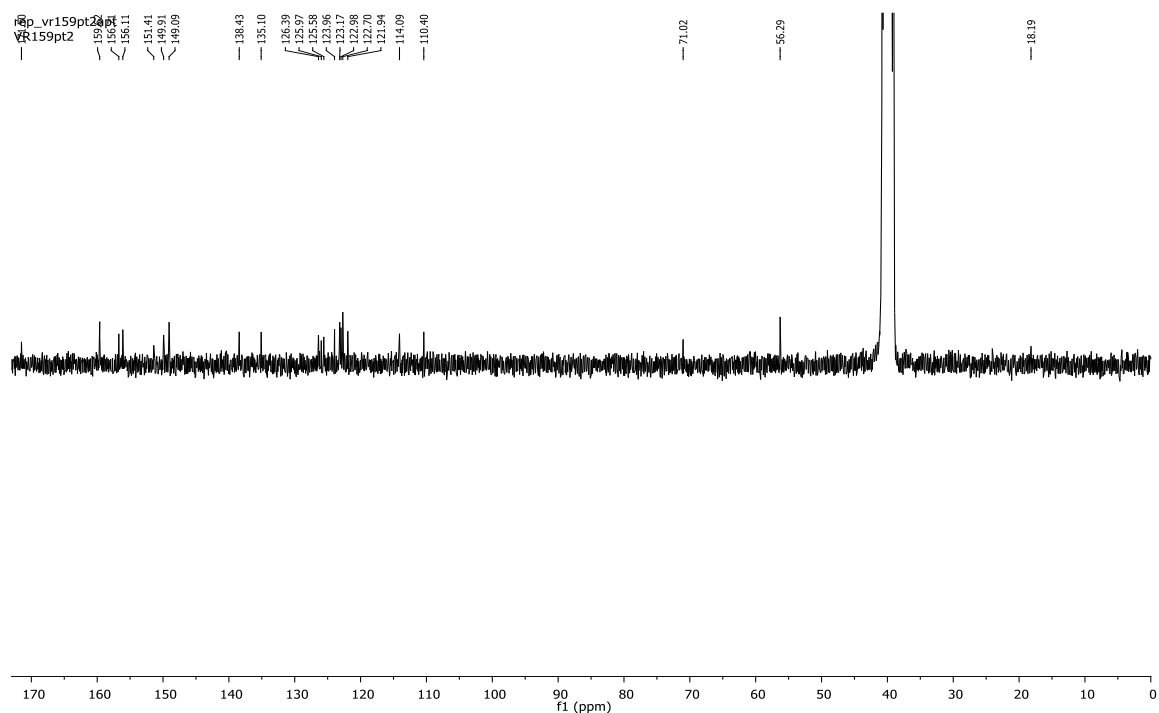

$^{13}\text{C}$  NMR (75 MHz, DMSO)  $\delta$  spectrum of 2-(3-Methoxy-4-(pyridin-2-ylmethoxy)phenyl)-6-(1,4,5,6-tetrahydropyrimidin-2-yl)benzothiazole hydrochloride (**22c**)



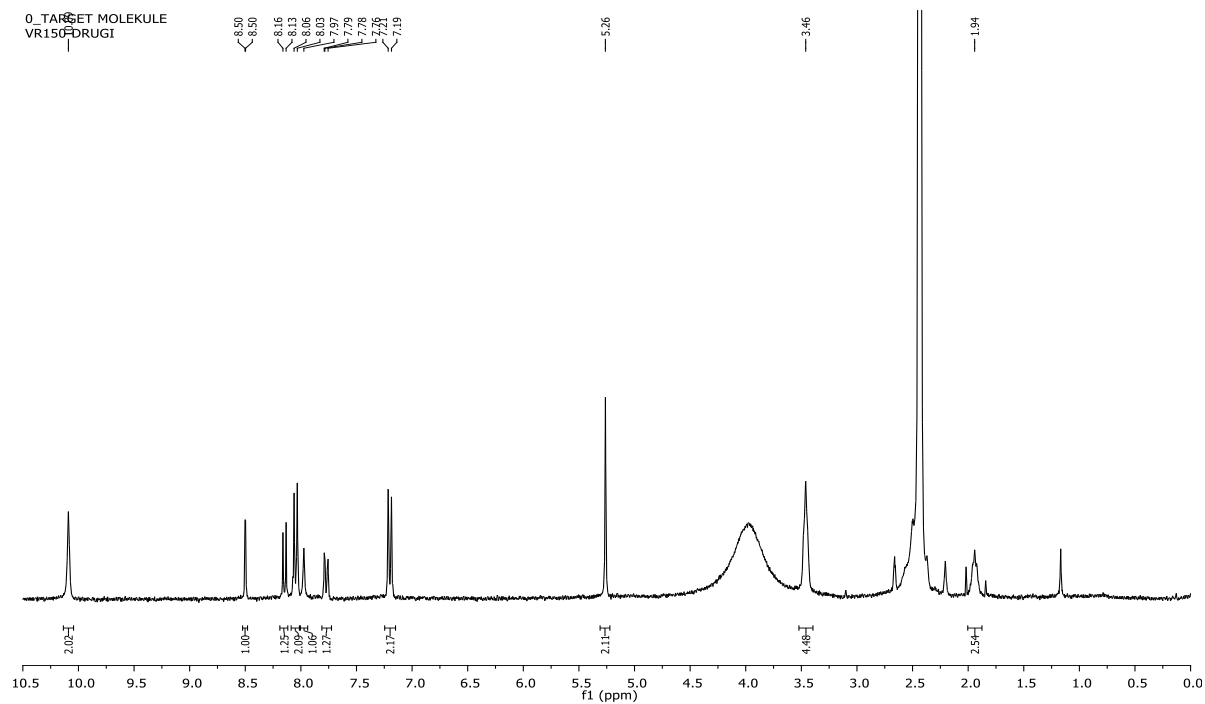

$^1\text{H}$  NMR (300 MHz, DMSO)  $\delta$  spectrum of 2-(4-((1H-1,2,3-triazol-4-yl)methoxy)phenyl)-6-(1,4,5,6-tetrahydropyrimidin-2-yl)benzothiazole hydrochloride (**23a**)

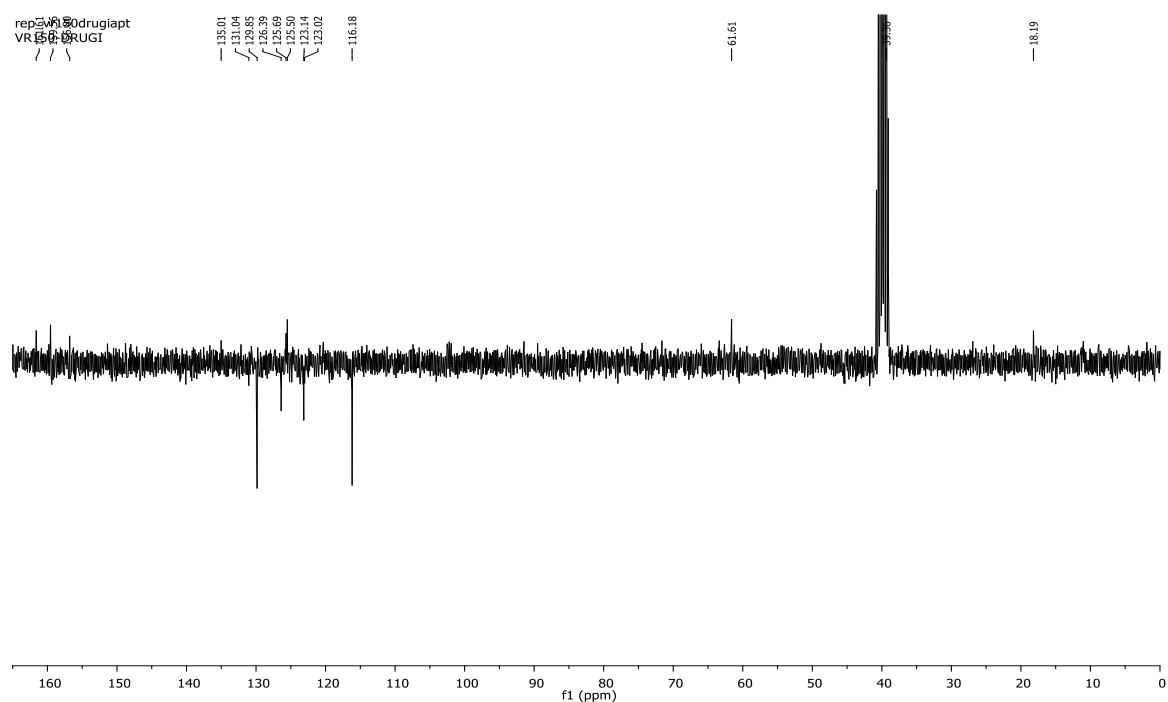

$^{13}\text{C}$  NMR (75 MHz, DMSO)  $\delta$  spectrum of 2-(4-((1H-1,2,3-triazol-4-yl)methoxy)phenyl)-6-(1,4,5,6-tetrahydropyrimidin-2-yl)benzothiazole hydrochloride (**23a**)

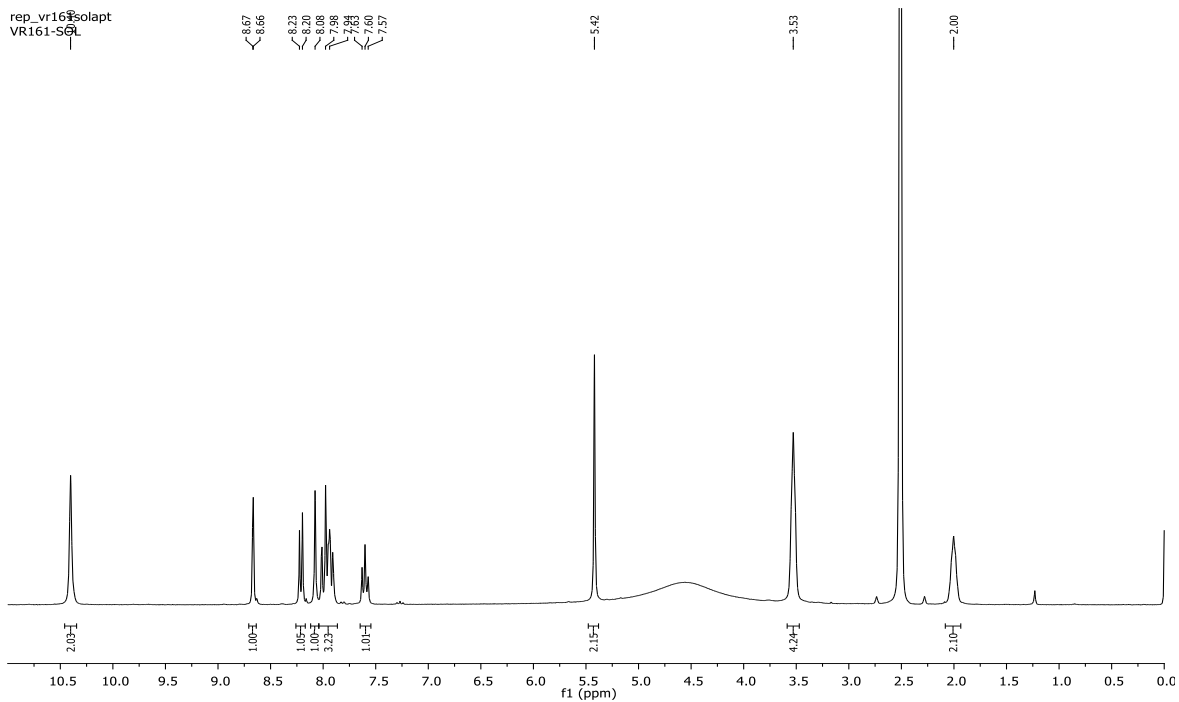

$^1\text{H}$  NMR (300 MHz, DMSO)  $\delta$  spectrum of 2-(3-Fluoro-4-((1H-1,2,3-triazol-4-yl)methoxy)phenyl)-6-(1,4,5,6-tetrahydropyrimidin-2-yl)benzothiazole hydrochloride (**23b**)

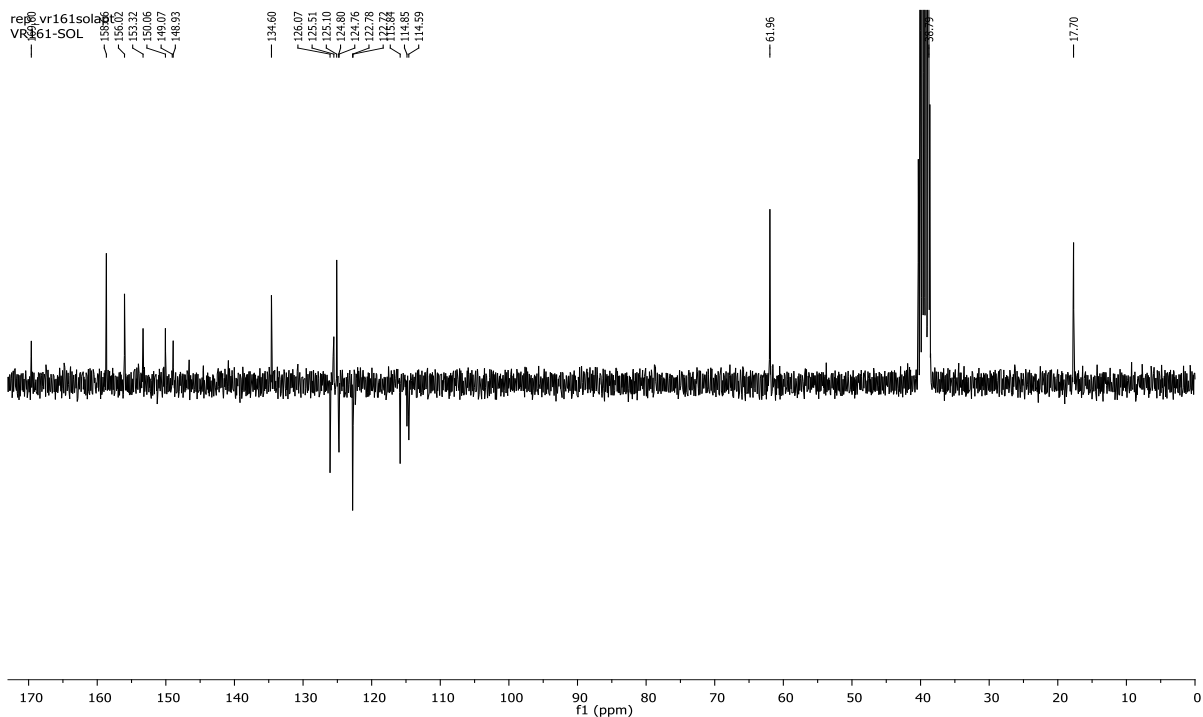

$^{13}\text{C}$  NMR (75 MHz, DMSO)  $\delta$  spectrum of 2-(3-Fluoro-4-((1H-1,2,3-triazol-4-yl)methoxy)phenyl)-6-(1,4,5,6-tetrahydropyrimidin-2-yl)benzothiazole hydrochloride (**23b**)

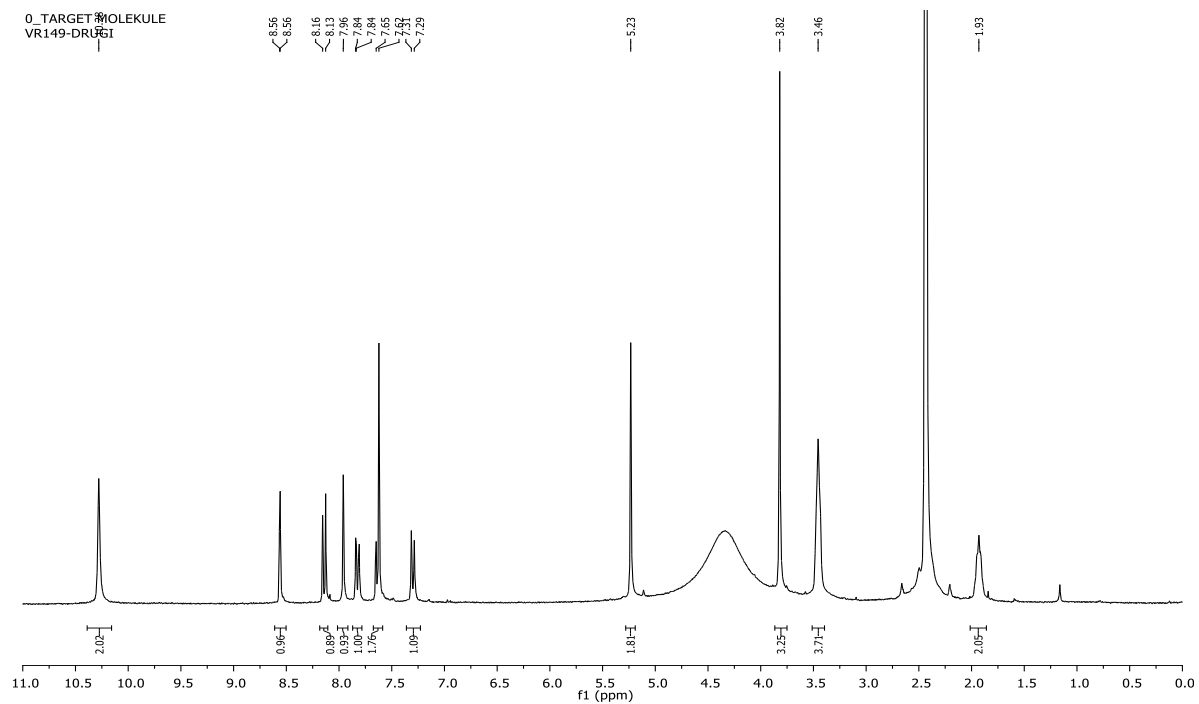

$^1\text{H}$  NMR (300 MHz, DMSO)  $\delta$  spectrum of 2-(3-Methoxy-4-((1H-1,2,3-triazol-4-yl)methoxy)phenyl)-6-(1,4,5,6-tetrahydropyrimidin-2-yl)benzothiazole hydrochloride (**23c**)

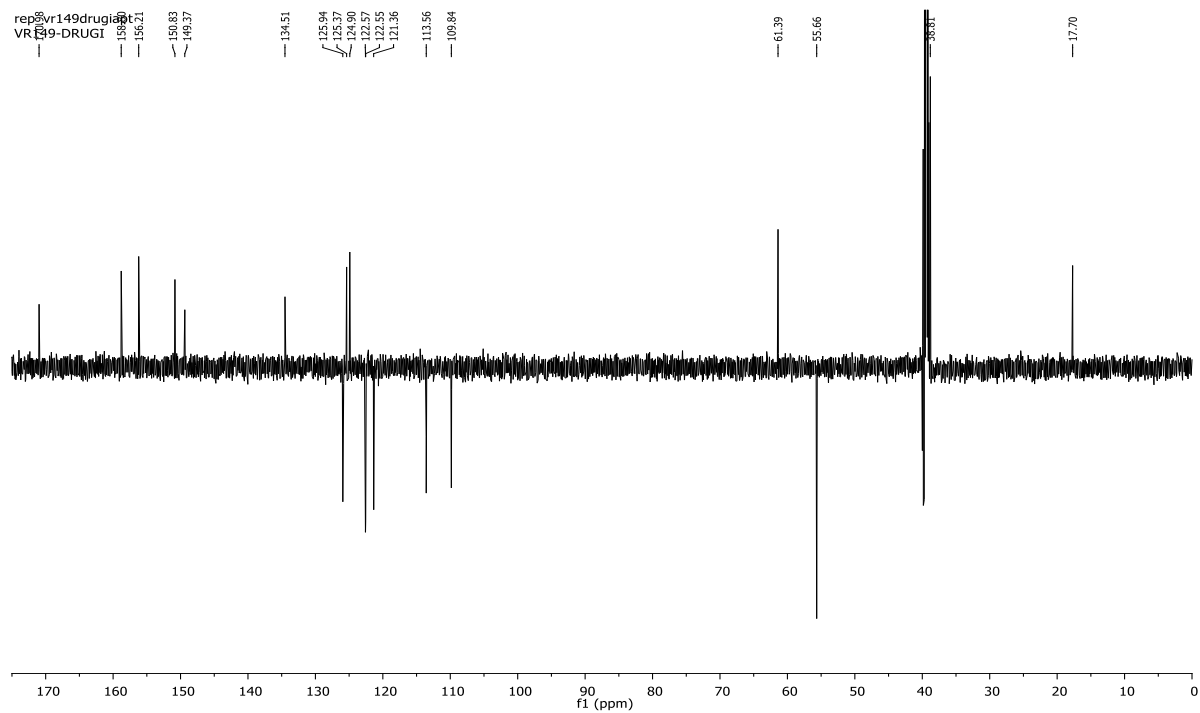

$^{13}\text{C}$  NMR (151 MHz, DMSO)  $\delta$  spectrum of 2-(3-Methoxy-4-((1H-1,2,3-triazol-4-yl)methoxy)phenyl)-6-(1,4,5,6-tetrahydropyrimidin-2-yl)benzothiazole hydrochloride (**23c**)

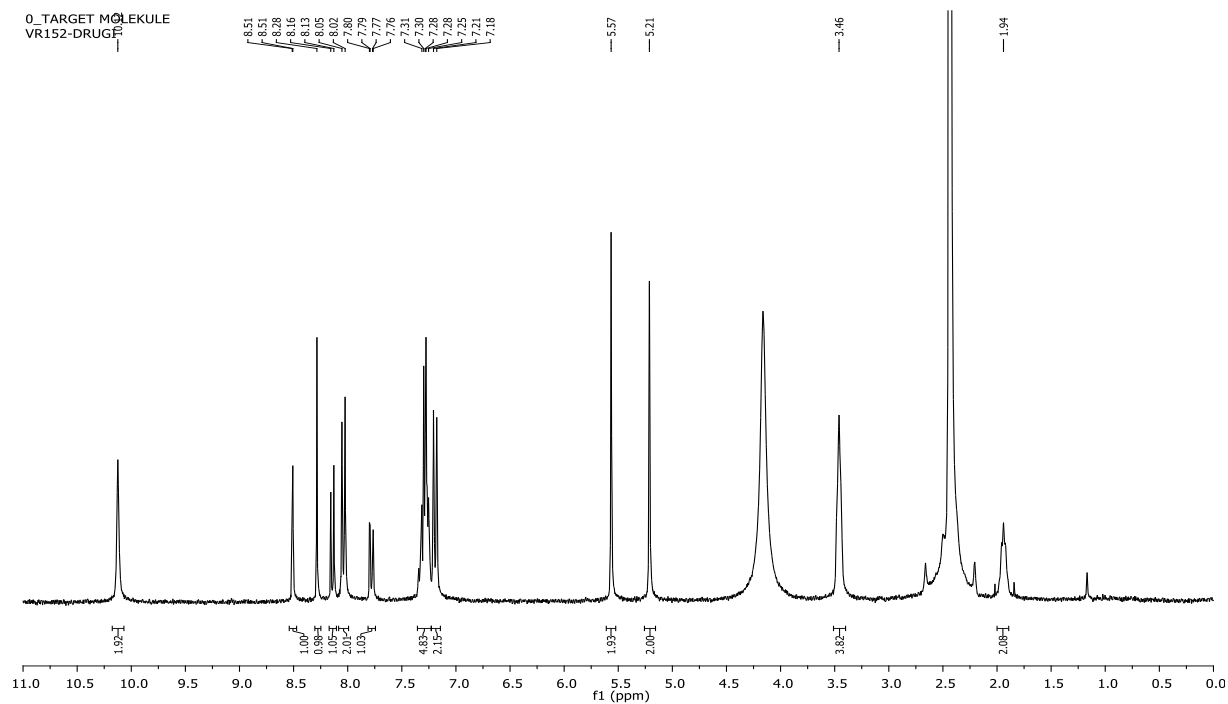

$^1\text{H}$  NMR (300 MHz, DMSO)  $\delta$  spectrum of 2-(4-((1-Benzyl-1H-1,2,3-triazol-4-yl)methoxy)phenyl)-6-(1,4,5,6-tetrahydropyrimidin-2-yl)benzothiazole hydrochloride (**24a**)

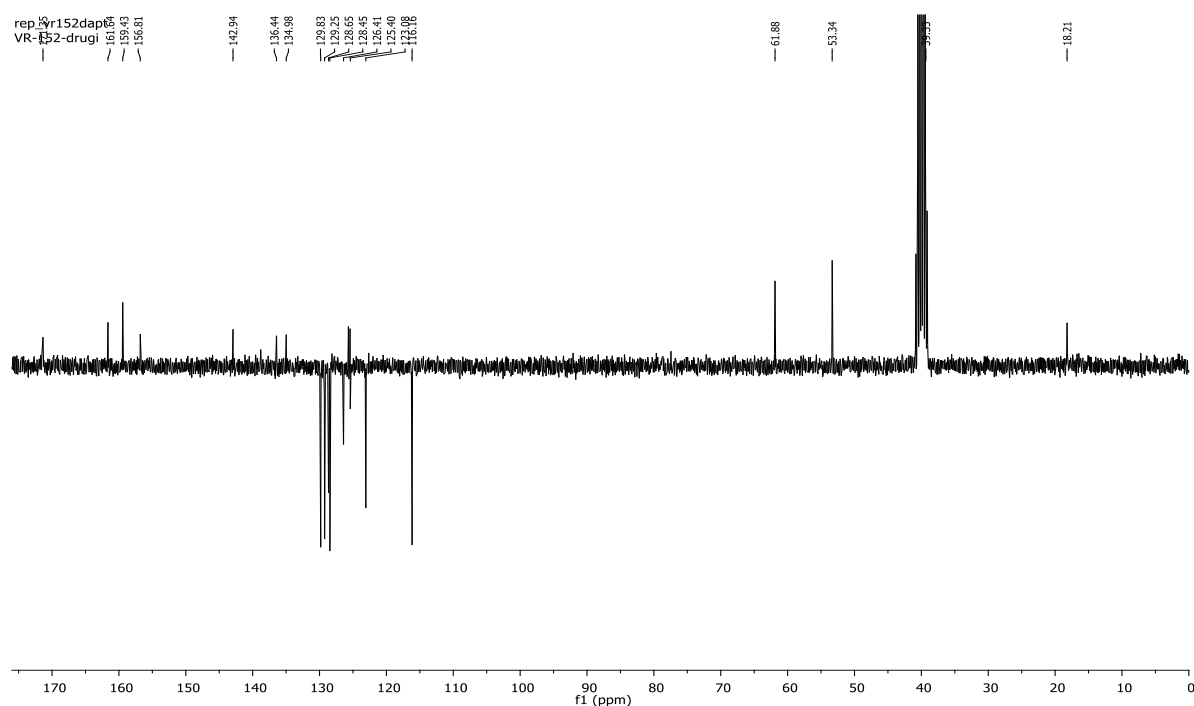

$^{13}\text{C}$  NMR (75 MHz, DMSO)  $\delta$  spectrum of 2-(4-((1-Benzyl-1H-1,2,3-triazol-4-yl)methoxy)phenyl)-6-(1,4,5,6-tetrahydropyrimidin-2-yl)benzothiazole hydrochloride (**24a**)

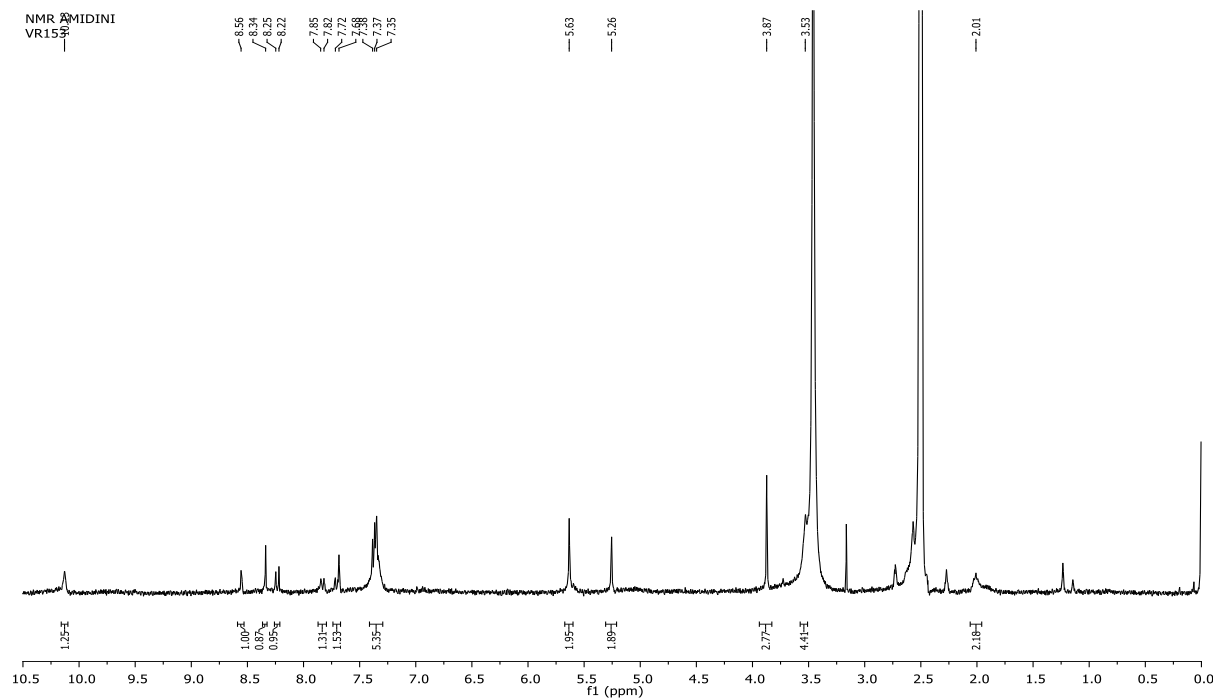

$^1\text{H}$  NMR (300 MHz, DMSO)  $\delta$  spectrum of 2-(3-methoxy-4-((1-benzyl-1H-1,2,3-triazol-4-yl)methoxy)phenyl)-6-(1,4,5,6-tetrahydropyrimidin-2-yl)benzothiazole hydrochloride (**24c**)

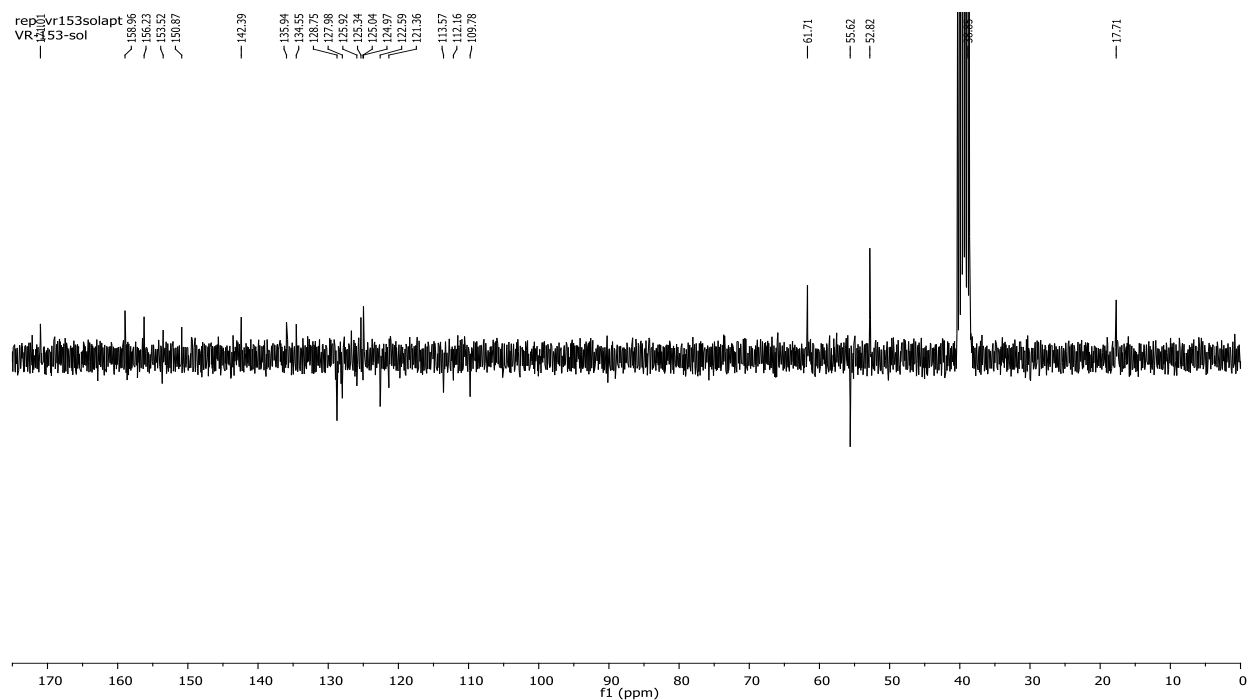

$^{13}\text{C}$  NMR (75 MHz, DMSO)  $\delta$  spectrum of 2-(3-methoxy-4-((1-benzyl-1H-1,2,3-triazol-4-yl)methoxy)phenyl)-6-(1,4,5,6-tetrahydropyrimidin-2-yl)benzothiazole hydrochloride (**24c**)
